# Supplementary material for: Preschoolers’ parent-rated health disparities are strongly associated with measures of adiposity in the Lifeways cohort study children
Source: PubMed Central journal article supplement — BMJ Open. 2014 Jul 21;4(7):e005328. doi: 10.1136/bmjopen-2014-005328 (PMC4120306; doi:10.1136/bmjopen-2014-005328), 2014-07-21
Supplement: bmjopen-2014-005328.draft_revisions.pdf [file bmjopen-2014-005328.draft_revisions.pdf]

# BMJ Open

## Childhood obesity is persistent as a predictor of preschoolers' parent-rated health accounting for social inequalities - Lifeways cross-generation cohort study.

|                                 |                                                                                                                                                                                                                                                                                                                                   |
|---------------------------------|-----------------------------------------------------------------------------------------------------------------------------------------------------------------------------------------------------------------------------------------------------------------------------------------------------------------------------------|
| Journal:                        | <i>BMJ Open</i>                                                                                                                                                                                                                                                                                                                   |
| Manuscript ID:                  | bmjopen-2014-005328                                                                                                                                                                                                                                                                                                               |
| Article Type:                   | Research                                                                                                                                                                                                                                                                                                                          |
| Date Submitted by the Author:   | 23-Mar-2014                                                                                                                                                                                                                                                                                                                       |
| Complete List of Authors:       | Shrivastava, Aakash; University College Dublin, School of Public Health, Physiotherapy & Population Science<br>Murrin, Celine; University College Dublin, School of Public Health, Physiotherapy & Population Science<br>Kelleher, Cecily; University College Dublin, School of Public Health, Physiotherapy & Population Science |
| <b>Primary Subject Heading</b>: | Epidemiology                                                                                                                                                                                                                                                                                                                      |
| Secondary Subject Heading:      | Epidemiology, Public health, Paediatrics                                                                                                                                                                                                                                                                                          |
| Keywords:                       | Lifecourse, self-rated health, obesity, BMI, waist circumference, preschool children                                                                                                                                                                                                                                              |
|                                 |                                                                                                                                                                                                                                                                                                                                   |

SCHOLARONE™  
Manuscripts

1  
2  
3 **Title: Childhood obesity is persistent as a predictor of preschoolers' parent-rated health**  
4 **accounting for social inequalities - Lifeways cross-generation cohort study**  
5  
6

7 **CORRESPONDING AUTHOR:**

8 Professor Cecily C Kelleher

9 School of Public Health, Physiotherapy and Population Science,

10 Woodview House,

11 University College Dublin

12 Belfield,

13 Dublin 4, Republic of Ireland

14 Tel: +3531 7162045

15 Fax: +3531 7163421

16 cecily.kelleher@ucd.ie  
17  
18  
19  
20  
21  
22  
23

24 **AUTHORS**

25 Aakash Shrivastava<sup>1</sup> PhD

26 Celine Murrin<sup>1</sup> PhD

27 Cecily C Kelleher<sup>1</sup> MD

28 <sup>1</sup>School of Public Health, Physiotherapy and Population Science, University College Dublin,  
29 Woodview House, Belfield, Dublin 4, Republic of Ireland  
30  
31  
32  
33  
34

35 **Running Title: Childhood obesity a persistent predictor of preschoolers' PRH**  
36  
37

38 **KEYWORDS**

39 Lifecourse, self-rated health, obesity, BMI, waist circumference, preschool children  
40  
41  
42

43 **Word count: 2486**  
44  
45  
46  
47  
48  
49  
50  
51  
52  
53  
54  
55  
56  
57  
58  
59  
60

**ABSTRACT (Words: 244)****Objective**

To examine the relationship between lifecourse factors from preschoolers' micro-ecosystem and their parent-reported (mother-reported) health (PRH), following them prospectively from preconception to age 5-years. To investigate if preschoolers' BMI and waist-circumference were associated with preschoolers' PRH when controlled for lifecourse predictors.

**Design**

Lifeways cross-generation cohort study

**Setting**

Ireland

**Participants**

Of 1082 families, 62% mothers responded on a health and lifestyle questionnaire at follow-up. Food frequency, BMI and waist-circumference were measured.

**Main outcome measure**

Mother-reported children's PRH at age-5. Associations with child's individual and familial exposures from preconception to age 5-years examined using logistic regression.

**Results**

In univariate analysis, relatively-positive rating of children's PRH were associated with children's lower intake of fats [OR(95%CI)=2.2(1.1-4.3)], higher intake of fruits/vegetables [OR(95%CI)=2.2(1.1-4.3)]; as well as familial socio-economic characteristics {higher household income [OR(95%CI)=3.0(1.6-5.9)], non-entitlement to means-tested healthcare [OR(95%CI)=2.1(1.0-4.3)], mothers' higher education [OR(95%CI)=1.9(1.0-3.6)]}, psycho-

1  
2  
3 social characteristics {father's participation in study [OR(95%CI)=2.1(1.0-4.3)], mothers'  
4 perceiving better support from partner [OR(95%CI)=2.3(1.2-4.3)], children  
5 [OR(95%CI)=1.9(1.0-3.7)] or relatives [OR(95%CI)=2.2(1.1-4.1)]}, parents' lifestyle  
6 {mothers' lower intake of energy [OR(95%CI)=2.2(1.1-4.3)], fathers' non-smoking status  
7 [OR(95%CI)=2.2(1.1-4.4)]}, and parents' health {mothers' self-rated health relatively-  
8 positive [OR(95%CI)=5.1(2.6-9.9)], fathers' self-rated health relatively-positive  
9 [OR(95%CI)=3.0(1.5-6.0)]}.

10  
11  
12 In multivariable analysis ( $\chi^2=34.2, df=21, N=303, R^2=0.26, p<0.05$ ), one of the two strong  
13 predictors of children's relatively-positive PRH was child not being obese by International  
14 Obesity Task Force classification [OR(95%CI)=5.5(1.4-21.0)], observed also using BMI  
15 [OR(95%CI)=0.73(0.58-0.93)] or waist-circumference [OR(95%CI)=0.89(0.81-0.98)] as  
16 continuous variables. The other significant predictor was mothers' self-rated health  
17 relatively-positive [OR(95%CI)=4.2(1.5-12.2)].

### 32 **Conclusions**

33  
34  
35 Preschoolers' health is adversely associated with obesity and this is independent of lifecourse  
36 social and environmental inequalities. Findings have relevance for developmental health  
37 policies.  
38  
39  
40  
41  
42  
43  
44  
45  
46  
47  
48  
49  
50  
51  
52  
53  
54  
55  
56  
57  
58  
59  
60

### Strengths and limitations of this study

- Nationally representative sample of preschool-age children
- Examines the influence of lifecourse adversities, prospectively measured from preconception to age 5 on children's general health at age 5. The study analyses demographic, anthropometric, lifestyle, food and nutrients intake, psycho-social, socio-economic and health-related exposures from both children's individual as well as parental experiences.
- Demonstrates a significant and independent association between preschoolers' measured BMI as well as waist circumference and their general health status.
- The study is limited by a relatively small sample and use of parent-reported health status.

## MAIN TEXT

### Introduction

The development of children is critical to their adult well-being and across the lifecourse even subjective estimates may be useful to reflect objectively measured health. Bronfenbrenner<sup>[1]</sup> emphasised the importance of children's micro-ecosystem in their development. Recently, the World Health Organisation (WHO) presented a model for Early Child Development,<sup>[2]</sup> which again illustrates the importance of individual and family spheres of influence on children's health. The relevance of socio-economic, psycho-social and lifestyle environment in child development and health is widely acknowledged.<sup>[2-4]</sup>

According to the lifecourse hypothesis, risk transmission is characterised by critical periods and accumulation of risk models.<sup>[5]</sup> Based on this, Hertzman and colleagues<sup>[6]</sup> examined self-rated health in adulthood using an integrated lifecourse framework. There are a few other studies also which have examined lifecourse determinants of adult global<sup>[7,8]</sup> or specific health status.<sup>[9]</sup> On the contrary, the literature on the determinants of child global health status is sparse,<sup>[10,11]</sup> particularly for the preschool-age children.<sup>[12]</sup> Even rarer are studies whose examination includes early lifecourse determinants of child global health status.

Thus the first objective of our analysis was to prospectively examine the relationship between demographic, anthropometric, lifestyle, nutritional, psycho-social, socio-economic and health-related lifecourse exposures taken from the children's individual and family spheres of influence starting from preconception up to age 5-years and their global health status at preschool-age.

In social epidemiology, the construct of "embodiment" refers to biological expression of individuals' materio-social world.<sup>[13,14]</sup> Similarly in lifecourse epidemiology, it is

1  
2  
3 hypothesised that early life experiences get “biologically embedded” during critical or  
4  
5 sensitive periods of child development leading to gradients in health.<sup>[15,16]</sup>  
6  
7

8 The Foresight report identifies a large array of environmental determinants of obesity, a  
9  
10 number of which are again related to early child development.<sup>[17]</sup> This suggests obesity as  
11  
12 pivotal risk factor for subsequent health conditions.<sup>[18]</sup>  
13  
14

15 The negative relationship between obesity and self-rated health is now increasingly reported  
16  
17 in adult populations,<sup>[19,20]</sup> some indicating a temporal relationship<sup>[21,22]</sup> and suggesting that  
18  
19 obesity increases health inequalities over time.<sup>[22]</sup> However, evidence on the relationship  
20  
21 between obesity and health is relatively limited in child population studies and those  
22  
23 available have reported health-related-quality-of-life (HR-QoL)<sup>[23]</sup> instead of a generic  
24  
25 measure such as global self-rated health. Moreover, this association is yet to be established  
26  
27 for preschool-age children. To our knowledge just two population based studies have  
28  
29 examined this association in preschool age-group children<sup>[24,25]</sup> and neither had nutritional  
30  
31 information.  
32  
33  
34

35 In the Longitudinal Study of Australian Children, Wake *et al.*<sup>[24]</sup> did not find a significant  
36  
37 difference in global health status of overweight/obese and normal weight 4-5-year-old  
38  
39 children. Skinner *et al.*,<sup>[25]</sup> using data on 3-5-year-olds from the US National Health and  
40  
41 Nutrition Examination Survey, reported a poorer global health status in obese and severely  
42  
43 obese preschoolers. Neither of these studies accounted for a number of possibly relevant  
44  
45 confounders, including parental BMI, parental health and nutritional variables.  
46  
47  
48

49 We thus hypothesised that similar to findings from studies on older age-groups,  
50  
51 anthropometric markers of child obesity in our preschool-age children study would also  
52  
53 demonstrate a negative association with their global health status. The next objective of our  
54  
55 analysis was to examine whether anthropometric markers of child obesity would emerge as  
56  
57  
58  
59  
60

1  
2  
3 strong predictors of global health status when accounted for other socio-economic, psycho-  
4 social, and lifestyle environmental factors in a multivariable model.  
5  
6

## 7 8 **Methods**

9  
10 The Lifeways cross generation cohort study comprises three generations of 1082 Irish  
11 families and was established in 2001-03; the recruitment procedure of this nationally  
12 representative cohort has been described previously.<sup>[26-28]</sup> The a priori purpose was to  
13 examine familial and cross-generation influences on early childhood development over the  
14 first five years of children's lives. Briefly, would-be mothers were at random recruited from  
15 the two regional maternity hospitals in the Republic of Ireland to get a representative sample.  
16  
17

18  
19 At this early pregnancy stage mothers completed a health and lifestyle status questionnaire  
20 adapted from a validated instrument developed for national SLÁN (Survey of Lifestyle,  
21 Attitudes and Nutrition) surveys in Republic of Ireland.<sup>[29]</sup> Mothers reported their pre-  
22 pregnancy height and weight and their smoking status during pregnancy. Mothers' and  
23 partners' socio-economic status was recorded. Subsequently at birth, the live infants were  
24 added to the cohort along-with maternity and birth related hospital information.  
25  
26

27  
28 In 2007-08, when these children averaged five years of age, the cohort follow-up recorded a  
29 62% response rate.<sup>[28,30]</sup> Mothers at follow-up study did not significantly differ in their  
30 baseline BMI from non-responders, suggesting no notable attrition bias.<sup>[28,30]</sup> At this 5-year  
31 follow-up, mothers repeated the health and lifestyle assessment questionnaire, with additional  
32 questions related to her family, including a five-level likert item question "In general, would  
33 you say your / your partner's / your Lifeways child's current health is Excellent, Very Good,  
34 Good, Fair or Poor". Mothers provided information on family's socio-economic, psycho-  
35 social, and lifestyle status. Mothers reported their habitual dietary intake for the previous year  
36 on a semi-quantitative food frequency (SQFFQ) instrument developed from the EPIC study  
37  
38  
39  
40  
41  
42  
43  
44  
45  
46  
47  
48  
49  
50  
51  
52  
53  
54  
55  
56  
57  
58  
59  
60



1  
2  
3 (European Prospective Investigation into Cancer and Nutrition) and validated for Irish adult  
4 population.<sup>[31]</sup> Mothers also gave details for the Lifeways child's habitual diet for the  
5 previous year using a different SQFFQ instrument adapted from the UK National Diet and  
6 Nutrition Survey of 4.5-year-old children.<sup>[32]</sup> The mothers' and children's SQFFQ were  
7 validated in the Lifeways study using a 7-day weighed food diary in a sub-sample.<sup>[30]</sup> Food  
8 items were aggregated by defined shelves of the Irish food pyramid and assessment was made  
9 for average servings per day of standard food item portions consumed from the "top" and  
10 "fruit and vegetable" shelves. The top shelf comprises of high calorie fat and sugar rich  
11 foods. Total energy (kcal) and total fats (g) intake were computed using conversion values  
12 from McCance & Widdowson's food composition tables<sup>[33]</sup> with a specially developed FFQ  
13 software version 1.0 ©.<sup>[34]</sup>

14  
15  
16 Mothers and children, and if available fathers, were offered at 5-year follow-up an  
17 anthropometric assessment at their home for height, weight and waist circumference using a  
18 standardised protocol,<sup>[28,30]</sup> with 80-85% mothers and children participating. Body mass index  
19 (BMI) was calculated from weight and height information ( $\text{kg}/\text{m}^2$ ).

20  
21  
22 Thus variables from discrete stages (pre-pregnancy, early pregnancy, at birth, early infancy  
23 and 5-year follow-up) of child's early development representing lifecourse exposures from  
24 distinct domains (demographic, anthropometric, socio-economic, psycho-social, lifestyle,  
25 nutritional and health) of child's individual and family spheres of influence were considered  
26 to analyse determinants of child's health status at age-5. These lifecourse variables have been  
27 summarised as per time frame in **Table 1**. Additional details on them are provided in **eTable**  
28 **1** available in the web only supplement. The independent variables have been arranged as  
29 child-related, family-related, mother-related, father-related groups for ease of presentation.  
30  
31  
32  
33  
34  
35  
36  
37  
38  
39  
40  
41  
42  
43  
44  
45  
46  
47  
48  
49  
50  
51  
52  
53  
54  
55  
56  
57  
58  
59  
60

Table 1: Independent variables examined from lifecourse of 5-yr-old children

| Lifecourse                      | Independent Variables                                                                                                                                                                                                                                                                                                                                                                                                                                                                                                                                                                                                            |
|---------------------------------|----------------------------------------------------------------------------------------------------------------------------------------------------------------------------------------------------------------------------------------------------------------------------------------------------------------------------------------------------------------------------------------------------------------------------------------------------------------------------------------------------------------------------------------------------------------------------------------------------------------------------------|
| Pre-pregnancy                   | Maternal Pre-pregnancy BMI                                                                                                                                                                                                                                                                                                                                                                                                                                                                                                                                                                                                       |
| Early pregnancy                 | Family stability<br>Maternal smoking in pregnancy, Maternal Education level<br>Paternal Education level                                                                                                                                                                                                                                                                                                                                                                                                                                                                                                                          |
| Birth                           | Child's Birth-weight, Gestational age, Gender<br>Maternal Parity                                                                                                                                                                                                                                                                                                                                                                                                                                                                                                                                                                 |
| Infancy                         | Child's breastfeeding status                                                                                                                                                                                                                                                                                                                                                                                                                                                                                                                                                                                                     |
| When children averaged 5-yr age | Child's Age, Height, BMI, Waist circumference, Food intake: top and fruits & vegetables shelves, Nutrient intake: energy and fats intake<br>Family household weekly income, Entitlement to means tested healthcare benefits scheme, Family structure (marital status), Support from partner, parents, children & relatives<br>Maternal Age, Height, BMI, Waist circumference, Smoking, Employment status, Food intake: top and fruits & vegetables shelves, Nutrient intake: energy and fats intake, Self-rated health status<br>Paternal Height, BMI, Waist circumference, Smoking, Employment status, Self-rated health status |

Children's global health status rated in proxy by their mothers, hereafter referred to as parent-rated health (PRH), was the outcome variable of interest. The 5-graded scale response was dichotomised as relatively-positive health (excellent or very good) and relatively-negative health (poor or fair or good), based on similar dichotomisation in other studies on preschool and school children.<sup>[11,12,24]</sup> It is reasonable to take a higher cut-off when dichotomising this age dependent variable in this very young age-group as there would be very limited numbers of poor or fair health children.<sup>[11,12,35]</sup>

Initially, uni-variate associations were established between the independent predictors and children's PRH using independent t-tests or chi-square tests. Independent categorical variables were dichotomised in a manner that allowed contrasting extreme levels against the others. Thus, using International Obesity Task Force (IOTF) cut-offs, children's BMI was dichotomised as obese versus over-weight or normal-weight. Similarly nutrition variables ordered in quintiles were dichotomised as the extreme quintile (1<sup>st</sup> or 5<sup>th</sup>) versus the rest.

1  
2  
3 From these independent variables principally chosen on the basis of their relevance to the  
4 child's development,<sup>[2,3]</sup> all those that qualified at significance level 20% ( $p < 0.2$ )<sup>[36]</sup> in  
5 univariate analyses were force entered into a multivariable logistic regression model. BMI  
6 and waist circumference, the anthropometric markers of obesity, were tested separately in  
7 independent multivariable models. Initially BMI was tested as a categorical variable in a  
8 model, followed by two additional models substituting it with BMI and then waist  
9 circumference as continuous variables. Other independent variables were tested as categorical  
10 variables.  
11  
12

13  
14  
15  
16  
17  
18  
19  
20  
21 Ethical approval for the Lifeways study was obtained respectively from ethical committees of  
22 participating hospitals and the University College Dublin, Ireland. Written informed consent  
23 was obtained from study participants.  
24  
25  
26  
27

## 28 **Results**

29  
30  
31 There were 547 family datasets available for analysis of children's PRH. **Table 2** presents the  
32 uni-variate associations between children's lifecourse variables and PRH. Within the  
33 individual-sphere of influences, children's lifestyle behaviours (lower intake of fatty/sugary  
34 foods and total fats, and higher intake of fruits/vegetables) and their anthropometric measures  
35 at age-5 (not being obese, lower BMI, and lower waist circumference) qualified as  
36 determinants of children's relatively-positive PRH for further examination in the  
37 multivariable model.  
38  
39  
40  
41  
42  
43  
44  
45

46  
47 Within the family-sphere of influences, socio-economic status (higher household income,  
48 non-entitlement to subsidised healthcare, both parents' higher education status, and father's  
49 employment status), psycho-social status (father's study participation, mother's perceived  
50 social support), mother's lifestyle behaviours (lower intake of fatty/sugary foods, total energy  
51 and total fats), father's lifestyle behaviours (non-smoker), and both parents' health status  
52  
53  
54  
55  
56  
57  
58  
59  
60

1  
2  
3  
4  
5  
6  
7  
8  
9  
10  
11  
12  
13  
14  
15  
16  
17  
18  
19  
20  
21  
22  
23  
24  
25  
26  
27  
28  
29  
30  
31  
32  
33  
34  
35  
36  
37  
38  
39  
40  
41  
42  
43  
44  
45  
46  
47  
48  
49  
50  
51  
52  
53  
54  
55  
56  
57  
58  
59  
60

(relatively-positive self-rated health) qualified as determinants of children’s relatively-positive PRH for further examination in the multivariable model.

For peer review only

Table 2: Uni-variate lifecourse associates of children's relatively-positive parent-rated health, PRH (N=547)

|                                               | N   | Relatively Negative PRH<br>(n=42) |              | Relatively Positive PRH<br>(n=505) |              | OR   | 95% CI                    |
|-----------------------------------------------|-----|-----------------------------------|--------------|------------------------------------|--------------|------|---------------------------|
|                                               |     | %(n)                              | Mean (SD)    | %(n)                               | Mean (SD)    |      |                           |
| <b>Child's Individual Characteristics</b>     |     |                                   |              |                                    |              |      |                           |
| Birth-weight adjusted for gestational age (g) | 487 | (34)                              | 3564.1 (616) | (453)                              | 3548.4 (552) | 1.00 | (0.999-1.001)             |
| Child's Age (Yrs)                             | 547 | (42)                              | 5.42 (0.23)  | (505)                              | 5.46 (0.25)  |      |                           |
| Gender                                        | 547 |                                   |              |                                    |              |      |                           |
| Male                                          |     | 8.0% (22)                         |              | 92.0% (242)                        |              | Ref  |                           |
| Female                                        |     | 7.1% (21)                         |              | 92.9% (262)                        |              | 1.14 | (0.60-2.20)               |
| BMI (kg/m <sup>2</sup> )                      | 464 | (35)                              | 17.09 (2.5)  | (429)                              | 16.59 (1.6)  | 0.85 | (0.71-1.03) <sup>^</sup>  |
| BMI [IOTF]                                    | 464 |                                   |              |                                    |              |      |                           |
| Obese                                         |     | 16.7% (5)                         |              | 83.3% (25)                         |              | Ref  |                           |
| Overweight / Normal                           |     | 6.9% (30)                         |              | 93.1% (404)                        |              | 2.69 | (0.96-7.54) <sup>^</sup>  |
| Waist Circumference (cm)                      | 462 | (35)                              | 57.01 (6.8)  | (427)                              | 55.88 (4.3)  | 0.95 | (0.88-1.02) <sup>+</sup>  |
| Height (cm)                                   | 464 | (35)                              | 111.6 (5.6)  | (429)                              | 112.1 (4.8)  | 1.02 | (0.95-1.10)               |
| Breastfeeding                                 | 528 |                                   |              |                                    |              |      |                           |
| Not breastfed                                 |     | 6.5% (16)                         |              | 93.5% (229)                        |              | Ref  |                           |
| Breastfed                                     |     | 8.8% (25)                         |              | 91.2% (258)                        |              | 0.72 | (0.38-1.38)               |
| Energy (Kcal)                                 | 547 |                                   |              |                                    |              |      |                           |
| Quintile 5 (>1794 kcal)                       |     | 10% (11)                          |              | 90.0% (99)                         |              | Ref  |                           |
| Quintile 1-4                                  |     | 7.1% (31)                         |              | 92.9% (406)                        |              | 1.46 | (0.71-3.00)               |
| Fats (g)                                      | 547 |                                   |              |                                    |              |      |                           |
| Quintile 5 (>62.9 g)                          |     | 12.8% (14)                        |              | 87.2% (95)                         |              | Ref  |                           |
| Quintile 1-4                                  |     | 6.4% (28)                         |              | 93.6% (410)                        |              | 2.16 | (1.09-4.26) <sup>+</sup>  |
| Top shelf (servings/day)                      | 547 |                                   |              |                                    |              |      |                           |
| Quintile 5 (>6.47 servings)                   |     | 10.9% (12)                        |              | 89.1% (98)                         |              | Ref  |                           |
| Quintile 1-4                                  |     | 6.9% (30)                         |              | 93.1% (407)                        |              | 1.66 | (0.82-3.36) <sup>+</sup>  |
| Fruits Veg shelf (servings/d)                 | 547 |                                   |              |                                    |              |      |                           |
| Quintile 1 (<2.1 servings)                    |     | 12.8% (14)                        |              | 87.2% (95)                         |              | Ref  |                           |
| Quintile 2-5                                  |     | 6.4% (28)                         |              | 93.6% (410)                        |              | 2.16 | (1.09-4.26) <sup>+</sup>  |
| <b>Family Characteristics</b>                 |     |                                   |              |                                    |              |      |                           |
| Household Weekly Income                       | 509 |                                   |              |                                    |              |      |                           |
| Less than 760 Euros/wk                        |     | 13.3% (26)                        |              | 86.7% (170)                        |              | Ref  |                           |
| More than 760 Euros/wk                        |     | 4.8% (15)                         |              | 95.2% (298)                        |              | 3.04 | (1.57-5.90) <sup>++</sup> |
| Entitlement to General Medical Card           | 532 |                                   |              |                                    |              |      |                           |
| Entitled                                      |     | 13% (12)                          |              | 87.0% (80)                         |              | Ref  |                           |
| Not entitled                                  |     | 6.6% (29)                         |              | 93.4% (411)                        |              | 2.13 | (1.04-4.34) <sup>+</sup>  |
| Fathers' Participation                        | 547 |                                   |              |                                    |              |      |                           |
| Not                                           |     | 9.7% (31)                         |              | 90.3% (290)                        |              | Ref  |                           |
| Yes                                           |     | 4.9% (11)                         |              | 95.1% (215)                        |              | 2.09 | (1.03-4.25) <sup>+</sup>  |
| Marital Status                                | 542 |                                   |              |                                    |              |      |                           |
| Others                                        |     | 11.4% (5)                         |              | 88.6% (39)                         |              | Ref  |                           |
| Married/Cohabiting                            |     | 7.2% (36)                         |              | 92.8% (462)                        |              | 1.65 | (0.61-4.43)               |
| Elder children in family (Parity)             | 535 |                                   |              |                                    |              |      |                           |
| Nullipara                                     |     | 8% (18)                           |              | 92.0% (207)                        |              | Ref  |                           |
| Multipara                                     |     | 7.7% (24)                         |              | 92.3% (286)                        |              | 1.04 | (0.55-1.96)               |
| Support from Spouse/Partner                   | 538 |                                   |              |                                    |              |      |                           |
| Lesser support                                |     | 12.9% (17)                        |              | 87.1% (115)                        |              | Ref  |                           |
| More support                                  |     | 6.2% (25)                         |              | 93.8% (381)                        |              | 2.25 | (1.18-4.32) <sup>+</sup>  |
| Support from Parents                          | 487 |                                   |              |                                    |              |      |                           |
| Lesser support                                |     | 12.5% (12)                        |              | 87.5% (84)                         |              | Ref  |                           |
| More support                                  |     | 6.6% (26)                         |              | 93.4% (365)                        |              | 2.01 | (0.97-4.14) <sup>^</sup>  |
| Support from Children                         | 532 |                                   |              |                                    |              |      |                           |
| Lesser support                                |     | 10.6% (20)                        |              | 89.4% (169)                        |              | Ref  |                           |
| More support                                  |     | 5.8% (20)                         |              | 94.2% (323)                        |              | 1.91 | (1.00-3.65) <sup>+</sup>  |
| Support from Close Relatives                  | 510 |                                   |              |                                    |              |      |                           |
| Lesser support                                |     | 12.4% (19)                        |              | 87.6% (134)                        |              | Ref  |                           |
| More support                                  |     | 6.2% (22)                         |              | 93.8% (335)                        |              | 2.16 | (1.13-4.12) <sup>+</sup>  |

Table 2: Uni-variate lifecourse associates of children's relatively-positive parent-rated health, PRH (continued)

|                                            | N   | Relatively Negative PRH<br>(n=42) |             | Relatively Positive PRH<br>(n=505) |             | OR   | 95% CI        |
|--------------------------------------------|-----|-----------------------------------|-------------|------------------------------------|-------------|------|---------------|
|                                            |     | %(n)                              | Mean (SD)   | %(n)                               | Mean (SD)   |      |               |
| <b>Maternal Characteristics</b>            |     |                                   |             |                                    |             |      |               |
| Pre-pregnancy BMI (kg/m <sup>2</sup> )     | 475 | (36)                              | 23.3 (3.3)  | (439)                              | 23.8 (3.9)  | 1.04 | (0.94-1.14)   |
| Pre-pregnancy BMI [WHO cut offs]           |     |                                   |             |                                    |             |      |               |
| Obese                                      |     | 2.6% (1)                          |             | 97.4% (38)                         |             | Ref  |               |
| Overweight / Normal                        |     | 8% (35)                           |             | 92.0% (401)                        |             | 0.30 | (0.04-2.26)   |
| Mother's Age (Yrs)                         | 546 | (42)                              | 36.5 (6.3)  | (504)                              | 37.1 (5.3)  | 1.02 | (0.96-1.08)   |
| BMI at 5-yr follow-up (kg/m <sup>2</sup> ) | 432 |                                   | 25.6 (3.9)  |                                    | 26.3 (5.0)  | 1.03 | (0.95-1.12)   |
| BMI at 5-yr follow-up [WHO cut offs]       | 432 |                                   |             |                                    |             |      |               |
| Obese                                      |     | 7.2% (5)                          |             | 92.8% (64)                         |             | Ref  |               |
| Overweight / Normal                        |     | 7.4% (27)                         |             | 92.6% (336)                        |             | 0.97 | (0.36-2.62)   |
| Waist Circumference (cm)                   | 434 | (31)                              | 85.3 (10.6) | (403)                              | 87.6 (11.9) | 1.02 | (0.99-1.05)   |
| Height (cm)                                | 454 | (33)                              | 161.9 (6.8) | (421)                              | 162.9 (6.0) | 1.03 | (0.97-1.09)   |
| Smoking in pregnancy                       | 534 |                                   |             |                                    |             |      |               |
| Smoker                                     |     | 8.1% (8)                          |             | 91.9% (91)                         |             | Ref  |               |
| Non-Smoker                                 |     | 7.6% (33)                         |             | 92.4% (402)                        |             | 1.07 | (0.48-2.4)    |
| Smoking at 5-yr follow-up                  | 541 |                                   |             |                                    |             |      |               |
| Smoker                                     |     | 7.6% (9)                          |             | 92.4% (110)                        |             | Ref  |               |
| Non-Smoker                                 |     | 7.6% (32)                         |             | 92.4% (390)                        |             | 1.0  | (0.46-2.15)   |
| Energy (Kcal)                              | 546 |                                   |             |                                    |             |      |               |
| Quintile 5 (>2570.9 kcal)                  |     | 13% (14)                          |             | 87.0% (94)                         |             | Ref  |               |
| Quintile 1-4                               |     | 6.4% (28)                         |             | 93.6% (410)                        |             | 2.18 | (1.11-4.30)*  |
| Fats (g)                                   | 546 |                                   |             |                                    |             |      |               |
| Quintile 5 (>106 g)                        |     | 11% (12)                          |             | 89.0% (97)                         |             | Ref  |               |
| Quintile 1-4                               |     | 6.9% (30)                         |             | 93.1% (407)                        |             | 1.68 | (0.83-3.40)†  |
| Top shelf (servings/day)                   | 545 |                                   |             |                                    |             |      |               |
| Quintile 5 (>8.35 servings)                |     | 11% (12)                          |             | 89.0% (97)                         |             | Ref  |               |
| Quintile 1-4                               |     | 6.9% (30)                         |             | 93.1% (406)                        |             | 1.67 | (0.83-3.39)†  |
| Fruits Veg shelf (servings/day)            | 546 |                                   |             |                                    |             |      |               |
| Quintile 1 (<4.5 servings)                 |     | 9.1% (10)                         |             | 90.9% (100)                        |             | Ref  |               |
| Quintile 2-5                               |     | 7.3% (32)                         |             | 92.7% (404)                        |             | 1.26 | (0.60-2.65)   |
| Education level                            | 534 |                                   |             |                                    |             |      |               |
| Lower                                      |     | 10.4% (25)                        |             | 89.6% (215)                        |             | Ref  |               |
| Third Level                                |     | 5.8% (17)                         |             | 94.2% (277)                        |             | 1.90 | (1.00-3.60)*  |
| Employment                                 | 545 |                                   |             |                                    |             |      |               |
| Not Earning                                |     | 6.4% (15)                         |             | 93.6% (221)                        |             | Ref  |               |
| Employed                                   |     | 9% (22)                           |             | 91.0% (222)                        |             | 0.69 | (0.35-1.36)   |
| Self employed                              |     | 7.7% (5)                          |             | 92.3% (60)                         |             | 0.81 | (0.29-2.33)   |
| Self reported health                       | 546 |                                   |             |                                    |             |      |               |
| Relatively Negative                        |     | 17.1% (27)                        |             | 82.9% (131)                        |             | Ref  |               |
| Relatively Positive                        |     | 3.9% (15)                         |             | 96.1% (373)                        |             | 5.10 | (2.64-9.93)** |
| <b>Paternal Characteristics</b>            |     |                                   |             |                                    |             |      |               |
| BMI at 5-yr follow-up (kg/m <sup>2</sup> ) | 66  | (4)                               |             | (62)                               |             | 0.97 | (0.76-1.23)   |
| Waist Circumference (cm)                   | 65  | (3)                               |             | (62)                               |             | 1.01 | (0.90-1.13)   |
| Height (cm)                                | 66  | (4)                               |             | (62)                               |             | 1.01 | (0.88-1.15)   |
| Smoking at 5-yr follow-up                  | 521 |                                   |             |                                    |             |      |               |
| Smoker                                     |     | 11.5% (16)                        |             | 88.5% (123)                        |             | Ref  |               |
| Non-Smoker                                 |     | 5.5% (21)                         |             | 94.5% (361)                        |             | 2.24 | (1.13-4.42)*  |
| Education level                            | 514 |                                   |             |                                    |             |      |               |
| Lower                                      |     | 11.1% (16)                        |             | 88.9% (128)                        |             | Ref  |               |
| Third Level                                |     | 6.2% (23)                         |             | 93.8% (347)                        |             | 1.89 | (0.97-3.68)^  |
| Employment                                 | 518 |                                   |             |                                    |             |      |               |
| Not Earning                                |     | 9.2% (8)                          |             | 90.8% (79)                         |             | Ref  |               |
| Employed                                   |     | 7.9% (24)                         |             | 92.1% (279)                        |             | 1.18 | (0.51-2.72)   |
| Self employed                              |     | 3.9% (5)                          |             | 96.1% (123)                        |             | 2.49 | (0.79-7.89)†  |
| Self reported health                       | 510 |                                   |             |                                    |             |      |               |
| Relatively Negative                        |     | 12.6% (20)                        |             | 87.4% (139)                        |             | Ref  |               |
| Relatively Positive                        |     | 4.6% (16)                         |             | 95.4% (335)                        |             | 3.01 | (1.52-5.99)** |

\*\*p&lt;0.01, \*p&lt;0.05, ^p&lt;0.1, †p&lt;0.2; Ref=reference category (OR=1)

1  
2  
3 **Table 3** presents the multivariable model for association between qualifying lifecourse  
4 variables and children's relatively-positive PRH at age-5. A significantly strong predictor of  
5 children's relatively-positive PRH was child's not being obese by IOTF classification. When  
6 BMI was tested as a continuous variable, there was 0.73 times less likelihood of the child  
7 being positively rated on health status for every 1 kg/m<sup>2</sup> increase in their BMI. Similarly in  
8 the waist circumference model, for every 1 cm increase there was 0.89 times less likelihood  
9 of the child getting a relatively-positive rating on health status. Another significant predictor  
10 of children's relatively-positive PRH was mother's having rated her own health as relatively-  
11 positive. These predictors maintained the highest strength of association with children's  
12 health status when independent variables were standardised (see **eTable 2** in the web only  
13 supplement). None of the other variables reached the level of statistical significance. The  
14 models explained over 25 percent of variance for children's PRH.  
15  
16  
17  
18  
19  
20  
21  
22  
23  
24  
25  
26  
27  
28  
29  
30  
31  
32  
33  
34  
35  
36  
37  
38  
39  
40  
41  
42  
43  
44  
45  
46  
47  
48  
49  
50  
51  
52  
53  
54  
55  
56  
57  
58  
59  
60

Table 3: Multivariable Logistic Regression model for predictors of children’s relatively-positive parent-rated health, PRH (N=303)

|                                                                        | Relatively Positive PRH      |                 | Relatively Positive PRH     |                 | Relatively Positive PRH    |                 |
|------------------------------------------------------------------------|------------------------------|-----------------|-----------------------------|-----------------|----------------------------|-----------------|
|                                                                        | BMI Categorical <sup>1</sup> |                 | BMI Continuous <sup>2</sup> |                 | WC Continuous <sup>3</sup> |                 |
|                                                                        | OR                           | 95% CI          | OR                          | 95% CI          | OR                         | 95% CI          |
| <b>Child's Individual Characteristics</b>                              |                              |                 |                             |                 |                            |                 |
| BMI [IOTF], Obese <sup>+</sup> vs Overweight / Normal                  | 5.48                         | (1.43-21.03) *  |                             |                 |                            |                 |
| BMI kg/m <sup>2</sup> [Continuous]                                     |                              |                 | 0.73                        | (0.58-0.93) **  |                            |                 |
| Waist Circumference cm [Continuous]                                    |                              |                 |                             |                 | 0.89                       | (0.81-0.98) *   |
| Fats gm [Quintiles], Q5 <sup>+</sup> vs Q1-4                           | 1.57                         | (0.42-5.79)     | 1.49                        | (0.40-5.53)     | 1.32                       | (0.36-4.80)     |
| Top shelf servings/d [Quintiles], Q5 <sup>+</sup> vs Q1-4              | 1.23                         | (0.33-4.53)     | 1.30                        | (0.36-4.63)     | 1.29                       | (0.36-4.62)     |
| Fruits Veg shelf servings/d [Quintiles], Q1 <sup>+</sup> vs Q2-5       | 2.57                         | (0.75-8.80)     | 2.86                        | (0.83-9.93)     | 2.73                       | (0.78-9.49)     |
| <b>Family Characteristics</b>                                          |                              |                 |                             |                 |                            |                 |
| Household Weekly Income, Less <sup>+</sup> vs High                     | 1.85                         | (0.63-5.40)     | 1.76                        | (0.59-5.21)     | 1.79                       | (0.61-5.26)     |
| Entitlement to General Medical, Card Yes <sup>+</sup> vs No            | 0.94                         | (0.24-3.71)     | 1.03                        | (0.26-4.07)     | 1.04                       | (0.26-4.10)     |
| Fathers' Participation, Not <sup>+</sup> vs Yes                        | 1.88                         | (0.68-5.21)     | 1.86                        | (0.67-5.16)     | 2.06                       | (0.74-5.71)     |
| Support from Spouse/Partner, Less <sup>+</sup> vs More                 | 0.70                         | (0.20-2.49)     | 0.67                        | (0.19-2.33)     | 0.74                       | (0.22-2.52)     |
| Support from Parents, Less <sup>+</sup> vs More                        | 1.92                         | (0.53-6.93)     | 2.33                        | (0.64-8.42)     | 2.37                       | (0.66-8.53)     |
| Support from Children, Less <sup>+</sup> vs More                       | 1.15                         | (0.38-3.45)     | 1.29                        | (0.42-3.91)     | 1.25                       | (0.41-3.82)     |
| Support from Close Relatives, Less <sup>+</sup> vs More                | 0.86                         | (0.23-3.13)     | 0.84                        | (0.24-3.02)     | 0.84                       | (0.23-3.01)     |
| <b>Maternal Characteristics</b>                                        |                              |                 |                             |                 |                            |                 |
| Energy Kcal [Quintiles], Q5 <sup>+</sup> vs Q1-4                       | 1.89                         | (0.30-11.84)    | 2.00                        | (0.31-12.86)    | 1.57                       | (0.28-8.84)     |
| Fats gm [Quintiles], Q5 <sup>+</sup> vs Q1-4                           | 0.72                         | (0.09-5.54)     | 0.59                        | (0.07-4.77)     | 0.92                       | (0.13-6.41)     |
| Top shelf servings/d [Quintiles], Q5 <sup>+</sup> vs Q1-4              | 1.08                         | (0.29-3.94)     | 1.30                        | (0.36-4.65)     | 1.18                       | (0.32-4.34)     |
| Education, Lower <sup>+</sup> vs Third level                           | 1.34                         | (0.47-3.78)     | 1.35                        | (0.48-3.80)     | 1.48                       | (0.53-4.13)     |
| Self reported health status, Rel.Negative <sup>+</sup> vs Rel.Positive | 4.20                         | (1.45-12.20) ** | 4.42                        | (1.53-12.79) ** | 4.17                       | (1.47-11.87) ** |
| <b>Paternal Characteristics</b>                                        |                              |                 |                             |                 |                            |                 |
| Current Smoking status, Yes <sup>+</sup> vs No                         | 1.37                         | (0.48-3.93)     | 1.31                        | (0.45-3.83)     | 1.53                       | (0.54-4.35)     |
| Education, Lower <sup>+</sup> vs Third level                           | 0.69                         | (0.21-2.28)     | 0.79                        | (0.24-2.57)     | 0.83                       | (0.26-2.67)     |
| Employment, Non-earning <sup>+</sup> vs Self employed                  | 1.60                         | (0.73-3.53)     | 1.52                        | (0.69-3.32)     | 1.57                       | (0.70-3.53)     |
| Self reported health status, Rel.Negative <sup>+</sup> vs Rel.Positive | 1.48                         | (0.52-4.20)     | 1.54                        | (0.54-4.35)     | 1.43                       | (0.51-3.96)     |

OR=Odds Ratio; <sup>+</sup>Reference category (OR=1); \*\*p<0.01 (2-tailed), \*p<0.05 (2-tailed)

Rel.Negative=Relatively Negative, Rel.Positive=Relatively Positive

<sup>1</sup>Child BMI as a categorical variable; Model Chi-sq = 34.2, df = 21, p = 0.034; -2LL = 128.6, Nagelkerke R-sq = 0.26

<sup>2</sup>Child BMI as a continuous variable; Model Chi-sq = 35.9, df = 21, p = 0.022; -2LL = 126.9, Nagelkerke R-sq = 0.27

<sup>3</sup>Child waist circumference as a continuous variable; Model Chi-sq = 33.8, df = 21, p = 0.038; -2LL = 128.9, Nagelkerke R-sq = 0.25



## Discussion

This analysis showed that determinants from both child's individual and family spheres have an influence on child's health at preschool-age. The factors from all three material, psycho-social and lifestyle domains, the major explanations for child health inequalities,<sup>[4]</sup> were associated at uni-variate levels. However, in the final model this analysis clearly demonstrated a negative association between child's obesity and health status. Child's not being obese was one of the significantly strong predictors of child's relatively-positive health status, which was also observed with measured BMI and waist circumference analysed as continuous variables.

This negative relationship observed between measured obesity and PRH conforms to published literature on primary school age-group children and adolescents.<sup>[37-39]</sup> Most importantly, for the first time to our knowledge, this analysis demonstrates the association having adjusted for food and nutrient intake, along-with a wide range of other explanatory variables.

Self-rated health is a valid measure of morbidity, mortality, longevity and health status,<sup>[40]</sup> also in Irish adult<sup>[41,42]</sup> and children<sup>[10]</sup>. Use of parent proxy for child self-reported health is justified for children too young to have adequate cognitive skills.<sup>[43,44]</sup> Systematic reviews report good agreement between ratings by children and their parents on child HRQoL, particularly for physical health domain.<sup>[43,44]</sup> Parents tend to be thoughtful when responding to proxy questions and report children's usual health disposition.<sup>[45]</sup> Studies on construct validity report positively.<sup>[46-49]</sup> Maternal ratings of child's general health status were found sensitive when validated against children's illnesses and other morbidity or healthcare indicators,<sup>[35,50-52]</sup> including evidence of a gradient in strength of these associations.<sup>[35]</sup> Many national-level studies have accepted parent proxy as an appropriate measure<sup>[11,12,53,54]</sup> and successfully used it to longitudinally demonstrate risk and consequences of child health.<sup>[11,53]</sup>

1  
2  
3 Self-rated health, a composite measure, represents all domains of HR-QoL,<sup>[40]</sup> but better represents  
4 physical health than HR-QoL.<sup>[55]</sup> Studies on older age-group children have reported stronger/sole  
5 negative associations for general/physical health domain of HR-QoL and obesity,<sup>[38,56]</sup> irrespective  
6 whether children themselves or parents reported their HRQoL,<sup>[23]</sup> and also whether BMI was  
7 analysed as a categorical,<sup>[37,38]</sup> or continuous variable.<sup>[57,58]</sup>

8  
9  
10  
11  
12  
13  
14 Another relevance of this analysis is in demonstrating this association of obesity with general-  
15 health in a nationally representative sample of preschool-age children, for which literature is scant.  
16  
17  
18  
19  
20  
21  
22  
23  
24  
25  
26  
27  
28  
29  
30  
31  
32  
33  
34  
35  
36  
37  
38  
39  
40  
41  
42  
43  
44  
45  
46  
47  
48  
49  
50  
51  
52  
53  
54  
55  
56  
57  
58  
59  
60  
61  
62  
63  
64  
65  
66  
67  
68  
69  
70  
71  
72  
73  
74  
75  
76  
77  
78  
79  
80  
81  
82  
83  
84  
85  
86  
87  
88  
89  
90  
91  
92  
93  
94  
95  
96  
97  
98  
99  
100  
101  
102  
103  
104  
105  
106  
107  
108  
109  
110  
111  
112  
113  
114  
115  
116  
117  
118  
119  
120  
121  
122  
123  
124  
125  
126  
127  
128  
129  
130  
131  
132  
133  
134  
135  
136  
137  
138  
139  
140  
141  
142  
143  
144  
145  
146  
147  
148  
149  
150  
151  
152  
153  
154  
155  
156  
157  
158  
159  
160  
161  
162  
163  
164  
165  
166  
167  
168  
169  
170  
171  
172  
173  
174  
175  
176  
177  
178  
179  
180  
181  
182  
183  
184  
185  
186  
187  
188  
189  
190  
191  
192  
193  
194  
195  
196  
197  
198  
199  
200  
201  
202  
203  
204  
205  
206  
207  
208  
209  
210  
211  
212  
213  
214  
215  
216  
217  
218  
219  
220  
221  
222  
223  
224  
225  
226  
227  
228  
229  
230  
231  
232  
233  
234  
235  
236  
237  
238  
239  
240  
241  
242  
243  
244  
245  
246  
247  
248  
249  
250  
251  
252  
253  
254  
255  
256  
257  
258  
259  
260  
261  
262  
263  
264  
265  
266  
267  
268  
269  
270  
271  
272  
273  
274  
275  
276  
277  
278  
279  
280  
281  
282  
283  
284  
285  
286  
287  
288  
289  
290  
291  
292  
293  
294  
295  
296  
297  
298  
299  
300  
301  
302  
303  
304  
305  
306  
307  
308  
309  
310  
311  
312  
313  
314  
315  
316  
317  
318  
319  
320  
321  
322  
323  
324  
325  
326  
327  
328  
329  
330  
331  
332  
333  
334  
335  
336  
337  
338  
339  
340  
341  
342  
343  
344  
345  
346  
347  
348  
349  
350  
351  
352  
353  
354  
355  
356  
357  
358  
359  
360  
361  
362  
363  
364  
365  
366  
367  
368  
369  
370  
371  
372  
373  
374  
375  
376  
377  
378  
379  
380  
381  
382  
383  
384  
385  
386  
387  
388  
389  
390  
391  
392  
393  
394  
395  
396  
397  
398  
399  
400  
401  
402  
403  
404  
405  
406  
407  
408  
409  
410  
411  
412  
413  
414  
415  
416  
417  
418  
419  
420  
421  
422  
423  
424  
425  
426  
427  
428  
429  
430  
431  
432  
433  
434  
435  
436  
437  
438  
439  
440  
441  
442  
443  
444  
445  
446  
447  
448  
449  
450  
451  
452  
453  
454  
455  
456  
457  
458  
459  
460  
461  
462  
463  
464  
465  
466  
467  
468  
469  
470  
471  
472  
473  
474  
475  
476  
477  
478  
479  
480  
481  
482  
483  
484  
485  
486  
487  
488  
489  
490  
491  
492  
493  
494  
495  
496  
497  
498  
499  
500  
501  
502  
503  
504  
505  
506  
507  
508  
509  
510  
511  
512  
513  
514  
515  
516  
517  
518  
519  
520  
521  
522  
523  
524  
525  
526  
527  
528  
529  
530  
531  
532  
533  
534  
535  
536  
537  
538  
539  
540  
541  
542  
543  
544  
545  
546  
547  
548  
549  
550  
551  
552  
553  
554  
555  
556  
557  
558  
559  
560  
561  
562  
563  
564  
565  
566  
567  
568  
569  
570  
571  
572  
573  
574  
575  
576  
577  
578  
579  
580  
581  
582  
583  
584  
585  
586  
587  
588  
589  
590  
591  
592  
593  
594  
595  
596  
597  
598  
599  
600  
601  
602  
603  
604  
605  
606  
607  
608  
609  
610  
611  
612  
613  
614  
615  
616  
617  
618  
619  
620  
621  
622  
623  
624  
625  
626  
627  
628  
629  
630  
631  
632  
633  
634  
635  
636  
637  
638  
639  
640  
641  
642  
643  
644  
645  
646  
647  
648  
649  
650  
651  
652  
653  
654  
655  
656  
657  
658  
659  
660  
661  
662  
663  
664  
665  
666  
667  
668  
669  
670  
671  
672  
673  
674  
675  
676  
677  
678  
679  
680  
681  
682  
683  
684  
685  
686  
687  
688  
689  
690  
691  
692  
693  
694  
695  
696  
697  
698  
699  
700  
701  
702  
703  
704  
705  
706  
707  
708  
709  
710  
711  
712  
713  
714  
715  
716  
717  
718  
719  
720  
721  
722  
723  
724  
725  
726  
727  
728  
729  
730  
731  
732  
733  
734  
735  
736  
737  
738  
739  
740  
741  
742  
743  
744  
745  
746  
747  
748  
749  
750  
751  
752  
753  
754  
755  
756  
757  
758  
759  
760  
761  
762  
763  
764  
765  
766  
767  
768  
769  
770  
771  
772  
773  
774  
775  
776  
777  
778  
779  
780  
781  
782  
783  
784  
785  
786  
787  
788  
789  
790  
791  
792  
793  
794  
795  
796  
797  
798  
799  
800  
801  
802  
803  
804  
805  
806  
807  
808  
809  
810  
811  
812  
813  
814  
815  
816  
817  
818  
819  
820  
821  
822  
823  
824  
825  
826  
827  
828  
829  
830  
831  
832  
833  
834  
835  
836  
837  
838  
839  
840  
841  
842  
843  
844  
845  
846  
847  
848  
849  
850  
851  
852  
853  
854  
855  
856  
857  
858  
859  
860  
861  
862  
863  
864  
865  
866  
867  
868  
869  
870  
871  
872  
873  
874  
875  
876  
877  
878  
879  
880  
881  
882  
883  
884  
885  
886  
887  
888  
889  
890  
891  
892  
893  
894  
895  
896  
897  
898  
899  
900  
901  
902  
903  
904  
905  
906  
907  
908  
909  
910  
911  
912  
913  
914  
915  
916  
917  
918  
919  
920  
921  
922  
923  
924  
925  
926  
927  
928  
929  
930  
931  
932  
933  
934  
935  
936  
937  
938  
939  
940  
941  
942  
943  
944  
945  
946  
947  
948  
949  
950  
951  
952  
953  
954  
955  
956  
957  
958  
959  
960  
961  
962  
963  
964  
965  
966  
967  
968  
969  
970  
971  
972  
973  
974  
975  
976  
977  
978  
979  
980  
981  
982  
983  
984  
985  
986  
987  
988  
989  
990  
991  
992  
993  
994  
995  
996  
997  
998  
999  
1000

Another relevance of this analysis is in demonstrating this association of obesity with general-  
health in a nationally representative sample of preschool-age children, for which literature is scant.  
Though, a few have shown associations with specific paediatric conditions and admission history  
in this age-group.<sup>[24,25,59-62]</sup> A longitudinal study speculated that pre-school obesity influences a  
decline in early-age health, and then both obesity and poor-health tracks into adolescence.<sup>[63]</sup> The  
WHO recommends high priority for determinants of health inequalities during early  
development.<sup>[64]</sup>

The Lifeways previously demonstrated longitudinal association between parental socio-economic  
and lifestyle characteristics and child's BMI and waist circumference.<sup>[30]</sup> In this analysis when  
same anthropometric measures are included along-with material, psycho-social, and lifestyle  
determinants of child obesity and health, a prominent relationship emerges between children's  
anthropometric measures and health status. One possible explanation is that determinants of health  
inequalities biologically embed<sup>[15,16]</sup> in early life and child obesity is an early phenotypic  
expression of this inequality; though the continued influence of environmental factors is not  
undermined. Adult<sup>[19,20]</sup> and adolescence studies<sup>[38,39]</sup> have also shown this association to be  
independent of socio-demographic, lifestyle or health-related factors.

The observed association between BMI or waist circumference and PRH in the present analysis  
may be temporal, as demonstrated in adults.<sup>[21,22]</sup> However, this needs careful interpretation as  
both anthropometric and health data were concurrently collected, and this limitation may be  
addressed with next sweep of cohort data collection.

1  
2  
3 This analysis demonstrated that maternal health was strongly predictive of her child's health. One  
4 concern is that mother's perception of her own health may bias her perception of her child's  
5 health. However, this intergenerational association has been previously reported,<sup>[35,50,51,65-68]</sup> and  
6 reporting mothers can effectively discriminate between their own and children's  
7 health.<sup>[35,50,51,66,67,69]</sup> Several mechanisms such as inherited susceptibility, uterine environment and  
8 shared environment have been suggested for this familial aggregation pattern.<sup>[50,66,67]</sup>  
9  
10  
11  
12  
13  
14  
15

16 Maternal BMI may be related to both maternal self-rated health and child's BMI, so the observed  
17 associations in this analysis could possibly be a reflection of an association between maternal BMI  
18 and child's PRH. However, this was not observed in our analysis. Maternal BMI at both pre-  
19 pregnancy and 5-year follow-up were not associated with child's PRH at univariate level. Also,  
20 when maternal BMI was forcibly added into the multivariable model (not reported here), the  
21 observed associations did not attenuate.  
22  
23  
24  
25  
26  
27  
28  
29

30 The study has limitations in use of reported rather than measured health status and small sample  
31 size. However, it has advantages in use of lifecourse variables from pre-conception to age of 5-  
32 years, with measured BMI and waist circumference data. It also has detailed foods and nutrient  
33 data along-with other socio-economic, psycho-social and lifestyle variables for child and both  
34 parents.  
35  
36  
37  
38  
39  
40  
41

42 In conclusion, these analyses from the Lifeways cohort show that lifecourse adversities were  
43 associated with mother-reported health for preschoolers, suggesting an early life influence.  
44 Preschoolers' BMI and waist-circumference demonstrated strong negative associations with  
45 mother-reported health independent of socio-economic, psycho-social, and lifestyle factors,  
46 suggesting early biological expression of lifecourse adversities. The findings have important  
47 implications in understanding how early life environment may create inequalities in developmental  
48 health.  
49  
50  
51  
52  
53  
54  
55  
56  
57  
58  
59  
60

**Footnotes****Acknowledgements**

The Lifeways Cross-Generation Cohort Study is overseen by an interdisciplinary scientific steering group chaired by CCK, the principal investigator. The authors greatly appreciate the participation of the Lifeways cohort families.

**Contributors**

AS undertook all analyses reported in this manuscript, interpreted the findings and drafted the manuscript. CM contributed to data collection at five year follow-up, interpretation of the analysis and critical revision of the manuscript. CCK designed the study, supervised the analyses, interpretation of results and intellectual content of the manuscript. All three authors approved the final version.

**Funding**

The Lifeways Cross-Generation Cohort Study was established as part of European Science Foundation funded 'Social Variations in Health Expectancy in Europe' international research programme and its various sweeps have been funded by the Health Research Board of Ireland. Funding sources had no involvement in design, collection, analysis, interpretation, writing and submission of this manuscript.

**Competing interests**

None

### **Ethical approvals**

Ethics committees of Coombe University Hospital, Dublin, University College Hospital Galway, University College Dublin, Dublin, and the Irish College of General Practitioners, Ireland.

### **Data sharing statement**

There are no additional data available. The data manager may be contacted at [john.obrien@ucd.ie](mailto:john.obrien@ucd.ie) for more details on the Lifeways Cross-Generation Cohort Study.

### **Appendices**

The web only supplement includes eTable 1 regarding details of examined variables and eTable 2 displaying standardised odds ratios for multivariable logistic regression model.

## REFERENCES

1. Bronfenbrenner U. Ecological models of human development. In: Postlethwaite TN, Husen T, eds. *International Encyclopedia of Education*. Vol 3. 2nd ed. Oxford, England: Elsevier Sciences, Ltd., 1994: 1643-47.
2. Siddiqi A, Irwin LG, Hertzman C. Total environment assessment model for early child development. Evidence report for the WHO commission on social determinants of health. World Health Organization, 2007.  
[http://www.who.int/social\\_determinants/resources/ecd\\_kn\\_evidence\\_report\\_2007.pdf](http://www.who.int/social_determinants/resources/ecd_kn_evidence_report_2007.pdf)  
(accessed March 30, 2012).
3. Maggi S, Irwin LJ, Siddiqi A, *et al*. The social determinants of early child development: an overview. *J Paediatr Child Health* 2010;**46**(11):627-35.
4. Hertzman C, Li J, Mattes E, *et al*. Social determinants of child health and well-being [Editorial]. *Health Sociology Review* 2009;**18**(1):3-11.
5. Ben-Shlomo Y, Kuh D. A life course approach to chronic disease epidemiology: conceptual models, empirical challenges and interdisciplinary perspectives. *Int J Epidemiol* 2002;**31**(2):285-93.
6. Hertzman C, Power C, Matthews S, *et al*. Using an interactive framework of society and lifecourse to explain self-rated health in early adulthood. *Soc Sci Med* 2001;**53**(12):1575-85.

- 1  
2  
3 7. Mensah FK, Hobcraft J. Childhood deprivation, health and development: associations with  
4 adult health in the 1958 and 1970 British prospective birth cohort studies. *J Epidemiol*  
5  
6  
7  
8  
9  
10  
11  
12 8. Kestila L, Koskinen S, Martelin T, *et al.* Determinants of health in early adulthood: what is  
13 the role of parental education, childhood adversities and own education ? *Eur J Public*  
14  
15  
16  
17  
18  
19  
20  
21 9. Pollitt R, Rose K, Kaufman J. Evaluating the evidence for models of life course  
22 socioeconomic factors and cardiovascular outcomes: a systematic review. *BMC Public*  
23  
24  
25  
26  
27  
28  
29  
30 10. Kelleher CC, Tay J, Gabhainn SN. Influence on self-rated health of socio-demographic,  
31 lifestyle and affluence factors: an analysis of the Irish and international health behaviours  
32 among school-aged children (HBSC) datasets 1998. *Ir Med J* 2007;**100**(8):suppl 43-6.  
33  
34  
35  
36  
37  
38  
39 11. Stein RE, Siegel MJ, Bauman LJ. Double jeopardy: what social risk adds to biomedical  
40 risk in understanding child health and health care utilization. *Acad Pediatr* 2010;**10**(3):165-  
41  
42  
43  
44  
45  
46  
47 12. Stevens GD. Gradients in the health status and developmental risks of young children: the  
48 combined influences of multiple social risk factors. *Matern Child Health J* 2006;**10**(2):187-  
49  
50  
51  
52  
53  
54  
55  
56  
57  
58  
59  
60

- 1  
2  
3 13. Krieger N. Theories for social epidemiology in the 21st century: an ecosocial perspective.  
4  
5 *Int J Epidemiol* 2001;**30**(4):668-77.  
6  
7  
8  
9  
10 14. Krieger N. A glossary for social epidemiology. *J Epidemiol Community Health*  
11  
12 2001;**55**(10):693-700.  
13  
14  
15  
16 15. Hertzman C. The biological embedding of early experience and its effects on health in  
17  
18 adulthood. *Ann N Y Acad Sci* 1999;**896**(1):85-95.  
19  
20  
21  
22  
23 16. Hertzman C, Boyce T. How experience gets under the skin to create gradients in  
24  
25 developmental health. *Annu Rev Public Health* 2010;**31**:329-47 C1-C3.  
26  
27  
28  
29 17. Butland B, Jebb S, Kopelman P, *et al.* Foresight. Tackling obesities: future choices —  
30  
31 Project report. London: Government Office for Science, 2007.  
32  
33  
34 <http://www.bis.gov.uk/assets/foresight/docs/obesity/17.pdf> (accessed March 30, 2012).  
35  
36  
37  
38 18. Aboderin I, Kalache A, Ben-Shlomo Y, *et al.* Life course perspectives on coronary heart  
39  
40 disease, stroke and diabetes: key issues and implications for policy and research. Geneva:  
41  
42 World Health Organization, 2002.  
43  
44  
45 [http://whqlibdoc.who.int/hq/2002/WHO\\_NMH\\_NPH\\_02.1.pdf](http://whqlibdoc.who.int/hq/2002/WHO_NMH_NPH_02.1.pdf) (accessed March 30, 2012).  
46  
47  
48  
49 19. Molarius A, Berglund K, Eriksson C, *et al.* Socioeconomic conditions, lifestyle factors, and  
50  
51 self-rated health among men and women in Sweden. *Eur J Public Health* 2007;**17**(2):125-  
52  
53 33.  
54  
55  
56  
57  
58  
59  
60



- 1  
2  
3  
4  
5  
6  
7  
8  
9  
10  
11  
12  
13  
14  
15  
16  
17  
18  
19  
20  
21  
22  
23  
24  
25  
26  
27  
28  
29  
30  
31  
32  
33  
34  
35  
36  
37  
38  
39  
40  
41  
42  
43  
44  
45  
46  
47  
48  
49  
50  
51  
52  
53  
54  
55  
56  
57  
58  
59  
60
20. Prosper M-H, Moczulski VL, Qureshi A. Obesity as a predictor of self-rated health. *Am J Health Behav* 2009;**33**(3):319-29.
21. Svedberg P, Bardage C, Sandin S, *et al.* A prospective study of health, life-style and psychosocial predictors of self-rated health. *Eur J Epidemiol* 2006;**21**(10):767-76.
22. Zajacova A, Burgard SA. Body weight and health from early to mid-adulthood: a longitudinal analysis. *J Health Soc Behav* 2010;**51**(1):92-107.
23. Tsiros MD, Olds T, Buckley JD, *et al.* Health-related quality of life in obese children and adolescents. *Int J Obes (Lond)* 2009;**33**(4):387-400.
24. Wake M, Hardy P, Sawyer MG, *et al.* Comorbidities of overweight/obesity in Australian preschoolers: a cross-sectional population study. *Arch Dis Child* 2008;**93**(6):502-07.
25. Skinner AC, Perrin EM, Steiner MJ. Healthy for now? A cross-sectional study of the comorbidities in obese preschool children in the United States. *Clin Pediatr (Phila)* 2010;**49**(7):648-55.
26. O'Mahony D, Fallon UB, Hannon F, *et al.* The Lifeways Cross-Generation Study: design, recruitment and data management considerations. *Ir Med J* 2007;**100**(8):suppl 3-6.
27. Niedhammer I, O'Mahony D, Daly S, *et al.* Occupational predictors of pregnancy outcomes in Irish working women in the Lifeways cohort. *BJOG* 2009;**116**(7):943-52.

- 1  
2  
3 28. Murrin CM, Kelly GE, Tremblay RE, *et al.* Body mass index and height over three  
4 generations: evidence from the Lifeways Cross-Generational Cohort Study. *BMC Public*  
5 *Health* 2012;**12**:81 e-pub ahead of print 25 January 2012; doi: 10.1186/1471-2458-1112-  
6 1181.  
7  
8  
9  
10  
11  
12  
13  
14 29. National Nutrition Surveillance Centre. Dietary habits of the Irish population: results from  
15 SLÁN, Annual Report 2003. Dublin: National Nutritional Surveillance Centre, Department  
16 of Public Health Medicine and Epidemiology, University College Dublin, Dublin and  
17 Health Promotion Unit, Department of Health and Children, Dublin, 2003.  
18  
19  
20  
21  
22  
23  
24  
25 30. Murrin C. Maternal factors during pregnancy contributing to early life risk of childhood  
26 obesity [PhD Thesis]. Dublin: University College Dublin, 2011.  
27  
28  
29  
30  
31  
32 31. Harrington J. Validation of a food frequency questionnaire as a tool for assessing nutrient  
33 intake [MA Thesis]. Galway: National University of Ireland, 1997.  
34  
35  
36  
37  
38  
39 32. Gregory J, Collins D, Davies P, *et al.* National Diet and Nutrition Survey: children aged  
40 1.5 - 4.5 years. Volume 1: Report of the diet and nutrition survey. London: HMSO, 1995.  
41  
42  
43  
44  
45 33. Food Standards Agency. McCance and Widdowson's The composition of foods, sixth  
46 summary edition. Cambridge: Royal Society of Chemistry, 2002.  
47  
48  
49  
50  
51  
52 34. FFQ\_Software version 1.0. Dublin: National Nutrition Surveillance Centre, School of  
53 Public Health and Population Science, University College Dublin, 2007.  
54  
55  
56  
57  
58  
59  
60

- 1  
2  
3 35. Monette S, Séguin L, Gauvin L, *et al.* Validation of a measure of maternal perception of  
4 the child's health status. *Child Care Health Dev* 2007;**33**(4):472-81.  
5  
6  
7  
8  
9  
10 36. Katz MH. *Multivariable analysis: a practical guide for clinicians and public health*  
11 *researchers*. 3rd ed. New York: Cambridge University Press, 2011.  
12  
13  
14  
15  
16 37. Wake M, Salmon L, Waters E, *et al.* Parent-reported health status of overweight and obese  
17 Australian primary school children: a cross-sectional population survey. *Int J Obes Relat*  
18 *Metab Disord* 2002;**26**(5): 717-24.  
19  
20  
21  
22  
23  
24  
25 38. Swallen KC, Reither EN, Haas SA, *et al.* Overweight, obesity, and health-related quality of  
26 life among adolescents: the National Longitudinal Study of Adolescent Health. *Pediatrics*  
27 2005;**115**(2):340-47.  
28  
29  
30  
31  
32  
33  
34 39. Vingilis ER, Wade TJ, Seeley JS. Predictors of adolescent self-rated health. Analysis of the  
35 National Population Health Survey. *Can J Public Health* 2002;**93**(3):193-97.  
36  
37  
38  
39  
40 40. Bjorner J, Fayers P, Idler E. Self-rated health. In: Fayers PM, Hays RD, eds. *Assessing*  
41 *quality of life in clinical trials: methods and practice*. 2nd edn. New York: Oxford  
42 University Press, 2005:309-24.  
43  
44  
45  
46  
47  
48  
49 41. Kelleher CC, Whelan J, Daly L, *et al.* Socio-demographic, environmental, lifestyle and  
50 psychosocial factors predict self rated health in Irish Travellers, a minority nomadic  
51 population. *Health Place* 2012;**18**(2):330-38.  
52  
53  
54  
55  
56  
57  
58  
59  
60

- 1  
2  
3 42. Kelleher CC, Friel S, Nic Gabhainn S, *et al.* Socio-demographic predictors of self-rated  
4 health in the Republic of Ireland: findings from the National Survey on Lifestyle, Attitudes  
5 and Nutrition, SLAN. *Soc Sci Med* 2003;**57**(3):477-86.  
6  
7  
8  
9  
10  
11  
12 43. Eiser C, Morse R. Can parents rate their child's health-related quality of life? Results of a  
13 systematic review. *Qual Life Res* 2001;**10**(4):347-57.  
14  
15  
16  
17  
18 44. Upton P, Lawford J, Eiser C. Parent-child agreement across child health-related quality of  
19 life instruments: a review of the literature. *Qual Life Res* 2008;**17**(6):895-913.  
20  
21  
22  
23  
24  
25 45. Davis E, Nicolas C, Waters E, *et al.* Parent-proxy and child self-reported health-related  
26 quality of life: using qualitative methods to explain the discordance. *Qual Life Res*  
27 2007;**16**(5):863-71.  
28  
29  
30  
31  
32  
33  
34 46. Theunissen NC, Vogels TG, Koopman HM, *et al.* The proxy problem: child report versus  
35 parent report in health-related quality of life research. *Qual Life Res* 1998;**7**(5):387-97.  
36  
37  
38  
39  
40  
41 47. Varni JW, Limbers CA, Burwinkle TM. Parent proxy-report of their children's health-  
42 related quality of life: an analysis of 13,878 parents' reliability and validity across age  
43 subgroups using the PedsQL 4.0 Generic Core Scales. *Health Qual Life Outcomes*  
44 2007;**5**:2.  
45  
46  
47  
48  
49  
50  
51  
52 48. Spencer NJ, Coe C. The development and validation of a measure of parent-reported child  
53 health and morbidity: the Warwick Child Health and Morbidity Profile. *Child Care Health*  
54 *Dev* 1996;**22**(6):367-79.  
55  
56  
57  
58  
59  
60

- 1  
2  
3  
4  
5 49. Spencer NJ, Coe C. Validation of the Warwick Child Health and Morbidity Profile in  
6 routine child health surveillance. *Child Care Health Dev* 2000;**26**(4):323-36.  
7  
8  
9  
10  
11 50. McCormick MC, Brooks-Gunn J, Workman-Daniels K, *et al.* Maternal rating of child  
12 health at school age: does the vulnerable child syndrome persist ? *Pediatrics*  
13 1993;**92**(3):380-88.  
14  
15  
16  
17  
18  
19  
20 51. McCormick MC, Brooks-Gunn J, Shorter T, *et al.* Factors associated with maternal rating  
21 of infant health in central Harlem. *J Dev Behav Pediatr* 1989;**10**(3):139-44.  
22  
23  
24  
25  
26  
27 52. McCormick MC, Athreya BH, Bernbaum JC, *et al.* Preliminary observations on maternal  
28 rating of health of children: data from three subspecialty clinics. *J Clin Epidemiol*  
29 1988;**41**(4):323-29.  
30  
31  
32  
33  
34  
35  
36 53. Lynch JL. Infant health, race/ethnicity, and early educational outcomes using the ECLS-B.  
37 *Sociol Inq* 2011;**81**(4):499-526.  
38  
39  
40  
41  
42 54. Gilman SE, McCormick MC. Insights from life course epidemiology. *Acad Pediatr*  
43 2010;**10**(3):159-60.  
44  
45  
46  
47  
48  
49 55. Smith KW, Avis NE, Assmann SF. Distinguishing between quality of life and health status  
50 in quality of life research: a meta-analysis. *Qual Life Res* 1999;**8**(5):447-59.  
51  
52  
53  
54  
55  
56  
57  
58  
59  
60

- 1  
2  
3 56. Pinhas-Hamiel O, Singer S, Pilpel N, *et al.* Health-related quality of life among children  
4 and adolescents: associations with obesity. *Int J Obes (Lond)* 2006;**30**(2):267-72.  
5  
6  
7  
8  
9  
10 57. Williams J, Wake M, Hesketh K, *et al.* Health-related quality of life of overweight and  
11 obese children. *JAMA* 2005;**293**(1):70-6.  
12  
13  
14  
15  
16 58. de Beer M, Hofsteenge GH, Koot HM, *et al.* Health-related-quality-of-life in obese  
17 adolescents is decreased and inversely related to BMI. *Acta Paediatr* 2007;**96**(5):710-14.  
18  
19  
20  
21  
22  
23 59. Shibli R, Rubin L, Akons H, *et al.* Morbidity of overweight ( $\geq 85$ th percentile) in the first 2  
24 years of life. *Pediatrics* 2008;**122**(2):267-72.  
25  
26  
27  
28  
29  
30 60. Suglia SF, Chambers EC, Rosario A, *et al.* Asthma and obesity in three-year-old urban  
31 children: role of sex and home environment. *J Pediatr* 2011;**159**(1):14-20.e11.  
32  
33  
34  
35  
36 61. Tai A, Volkmer R, Burton A. Association between asthma symptoms and obesity in  
37 preschool (4-5 year old) children. *J Asthma* 2009;**46**(4):362-65.  
38  
39  
40  
41  
42  
43 62. Slining M, Adair LS, Goldman BD, *et al.* Infant overweight is associated with delayed  
44 motor development. *J Pediatr* 2010;**157**(1):20-5.e21.  
45  
46  
47  
48  
49  
50 63. Williams JW, Canterford L, Hesketh KD, *et al.* Changes in body mass index and health  
51 related quality of life from childhood to adolescence. *Int J Pediatr Obes* 2011;**6**(2-2):e442-  
52 e448.  
53  
54  
55  
56  
57  
58  
59  
60

- 1  
2  
3 64. Marmot M, Friel S, Bell R, *et al*. Closing the gap in a generation: health equity through  
4 action on the social determinants of health. *Lancet* 2008;**372**(9650):1661-69.  
5  
6  
7  
8  
9  
10 65. Coneus K, Spiess CK. The intergenerational transmission of health in early childhood -  
11 evidence from the German Socio-Economic Panel Study. *Econ Hum Biol* 2012;**10**(1):89-  
12 97.  
13  
14  
15  
16  
17  
18 66. Case A, Lubotsky D, Paxson C. Economic status and health in childhood: the origins of the  
19 gradient. *Am Econ Rev* 2002;**92**(5):1308-34.  
20  
21  
22  
23  
24  
25 67. Silburn SR, Zubrick SR, Garton A, *et al*. Western Australia Child Health Survey: family  
26 and community health. Perth, Western Australia: Australian Bureau of Statistics and the  
27 TVW Telethon Institute for Child Health Research, 1996.  
28  
29  
30  
31  
32  
33  
34 68. Waters E, Doyle J, Wolfe R, *et al*. Influence of parental gender and self-reported health and  
35 illness on parent-reported child health. *Pediatrics* 2000;**106**(6):1422-28.  
36  
37  
38  
39  
40  
41 69. Dadds MR, Stein RE, Silver EJ. The role of maternal psychological adjustment in the  
42 measurement of children's functional status. *J Pediatr Psychol* 1995;**20**(4):527-44.  
43  
44  
45  
46  
47  
48  
49  
50  
51  
52  
53  
54  
55  
56  
57  
58  
59  
60

**LICENCE FOR PUBLICATION STATEMENT**

The Corresponding Author has the right to grant on behalf of all authors and does grant on behalf of all authors, an exclusive licence (or non-exclusive for government employees) on a worldwide basis to the BMJ Group and co-owners or contracting owning societies (where published by the BMJ Group on their behalf), and its Licensees to permit this article (if accepted) to be published in any BMJ Group products and to exploit all subsidiary rights, as set out in our licence.

For peer review only



eTable 1: Lifecourse variables examined for relationship with children's parent-rated health, PRH

| Independent Variables                                                                                      | Time                       | Categories                                                                                                            |
|------------------------------------------------------------------------------------------------------------|----------------------------|-----------------------------------------------------------------------------------------------------------------------|
| <b>Child's Individual characteristics</b>                                                                  |                            |                                                                                                                       |
| <b>Demographic and Anthropometric</b>                                                                      |                            |                                                                                                                       |
| Birth-weight standardised for gestational age (g)                                                          | Measured at birth          | continuous measure                                                                                                    |
| Age at 5-year follow-up (years)                                                                            | At 5-yr follow-up          | continuous measure                                                                                                    |
| Gender                                                                                                     |                            | Male, Female                                                                                                          |
| Body Mass Index (BMI) kg/m <sup>2</sup>                                                                    | Measured at 5-yr follow-up | continuous measure<br>Also as obese versus overweight or normal using IOTF definitions                                |
| Waist Circumference (cm)                                                                                   | Measured at 5-yr follow-up | continuous measure                                                                                                    |
| Height (cm)                                                                                                | Measured at 5-yr follow-up | continuous measure                                                                                                    |
| <b>Lifestyle/Nutrition</b>                                                                                 |                            |                                                                                                                       |
| Breastfeeding                                                                                              | At infancy                 | breastfed or not                                                                                                      |
| Top shelf servings per day                                                                                 | At 5-yr follow-up          | 5 <sup>th</sup> Quintile (>6.47 servings) versus 1-4 Quintiles.                                                       |
| Fruits & Vegetables shelf servings /day                                                                    | At 5-yr follow-up          | 1 <sup>st</sup> Quintile (<2.1 servings) versus 2-5 Quintiles                                                         |
| Total Energy intake (kilocalories/day)                                                                     | At 5-yr follow-up          | 5 <sup>th</sup> Quintile (>1794 kcal) versus 1-4 Quintiles                                                            |
| Total Fats intake (grams/day)                                                                              | At 5-yr follow-up          | 5 <sup>th</sup> Quintile (>62.9g) versus 1-4 Quintiles                                                                |
| <b>Family characteristics</b>                                                                              |                            |                                                                                                                       |
| <b>Socio-Economic</b>                                                                                      |                            |                                                                                                                       |
| Household weekly income                                                                                    | At 5-yr follow-up          | composite family income more or less than 760 Euros a week                                                            |
| Entitlement to General Medical Card scheme, a means tested healthcare benefits scheme                      | At 5-yr follow-up          | Families entitled or not to General Medical Card                                                                      |
| <b>Psycho-Social</b>                                                                                       |                            |                                                                                                                       |
| Fathers' participation (Family stability)                                                                  | Early pregnancy stage      | Families whose fathers participated in the study versus families whose fathers did not                                |
| Mother's marital status (Family structure)                                                                 | At 5-yr follow-up          | Married or cohabiting versus single, separated, divorced or widowed.                                                  |
| Elder children in family [Parity was a proxy measure for presence of elder siblings to the Lifeways child] | Early pregnancy stage      | nullipara versus one or more para                                                                                     |
| Support from spouse or partner                                                                             | At 5-yr follow-up          | Mothers perceived "a lot" of support from spouse or partners versus perceived receiving "some, so-so, little" support |
| Support from parents                                                                                       | At 5-yr follow-up          | Mothers perceived "a lot" of support from parents versus                                                              |

|    |                                                 |                   |                               |
|----|-------------------------------------------------|-------------------|-------------------------------|
| 1  |                                                 |                   |                               |
| 2  |                                                 |                   |                               |
| 3  |                                                 |                   | perceived receiving “some,    |
| 4  |                                                 |                   | so-so, little” support        |
| 5  | Support from children, inclusive Lifeways child | At 5-yr follow-up | Mothers perceived “a lot” of  |
| 6  |                                                 |                   | support from children versus  |
| 7  |                                                 |                   | perceived receiving “some,    |
| 8  |                                                 |                   | so-so, little” support        |
| 9  | Support from close relatives                    | At 5-yr follow-up | Mothers perceived “a lot” of  |
| 10 |                                                 |                   | support from relatives versus |
| 11 |                                                 |                   | perceived receiving “some,    |
| 12 |                                                 |                   | so-so, little” support        |

### Maternal characteristics

#### **Demographic and Anthropometric**

|    |                                              |                                                       |                                                                                             |
|----|----------------------------------------------|-------------------------------------------------------|---------------------------------------------------------------------------------------------|
| 15 | Age at 5-year follow-up (years)              | At 5-yr follow-up                                     | continuous measure                                                                          |
| 16 | Pre-pregnancy BMI (kg/m <sup>2</sup> )       | Pre-pregnancy,<br>Self-reported in<br>early pregnancy | continuous measure<br>Also as obese versus<br>overweight or normal using<br>WHO definitions |
| 17 |                                              |                                                       |                                                                                             |
| 18 |                                              |                                                       |                                                                                             |
| 19 |                                              |                                                       |                                                                                             |
| 20 |                                              |                                                       |                                                                                             |
| 21 | BMI at 5-year follow-up (kg/m <sup>2</sup> ) | Measured at<br>5-yr follow-up                         | continuous measure<br>Also as obese versus<br>overweight or normal using<br>WHO definitions |
| 22 |                                              |                                                       |                                                                                             |
| 23 |                                              |                                                       |                                                                                             |
| 24 |                                              |                                                       |                                                                                             |
| 25 | Waist Circumference at 5-year follow-up (cm) | Measured at<br>5-yr follow-up                         | continuous measure                                                                          |
| 26 |                                              |                                                       |                                                                                             |
| 27 | Height at 5-year follow-up (cm)              | Measured at<br>5-yr follow-up                         | continuous measure                                                                          |
| 28 |                                              |                                                       |                                                                                             |

#### **Lifestyle/Nutrition**

|    |                                         |                          |                                                                    |
|----|-----------------------------------------|--------------------------|--------------------------------------------------------------------|
| 29 |                                         |                          |                                                                    |
| 30 | Smoking during pregnancy                | Early pregnancy<br>stage | Current smoker or not                                              |
| 31 |                                         |                          |                                                                    |
| 32 | Smoking at 5-year follow-up             | At 5-yr follow-up        | Current smoker or not                                              |
| 33 |                                         |                          |                                                                    |
| 34 | Top shelf servings per day              | At 5-yr follow-up        | 5 <sup>th</sup> Quintile (>8.35 servings)<br>versus 1-4 Quintiles. |
| 35 |                                         |                          |                                                                    |
| 36 | Fruits & Vegetables shelf servings /day | At 5-yr follow-up        | 1 <sup>st</sup> Quintile (<4.5 servings)<br>versus 2-5 Quintiles   |
| 37 |                                         |                          |                                                                    |
| 38 | Total Energy intake (kilocalories/day)  | At 5-yr follow-up        | 5 <sup>th</sup> Quintile (>2570.9 kcal)<br>versus 1-4 Quintiles    |
| 39 |                                         |                          |                                                                    |
| 40 | Total Fats intake (grams/day)           | At 5-yr follow-up        | 5 <sup>th</sup> Quintile (>106.0 g) versus<br>1-4 Quintiles        |
| 41 |                                         |                          |                                                                    |

#### **Socio-Economic**

|    |                   |                          |                                                        |
|----|-------------------|--------------------------|--------------------------------------------------------|
| 42 |                   |                          |                                                        |
| 43 | Education level   | Early pregnancy<br>stage | Third level versus lower<br>levels of education status |
| 44 |                   |                          |                                                        |
| 45 | Employment status | At 5-yr follow-up        | Non-earning versus<br>Employed versus Self<br>employed |
| 46 |                   |                          |                                                        |
| 47 |                   |                          |                                                        |

#### **Health**

|    |                                     |                   |                                                                                                                              |
|----|-------------------------------------|-------------------|------------------------------------------------------------------------------------------------------------------------------|
| 48 |                                     |                   |                                                                                                                              |
| 49 | Self-rated health status of mothers | At 5-yr follow-up | Relatively Positive<br>(“Excellent” or “Very Good”)<br>versus Relatively Negative<br>(“Poor” / “Fair” / “Good”)<br>responses |
| 50 |                                     |                   |                                                                                                                              |
| 51 |                                     |                   |                                                                                                                              |
| 52 |                                     |                   |                                                                                                                              |
| 53 |                                     |                   |                                                                                                                              |
| 54 |                                     |                   |                                                                                                                              |

### Paternal Characteristics

#### **Anthropometric**

|    |                                              |             |                    |
|----|----------------------------------------------|-------------|--------------------|
| 55 |                                              |             |                    |
| 56 |                                              |             |                    |
| 57 | BMI at 5-year follow-up (kg/m <sup>2</sup> ) | Measured at | continuous measure |
| 58 |                                              |             |                    |
| 59 |                                              |             |                    |
| 60 |                                              |             |                    |

|    |                                                |                   |                              |
|----|------------------------------------------------|-------------------|------------------------------|
| 1  |                                                |                   |                              |
| 2  |                                                |                   |                              |
| 3  |                                                | 5-yr follow-up    |                              |
| 4  | Waist Circumference at 5-year follow-up (cm)   | Measured at       | continuous measure           |
| 5  |                                                | 5-yr follow-up    |                              |
| 6  | Height at 5-year follow-up (cm)                | Measured at       | continuous measure           |
| 7  |                                                | 5-yr follow-up    |                              |
| 8  | <b>Lifestyle</b>                               |                   |                              |
| 9  | Smoking at 5-year follow-up                    | At 5-yr follow-up | Current smoker or not        |
| 10 | <b>Socio-Economic</b>                          |                   |                              |
| 11 | Education level                                | Early pregnancy   | Third level versus lower     |
| 12 |                                                | stage             | levels of education status   |
| 13 | Employment status                              | At 5-yr follow-up | Non-earning versus           |
| 14 |                                                |                   | Employed versus Self         |
| 15 |                                                |                   | employed                     |
| 16 |                                                |                   |                              |
| 17 | <b>Health</b>                                  |                   |                              |
| 18 | Self-rated health status of fathers (in proxy) | At 5-yr follow-up | Relatively Positive          |
| 19 |                                                |                   | ("Excellent" or "Very Good") |
| 20 |                                                |                   | versus Relatively Negative   |
| 21 |                                                |                   | ("Poor"/ "Fair" /"Good")     |
| 22 |                                                |                   | responses                    |
| 23 |                                                |                   |                              |
| 24 |                                                |                   |                              |
| 25 |                                                |                   |                              |
| 26 |                                                |                   |                              |
| 27 |                                                |                   |                              |
| 28 |                                                |                   |                              |
| 29 |                                                |                   |                              |
| 30 |                                                |                   |                              |
| 31 |                                                |                   |                              |
| 32 |                                                |                   |                              |
| 33 |                                                |                   |                              |
| 34 |                                                |                   |                              |
| 35 |                                                |                   |                              |
| 36 |                                                |                   |                              |
| 37 |                                                |                   |                              |
| 38 |                                                |                   |                              |
| 39 |                                                |                   |                              |
| 40 |                                                |                   |                              |
| 41 |                                                |                   |                              |
| 42 |                                                |                   |                              |
| 43 |                                                |                   |                              |
| 44 |                                                |                   |                              |
| 45 |                                                |                   |                              |
| 46 |                                                |                   |                              |
| 47 |                                                |                   |                              |
| 48 |                                                |                   |                              |
| 49 |                                                |                   |                              |
| 50 |                                                |                   |                              |
| 51 |                                                |                   |                              |
| 52 |                                                |                   |                              |
| 53 |                                                |                   |                              |
| 54 |                                                |                   |                              |
| 55 |                                                |                   |                              |
| 56 |                                                |                   |                              |
| 57 |                                                |                   |                              |
| 58 |                                                |                   |                              |
| 59 |                                                |                   |                              |
| 60 |                                                |                   |                              |

eTable 2: Multivariable Logistic Regression model for predictors of children’s relatively positive parent-rated health, PRH (N=303)

|                                                            | Relatively Positive PRH      |         | Relatively Positive PRH     |         | Relatively Positive PRH    |         |
|------------------------------------------------------------|------------------------------|---------|-----------------------------|---------|----------------------------|---------|
|                                                            | BMI Categorical <sup>1</sup> |         | BMI Continuous <sup>2</sup> |         | WC Continuous <sup>3</sup> |         |
|                                                            | Std OR                       | p-value | Std OR                      | p-value | Std OR                     | p-value |
| <b>Child's Individual Characteristics</b>                  |                              |         |                             |         |                            |         |
| BMI [IOTF], Obese† vs Overweight / Normal                  | 1.53*                        | 0.01    |                             |         |                            |         |
| BMI kg/m <sup>2</sup> [Continuous]                         |                              |         | 0.58**                      | 0.009   |                            |         |
| Waist Circumference cm [Continuous]                        |                              |         |                             |         | 0.60*                      | 0.02    |
| Fats gm [Quintiles], Q5+ vs Q1-4                           | 1.20                         | 0.50    | 1.18                        | 0.55    | 1.12                       | 0.68    |
| Top shelf servings/d [Quintiles], Q5+ vs Q1-4              | 1.09                         | 0.76    | 1.11                        | 0.69    | 1.11                       | 0.70    |
| Fruits Veg shelf servings/d [Quintiles], Q1+ vs Q2-5       | 1.43                         | 0.13    | 1.49                        | 0.10    | 1.46                       | 0.12    |
| <b>Family Characteristics</b>                              |                              |         |                             |         |                            |         |
| Household Weekly Income, Less† vs High                     | 1.34                         | 0.26    | 1.30                        | 0.31    | 1.32                       | 0.29    |
| Entitlement to General Medical, Card Yes† vs No            | 0.98                         | 0.93    | 1.01                        | 0.97    | 1.01                       | 0.95    |
| Fathers' Participation, No† vs Yes                         | 1.37                         | 0.23    | 1.36                        | 0.23    | 1.43                       | 0.17    |
| Support from Spouse/Partner, Less† vs More                 | 0.86                         | 0.59    | 0.84                        | 0.53    | 0.88                       | 0.63    |
| Support from Parents, Less† vs More                        | 1.30                         | 0.32    | 1.41                        | 0.20    | 1.42                       | 0.19    |
| Support from Children, Less† vs More                       | 1.07                         | 0.80    | 1.13                        | 0.65    | 1.11                       | 0.70    |
| Support from Close Relatives, Less† vs More                | 0.93                         | 0.81    | 0.93                        | 0.79    | 0.92                       | 0.79    |
| <b>Maternal Characteristics</b>                            |                              |         |                             |         |                            |         |
| Energy Kcal [Quintiles], Q5+ vs Q1-4                       | 1.28                         | 0.50    | 1.31                        | 0.47    | 1.19                       | 0.61    |
| Fats gm [Quintiles], Q5+ vs Q1-4                           | 0.88                         | 0.76    | 0.82                        | 0.62    | 0.97                       | 0.93    |
| Top shelf servings/d [Quintiles], Q5+ vs Q1-4              | 1.03                         | 0.91    | 1.11                        | 0.69    | 1.07                       | 0.80    |
| Education, Lower† vs Third level                           | 1.15                         | 0.58    | 1.16                        | 0.56    | 1.21                       | 0.45    |
| Self reported health status, Rel.Negative† vs Rel.Positive | 1.88**                       | 0.008   | 1.92**                      | 0.006   | 1.88**                     | 0.007   |
| <b>Paternal Characteristics</b>                            |                              |         |                             |         |                            |         |
| Current Smoking status, Yes† vs No                         | 1.15                         | 0.55    | 1.13                        | 0.62    | 1.21                       | 0.42    |
| Education, Lower† vs Third level                           | 0.85                         | 0.55    | 0.90                        | 0.70    | 0.92                       | 0.75    |
| Employment, Non-earning † vs Self employed                 | 1.33                         | 0.24    | 1.29                        | 0.30    | 1.32                       | 0.27    |
| Self reported health status, Rel.Negative† vs Rel.Positive | 1.20                         | 0.46    | 1.22                        | 0.42    | 1.18                       | 0.50    |

Std OR=Standardised Odds Ratio, all variables rescaled to have a mean of zero and a standard deviation of one; \*\*p<0.01 (2-tailed), \*p<0.05 (2-tailed)

†Reference category (Std OR=1); Rel.Negative=Relatively Negative, Rel.Positive=Relatively Positive

<sup>1</sup>Child BMI as a categorical variable

<sup>2</sup>Child BMI as a continuous variable

<sup>3</sup>Child waist circumference as a continuous variable

STROBE Statement: Childhood obesity is persistent as a predictor of preschoolers' parent-rated health accounting for social inequalities - Lifeways cross-generation cohort study

|                           | Item No | Recommendation                                                                                                                                                                                    | Done |
|---------------------------|---------|---------------------------------------------------------------------------------------------------------------------------------------------------------------------------------------------------|------|
| <b>Title and abstract</b> | 1       | (a) Indicate the study's design with a commonly used term in the title or the abstract                                                                                                            | ✓    |
|                           |         | (b) Provide in the abstract an informative and balanced summary of what was done and what was found                                                                                               | ✓    |
| <b>Introduction</b>       |         |                                                                                                                                                                                                   |      |
| Background/rationale      | 2       | Explain the scientific background and rationale for the investigation being reported                                                                                                              | ✓    |
| Objectives                | 3       | State specific objectives, including any prespecified hypotheses                                                                                                                                  | ✓    |
| <b>Methods</b>            |         |                                                                                                                                                                                                   |      |
| Study design              | 4       | Present key elements of study design early in the paper                                                                                                                                           | ✓    |
| Setting                   | 5       | Describe the setting, locations, and relevant dates, including periods of recruitment, exposure, follow-up, and data collection                                                                   | ✓    |
| Participants              | 6       | (a) Give the eligibility criteria, and the sources and methods of selection of participants. Describe methods of follow-up                                                                        | ✓    |
|                           |         | (b) For matched studies, give matching criteria and number of exposed and unexposed                                                                                                               |      |
| Variables                 | 7       | Clearly define all outcomes, exposures, predictors, potential confounders, and effect modifiers. Give diagnostic criteria, if applicable                                                          | ✓    |
| Data sources/measurement  | 8*      | For each variable of interest, give sources of data and details of methods of assessment (measurement). Describe comparability of assessment methods if there is more than one group              | ✓    |
| Bias                      | 9       | Describe any efforts to address potential sources of bias                                                                                                                                         | ✓    |
| Study size                | 10      | Explain how the study size was arrived at                                                                                                                                                         | ✓    |
| Quantitative variables    | 11      | Explain how quantitative variables were handled in the analyses. If applicable, describe which groupings were chosen and why                                                                      | ✓    |
| Statistical methods       | 12      | (a) Describe all statistical methods, including those used to control for confounding                                                                                                             | ✓    |
|                           |         | (b) Describe any methods used to examine subgroups and interactions                                                                                                                               | ✓    |
|                           |         | (c) Explain how missing data were addressed                                                                                                                                                       | ✓    |
|                           |         | (d) If applicable, explain how loss to follow-up was addressed                                                                                                                                    | ✓    |
|                           |         | (e) Describe any sensitivity analyses                                                                                                                                                             | ✓    |
| <b>Results</b>            |         |                                                                                                                                                                                                   |      |
| Participants              | 13*     | (a) Report numbers of individuals at each stage of study—eg numbers potentially eligible, examined for eligibility, confirmed eligible, included in the study, completing follow-up, and analysed | ✓    |
|                           |         | (b) Give reasons for non-participation at each stage                                                                                                                                              | ✓    |
|                           |         | (c) Consider use of a flow diagram                                                                                                                                                                |      |
| Descriptive data          | 14*     | (a) Give characteristics of study participants (eg demographic, clinical, social) and information on exposures and potential confounders                                                          | ✓    |
|                           |         | (b) Indicate number of participants with missing data for each variable of interest                                                                                                               | ✓    |
|                           |         | (c) Summarise follow-up time (eg, average and total amount)                                                                                                                                       | ✓    |
| Outcome data              | 15*     | Report numbers of outcome events or summary measures over time                                                                                                                                    | ✓    |
| Main results              | 16      | (a) Give unadjusted estimates and, if applicable, confounder-adjusted                                                                                                                             | ✓    |

|    |                          |                                                                                    |   |
|----|--------------------------|------------------------------------------------------------------------------------|---|
| 1  |                          | estimates and their precision (eg, 95% confidence interval). Make clear            |   |
| 2  |                          | which confounders were adjusted for and why they were included                     |   |
| 3  |                          | (b) Report category boundaries when continuous variables were categorized          | ✓ |
| 4  |                          | (c) If relevant, consider translating estimates of relative risk into absolute     |   |
| 5  |                          | risk for a meaningful time period                                                  |   |
| 6  |                          |                                                                                    |   |
| 7  | Other analyses           | 17 Report other analyses done—eg analyses of subgroups and interactions, and       | ✓ |
| 8  |                          | sensitivity analyses                                                               |   |
| 9  |                          |                                                                                    |   |
| 10 | <b>Discussion</b>        |                                                                                    |   |
| 11 | Key results              | 18 Summarise key results with reference to study objectives                        | ✓ |
| 12 | Limitations              | 19 Discuss limitations of the study, taking into account sources of potential bias | ✓ |
| 13 |                          | or imprecision. Discuss both direction and magnitude of any potential bias         |   |
| 14 |                          |                                                                                    |   |
| 15 | Interpretation           | 20 Give a cautious overall interpretation of results considering objectives,       | ✓ |
| 16 |                          | limitations, multiplicity of analyses, results from similar studies, and other     |   |
| 17 |                          | relevant evidence                                                                  |   |
| 18 |                          |                                                                                    |   |
| 19 | Generalisability         | 21 Discuss the generalisability (external validity) of the study results           | ✓ |
| 20 |                          |                                                                                    |   |
| 21 | <b>Other information</b> |                                                                                    |   |
| 22 | Funding                  | 22 Give the source of funding and the role of the funders for the present study    | ✓ |
| 23 |                          | and, if applicable, for the original study on which the present article is based   |   |

\*Give information separately for exposed and unexposed groups.

**Note:** An Explanation and Elaboration article discusses each checklist item and gives methodological background and published examples of transparent reporting. The STROBE checklist is best used in conjunction with this article (freely available on the Web sites of PLoS Medicine at <http://www.plosmedicine.org/>, Annals of Internal Medicine at <http://www.annals.org/>, and Epidemiology at <http://www.epidem.com/>). Information on the STROBE Initiative is available at <http://www.strobe-statement.org>.

# BMJ Open

## Preschoolers' parent rated health disparities are strongly associated with measures of adiposity in the Lifeways cohort study children

|                                 |                                                                                                                                                                                                                                                                                                                                   |
|---------------------------------|-----------------------------------------------------------------------------------------------------------------------------------------------------------------------------------------------------------------------------------------------------------------------------------------------------------------------------------|
| Journal:                        | <i>BMJ Open</i>                                                                                                                                                                                                                                                                                                                   |
| Manuscript ID:                  | bmjopen-2014-005328.R1                                                                                                                                                                                                                                                                                                            |
| Article Type:                   | Research                                                                                                                                                                                                                                                                                                                          |
| Date Submitted by the Author:   | 02-Jun-2014                                                                                                                                                                                                                                                                                                                       |
| Complete List of Authors:       | Shrivastava, Aakash; University College Dublin, School of Public Health, Physiotherapy & Population Science<br>Murrin, Celine; University College Dublin, School of Public Health, Physiotherapy & Population Science<br>Kelleher, Cecily; University College Dublin, School of Public Health, Physiotherapy & Population Science |
| <b>Primary Subject Heading</b>: | Epidemiology                                                                                                                                                                                                                                                                                                                      |
| Secondary Subject Heading:      | Epidemiology, Public health, Paediatrics                                                                                                                                                                                                                                                                                          |
| Keywords:                       | Lifecourse, self-rated health, obesity, BMI, waist circumference, preschool children                                                                                                                                                                                                                                              |
|                                 |                                                                                                                                                                                                                                                                                                                                   |

SCHOLARONE™  
Manuscripts

1  
2  
3 **Title: Preschoolers' parent rated health disparities are strongly associated with**  
4 **measures of adiposity in the Lifeways cohort study children**  
5  
6

7 **CORRESPONDING AUTHOR:**

8 Professor Cecily C Kelleher

9 School of Public Health, Physiotherapy and Population Science,

10 Woodview House,

11 University College Dublin

12 Belfield,

13 Dublin 4, Republic of Ireland

14 Tel: +3531 7162045

15 Fax: +3531 7163421

16 cecily.kelleher@ucd.ie  
17  
18  
19  
20  
21  
22  
23

24 **AUTHORS**

25 Aakash Shrivastava<sup>1</sup> PhD

26 Celine Murrin<sup>1</sup> PhD

27 Cecily C Kelleher<sup>1</sup> MD

28 <sup>1</sup>School of Public Health, Physiotherapy and Population Science, University College Dublin,  
29 Woodview House, Belfield, Dublin 4, Republic of Ireland  
30  
31  
32  
33  
34

35 **Running Title: Childhood obesity a persistent predictor of preschoolers' PRH**  
36  
37

38 **KEYWORDS**

39 Lifecourse, self-rated health, obesity, BMI, waist circumference, preschool children  
40  
41  
42

43 **Word count: 3340**  
44  
45  
46  
47  
48  
49  
50  
51  
52  
53  
54  
55  
56  
57  
58  
59  
60



**ABSTRACT (Words: 273)****Objective**

To examine the relationship between lifecourse factors from preschoolers' micro-ecosystem and their parent-reported (mother-reported) health (PRH), following them prospectively from preconception to age 5-years. To investigate if preschoolers' BMI and waist-circumference were associated with preschoolers' PRH when controlled for lifecourse predictors.

**Design**

Lifeways cross-generation cohort study

**Setting**

Ireland

**Participants**

Of 1082 families, 62% mothers responded on a health and lifestyle questionnaire at follow-up. Food frequency, BMI and waist-circumference were measured.

**Main outcome measure**

Mother-reported children's PRH at age-5. Associations with child's individual and familial exposures from preconception to age 5-years examined using logistic regression.

**Results**

In univariate analysis, relatively-positive rating of children's PRH were associated with children's lower intake of fats [OR(95%CI)=2.2(1.1-4.3)], higher intake of fruits/vegetables [OR(95%CI)=2.2(1.1-4.3)]; as well as familial socio-economic characteristics {higher household income [OR(95%CI)=3.0(1.6-5.9)], non-entitlement to means-tested healthcare [OR(95%CI)=2.1(1.0-4.3)], mothers' higher education [OR(95%CI)=1.9(1.0-3.6)]}, psycho-

1  
2  
3 social characteristics {father's participation in study [OR(95%CI)=2.1(1.0-4.3)], mothers'  
4 perceiving better support from partner [OR(95%CI)=2.3(1.2-4.3)], children  
5 [OR(95%CI)=1.9(1.0-3.7)] or relatives [OR(95%CI)=2.2(1.1-4.1)]}, parents' lifestyle  
6 {mothers' lower intake of energy [OR(95%CI)=2.2(1.1-4.3)], fathers' non-smoking status  
7 [OR(95%CI)=2.2(1.1-4.4)]}, and parents' health {mothers' self-rated health relatively-  
8 positive [OR(95%CI)=5.1(2.6-9.9)], fathers' self-rated health relatively-positive  
9 [OR(95%CI)=3.0(1.5-6.0)]}.

10  
11  
12 In multivariable analysis ( $\chi^2=34.2, df=21, N=303, R^2=0.26, p<0.05$ ), one of the two strong  
13 predictors of children's relatively-positive PRH was child not being obese by International  
14 Obesity Task Force classification [OR(95%CI)=5.5(1.4-21.0)], observed also using BMI  
15 ( $\text{kg/m}^2$ ) [OR(95%CI)=0.73(0.58-0.93)] or waist-circumference (cm) [OR(95%CI)=0.89(0.81-  
16 0.98)] as continuous variables. The other significant predictor was mothers' self-rated health  
17 relatively-positive [OR(95%CI)=4.2(1.5-12.2)].

### 32 **Conclusions**

33  
34  
35 Preschoolers' health is adversely associated with obesity and this is independent of lifecourse  
36 social and environmental inequalities. The findings suggest that lifecourse adversities during  
37 the early developmental stage may get embedded and expressed as anthropometric measures  
38 of adiposity, suggesting that public health interventions should begin as early as possible.  
39  
40  
41  
42  
43  
44  
45  
46  
47  
48  
49  
50  
51  
52  
53  
54  
55  
56  
57  
58  
59  
60

### Strengths and limitations of this study

- Nationally representative sample of preschool-age children
- Examines the influence of lifecourse adversities, prospectively measured from preconception to age 5 on children's general health at age 5. The study analyses demographic, anthropometric, lifestyle, food and nutrients intake, psycho-social, socio-economic and health-related exposures from both children's individual as well as parental experiences.
- Demonstrates a significant and independent association between preschoolers' measured BMI as well as waist circumference and their general health status.
- The study is limited by a relatively small sample and use of parent-reported health status.

## MAIN TEXT

### Introduction

The development of children is critical to their adult well-being<sup>[1,2]</sup> and across the lifecourse even subjective estimates may be useful to reflect objectively measured health<sup>[3,4]</sup>. Bronfenbrenner<sup>[5]</sup> emphasised the importance of children's micro-ecosystem in their development. Recently, the World Health Organisation's (WHO) Commission on Social Determinants of Health (CSDH) presented a Total Environment Assessment Model for Early Child Development (TEAM-ECD),<sup>[6]</sup> which again illustrates the importance of individual and family spheres of influence on children's health. The relevance of socio-economic, psycho-social and lifestyle environment in child development and health is widely acknowledged.<sup>[6-8]</sup>

According to the lifecourse hypothesis, risk transmission is characterised by critical periods and accumulation of risk models.<sup>[9]</sup> Life Course Health Development (LCHD) framework<sup>[10]</sup> suggests that health is a consequence of multiple determinants that change in context of time and circumstances as an individual develops; these experiences are programmed into bio-behavioural regulatory systems during certain critical and sensitive periods of individual's lifetime to decide their health trajectory. The lifecourse framework on childhood disadvantage and adult health<sup>[11]</sup> suggests that parental and childhood circumstances from the point of conception influences individual's health in later life, and the individual's childhood health and later life circumstances may further add to this foundation. Based on this, Hertzman and colleagues<sup>[12]</sup> examined self-rated health in adulthood using an integrated lifecourse framework. There are a few other studies also which have examined lifecourse determinants of adult global<sup>[13,14]</sup> or specific health status.<sup>[15]</sup> On the contrary, the literature on the determinants of child global health status is sparse,<sup>[16,17]</sup> particularly for the preschool-age children.<sup>[18]</sup> Even rarer are studies whose examination includes early lifecourse determinants of child global health status.

1  
2  
3 Thus the first objective of our analysis was to prospectively examine the relationship between  
4 demographic, anthropometric, lifestyle, nutritional, psycho-social, socio-economic and  
5 health-related lifecourse exposures taken from the children's individual and family spheres of  
6 influence starting from preconception up to age 5-years and their global health status at  
7 preschool-age.  
8  
9

10  
11  
12 In social epidemiology, the construct of “embodiment” refers to biological expression of  
13 individuals' materio-social world.<sup>[19,20]</sup> Similarly in lifecourse epidemiology, it is  
14 hypothesised that early life experiences get “biologically embedded” during critical or  
15 sensitive periods of child development leading to gradients in health.<sup>[21,22]</sup>  
16  
17  
18  
19  
20  
21  
22

23  
24 The Foresight report identifies a large array of environmental determinants of obesity, a  
25 number of which are again related to early child development.<sup>[23]</sup> This suggests obesity as  
26 pivotal risk factor for subsequent health conditions.<sup>[24]</sup>  
27  
28  
29  
30

31 The negative relationship between obesity and self-rated health is now increasingly reported  
32 in adult populations,<sup>[25,26]</sup> some indicating a temporal relationship<sup>[27,28]</sup> and suggesting that  
33 obesity increases health inequalities over time.<sup>[28]</sup> However, evidence on the relationship  
34 between obesity and health is relatively limited in child population studies and those  
35 available have reported health-related-quality-of-life (HR-QoL)<sup>[29]</sup> instead of a generic  
36 measure such as global self-rated health. Moreover, this association is yet to be established  
37 for preschool-age children. To our knowledge just two population based studies have  
38 examined this association in preschool age-group children<sup>[30,31]</sup> and neither had nutritional  
39 information.  
40  
41  
42  
43  
44  
45  
46  
47  
48  
49  
50

51 In the Longitudinal Study of Australian Children, Wake *et al.*<sup>[30]</sup> did not find a significant  
52 difference in global health status of overweight/obese and normal weight 4-5-year-old  
53 children. Skinner *et al.*,<sup>[31]</sup> using data on 3-5-year-olds from the US National Health and  
54  
55  
56  
57  
58  
59  
60

1  
2  
3 Nutrition Examination Survey, reported a poorer global health status in obese and severely  
4 obese preschoolers. Neither of these studies accounted for a number of possibly relevant  
5 confounders, including parental BMI, parental health and nutritional variables.  
6  
7

8  
9  
10 We thus hypothesised that similar to findings from studies on older age-groups,  
11 anthropometric markers of child obesity in our preschool-age children study would also  
12 demonstrate a negative association with their global health status. The next objective of our  
13 analysis was to examine whether anthropometric markers of child obesity would emerge as  
14 strong predictors of global health status when accounted for other socio-economic, psycho-  
15 social, and lifestyle environmental factors in a multivariable model.  
16  
17  
18  
19  
20  
21  
22

## 23 **Methods**

24  
25  
26 The Lifeways cross generation cohort study comprises three generations of 1082 Irish  
27 families and was established in 2001-03; the recruitment procedure of this nationally  
28 representative cohort has been described previously.<sup>[32-34]</sup> The a priori purpose was to  
29 examine familial and cross-generation influences on early childhood development over the  
30 first five years of children's lives. Briefly, would-be mothers were at random recruited from  
31 the two regional maternity hospitals in the Republic of Ireland to get a representative sample.  
32  
33  
34  
35  
36  
37  
38  
39  
40  
41  
42  
43  
44  
45  
46  
47  
48  
49  
50  
51  
52  
53  
54  
55  
56  
57  
58  
59  
60  
A comparison between the Lifeways mothers and a nationally representative sample of  
women of the same age group from the SLÁN (Survey of Lifestyle, Attitudes and Nutrition)  
surveys of Republic of Ireland<sup>[35]</sup> confirmed that the Lifeways mothers were satisfactorily  
representative of the Irish general women on socio-demographic characteristics.<sup>[33]</sup>

At this early pregnancy stage mothers completed a health and lifestyle status questionnaire  
adapted from a validated instrument developed for Irish national SLÁN surveys.<sup>[35]</sup> Mothers  
reported their pre-pregnancy height (cm) and weight (kg) and their smoking status during  
pregnancy. Mothers' and partners' socio-economic status was recorded. Subsequently at

1  
2  
3 birth, the live infants were added to the cohort along-with maternity and birth related hospital  
4  
5 information.  
6

7  
8 In 2007-08, when these children averaged five years of age, the cohort follow-up recorded a  
9  
10 62% response rate.<sup>[34,36]</sup> Though mothers who responded to the follow-up were more likely to  
11  
12 be of higher socioeconomic status, these mothers did not significantly differ in their baseline  
13  
14 anthropometric characteristics (including BMI) from non-responders.<sup>[34,36]</sup> At this 5-year  
15  
16 follow-up, mothers repeated the health and lifestyle assessment questionnaire, with additional  
17  
18 questions related to her family, including a five-level likert item question “In general, would  
19  
20 you say your / your partner’s / your Lifeways child’s current health is Excellent, Very Good,  
21  
22 Good, Fair or Poor”. Mothers provided information on family’s socio-economic, psycho-  
23  
24 social, and lifestyle status. Mothers reported their habitual dietary intake for the previous year  
25  
26 on a semi-quantitative food frequency (SQFFQ) instrument developed from the EPIC study  
27  
28 (European Prospective Investigation into Cancer and Nutrition) and validated for Irish adult  
29  
30 population.<sup>[37]</sup> Mothers also gave details for the Lifeways child’s habitual diet for the  
31  
32 previous year using a different SQFFQ instrument adapted from the UK National Diet and  
33  
34 Nutrition Survey of 4.5-year-old children.<sup>[38]</sup> The mothers’ and children’s SQFFQ were  
35  
36 validated in the Lifeways study using a 7-day weighed food diary in a sub-sample.<sup>[36]</sup> Food  
37  
38 items were aggregated by defined shelves (food groups) of the Irish food pyramid and  
39  
40 assessment was made for average servings per day of standard food item portions consumed  
41  
42 from the “top” and “fruit and vegetable” food groups (shelves of Irish food pyramid). The  
43  
44 “top” food group comprises of high calorie fat and sugar rich foods. Total energy (kcal) and  
45  
46 total fats (g) intake were computed using conversion values from McCance & Widdowson’s  
47  
48 food composition tables<sup>[39]</sup> with a specially developed FFQ software version 1.0 ©.<sup>[40]</sup>  
49  
50  
51  
52  
53

54  
55 Mothers and children, and if available fathers, were offered at 5-year follow-up an  
56  
57 anthropometric assessment at their home for height (cm), weight (kg) and waist  
58  
59  
60

1  
2  
3 circumference (cm) using a standardised protocol,<sup>[34,36]</sup> with 80-85% mothers and children  
4  
5 participating. Body mass index (BMI) was calculated from weight and height information  
6  
7 (kg/m<sup>2</sup>).  
8

9  
10 Thus variables from discrete stages (pre-pregnancy, early pregnancy, at birth, early infancy  
11  
12 and 5-year follow-up) of child's early development representing lifecourse exposures from  
13  
14 distinct domains (demographic, anthropometric, socio-economic, psycho-social, lifestyle,  
15  
16 nutritional and health) of child's individual and family spheres of influence<sup>[6-8]</sup> were  
17  
18 considered to analyse determinants of child's health status at age-5. The selection of  
19  
20 variables, domains and spheres of influence are based on the CSDH constructed TEAM-  
21  
22 ECD, a model of early child development.<sup>[6-8]</sup> These lifecourse variables have been  
23  
24 summarised as per time frame in **Table 1**. This lifecourse time frame highlights the stages  
25  
26 and transition points relevant from perspective of child's health development.<sup>[10]</sup> Additional  
27  
28 details on these variables are provided in **eTable 1** available in the web only supplement. The  
29  
30 independent variables have been arranged as child-related, family-related, mother-related,  
31  
32 father-related groups for ease of presentation.  
33  
34  
35  
36  
37  
38  
39  
40  
41  
42  
43  
44  
45  
46  
47  
48  
49  
50  
51  
52  
53  
54  
55  
56  
57  
58  
59  
60



Table 1: Independent variables examined from lifecourse of 5-yr-old children

| <b>Lifecourse</b>               | <b>Independent Variables</b>                                                                                                                                                                                                                                                                                                                                                                                                                                                                                                                                                                                                             |
|---------------------------------|------------------------------------------------------------------------------------------------------------------------------------------------------------------------------------------------------------------------------------------------------------------------------------------------------------------------------------------------------------------------------------------------------------------------------------------------------------------------------------------------------------------------------------------------------------------------------------------------------------------------------------------|
| Pre-pregnancy                   | Maternal Pre-pregnancy BMI                                                                                                                                                                                                                                                                                                                                                                                                                                                                                                                                                                                                               |
| Early pregnancy                 | Family stability<br>Maternal smoking in pregnancy, Maternal Education level<br>Paternal Education level                                                                                                                                                                                                                                                                                                                                                                                                                                                                                                                                  |
| Birth                           | Child's Birth-weight, Gestational age, Gender<br>Maternal Parity                                                                                                                                                                                                                                                                                                                                                                                                                                                                                                                                                                         |
| Infancy                         | Child's breastfeeding status                                                                                                                                                                                                                                                                                                                                                                                                                                                                                                                                                                                                             |
| When children averaged 5-yr age | Child's Age, Height, BMI, Waist circumference, Food intake: top and fruits & vegetables food groups, Nutrient intake: energy and fats intake<br>Family household weekly income, Entitlement to means tested healthcare benefits scheme, Family structure (marital status), Support from partner, parents, children & relatives<br>Maternal Age, Height, BMI, Waist circumference, Smoking, Employment status, Food intake: top and fruits & vegetables food groups, Nutrient intake: energy and fats intake, Self-rated health status<br>Paternal Height, BMI, Waist circumference, Smoking, Employment status, Self-rated health status |

Children's global health status rated in proxy by their mothers, hereafter referred to as parent-rated health (PRH), was the outcome variable of interest. The 5-graded scale response was dichotomised as relatively-positive health (excellent or very good) and relatively-negative health (poor or fair or good), based on similar dichotomisation in other studies on preschool and school children.<sup>[17,18,30]</sup> It is reasonable to take a higher cut-off when dichotomising this age dependent variable in this very young age-group as there would be very limited numbers of poor or fair health children.<sup>[17,18,41]</sup>

Initially, uni-variate associations were established between the independent predictors and children's PRH using independent t-tests or chi-square tests. Independent categorical variables were dichotomised in a manner that allowed contrasting extreme levels against the others. Thus, using International Obesity Task Force (IOTF) cut-offs, children's BMI was dichotomised as obese versus over-weight or normal-weight. Similarly nutrition variables ordered in quintiles were dichotomised as the extreme quintile (1<sup>st</sup> or 5<sup>th</sup>) versus the rest.

1  
2  
3 From these independent variables principally chosen on the basis of their relevance to the  
4 child's development,<sup>16-81</sup> all those that qualified at significance level 20% ( $p<0.2$ )<sup>1421</sup> in  
5 univariate analyses were force entered into a multivariable logistic regression model. BMI  
6 ( $\text{kg}/\text{m}^2$ ) and waist circumference (cm), the anthropometric markers of obesity, were tested  
7 separately in independent multivariable models. Initially BMI was tested as a categorical  
8 variable in a model, followed by two additional models substituting it with BMI and then  
9 waist circumference as continuous variables. Other independent variables were tested as  
10 categorical variables.  
11  
12  
13  
14  
15  
16  
17  
18  
19

20  
21 Ethical approval for the Lifeways study was obtained respectively from ethical committees of  
22 participating hospitals and the University College Dublin, Ireland. Written informed consent  
23 was obtained from study participants.  
24  
25  
26  
27

## 28 **Results**

29  
30 There were 547 family datasets available for analysis of children's PRH. **Table 2** presents the  
31 uni-variate associations between children's lifecourse variables and PRH. Within the  
32 individual-sphere of influences, children's lifestyle behaviours (lower intake of fatty/sugary  
33 foods and total fats, and higher intake of fruits/vegetables) and their anthropometric measures  
34 at age-5 (not being obese, lower BMI, and lower waist circumference) qualified as  
35 determinants of children's relatively-positive PRH for further examination in the  
36 multivariable model.  
37  
38  
39  
40  
41  
42  
43  
44  
45

46  
47 In other words, retaining  $p<0.2$  as the criterion for significance, the children's healthy food  
48 and nutrient intake habits – such as decreased intake of unhealthy fat- and sugar- rich foods  
49 (servings/day) [OR(95%CI)=1.7(0.8-3.4)] or total fats (g) in their meals  
50 [OR(95%CI)=2.2(1.1-4.3)] and increased intake of healthy fruits and vegetables  
51 (servings/day) [OR(95%CI)=2.2(1.1-4.3)] were positively associated with their favourable  
52  
53  
54  
55  
56  
57  
58  
59  
60

1  
2  
3 rating for health by their mothers. Conversely, children's increased BMI (kg/m<sup>2</sup>)  
4 [OR(95%CI)=0.85(0.71-1.03)] and waist circumference (cm) [OR(95%CI)=0.95(0.88-1.02)]  
5  
6  
7 were inversely associated with a positive parental-rated health status.  
8  
9

10 Within the family-sphere of influences, socio-economic status (higher household income,  
11 non-entitlement to subsidised healthcare, both parents' higher education status, and father's  
12 employment status), psycho-social status (father's study participation, mother's perceived  
13 social support), mother's lifestyle behaviours (lower intake of fatty/sugary foods, total energy  
14 and total fats), father's lifestyle behaviours (non-smoker), and both parents' health status  
15 (relatively-positive self-rated health) qualified as determinants of children's relatively-  
16 positive PRH for further examination in the multivariable model.  
17  
18  
19  
20  
21  
22  
23  
24

25  
26 In other words, by maintaining  $p < 0.2$  as the criterion for significance, several indicators of a  
27 family's better socio-economic status— such as increased household income (Euros/week)  
28 [OR(95%CI)=3.0(1.6-5.9)], not requiring subsidised healthcare [OR(95%CI)=2.1(1.0-4.3)],  
29 mother having a third level education [OR(95%CI)=1.9(1.0-3.6)], father having a third level  
30 education [OR(95%CI)=1.9(1.0-3.6)], father being self-employed [OR(95%CI)=2.5(0.8-  
31 7.9)]; family's better psycho-social status— such as father's involvement in family affairs  
32 [OR(95%CI)=2.1(1.0-4.3)], mother's perceiving a positive social support from spouse  
33 [OR(95%CI)=2.3(1.2-4.3)], parents [OR(95%CI)=2.0(1.0-4.1)], children  
34 [OR(95%CI)=1.9(1.0-3.7)], or relatives [OR(95%CI)=2.2(1.1-4.1)]; family's better lifestyle  
35 and food and nutrient intake habits— such as mother's decreased intake of unhealthy fat- and  
36 sugar- rich foods (servings/day) [OR(95%CI)=1.7(0.8-3.4)], total energy (kcal)  
37 [OR(95%CI)=2.2(1.1-4.3)] and total fats (g) [OR(95%CI)=1.7(0.8-3.4)] in her meals, father's  
38 not being a smoker [OR(95%CI)=2.2(1.1-4.4)]; and family's better health status— such as  
39 mother [OR(95%CI)=5.1(2.6-9.9)] and father [OR(95%CI)=3.0(1.5-6.0)] having a positively  
40  
41  
42  
43  
44  
45  
46  
47  
48  
49  
50  
51  
52  
53  
54  
55  
56  
57  
58  
59  
60

1  
2  
3  
4  
5  
6  
7  
8  
9  
10  
11  
12  
13  
14  
15  
16  
17  
18  
19  
20  
21  
22  
23  
24  
25  
26  
27  
28  
29  
30  
31  
32  
33  
34  
35  
36  
37  
38  
39  
40  
41  
42  
43  
44  
45  
46  
47  
48  
49  
50  
51  
52  
53  
54  
55  
56  
57  
58  
59  
60

rated health status were positively associated with children’s favourable rating for health by their mothers.

For peer review only

Table 2: Uni-variate lifecourse associates of children's relatively-positive parent-rated health, PRH (N=547)

|                                               | Relatively Negative PRH |                          | Relatively Positive PRH   |      | OR                        | 95% CI |
|-----------------------------------------------|-------------------------|--------------------------|---------------------------|------|---------------------------|--------|
|                                               | N                       | (n=42)<br>%(n) Mean (SD) | (n=505)<br>%(n) Mean (SD) |      |                           |        |
| <b>Child's Individual Characteristics</b>     |                         |                          |                           |      |                           |        |
| Birth-weight adjusted for gestational age (g) | 487                     | (34) 3564.1 (616)        | (453) 3548.4 (552)        | 1.00 | (0.999-1.001)             |        |
| Child's Age (Yrs)                             | 547                     | (42) 5.42 (0.23)         | (505) 5.46 (0.25)         |      |                           |        |
| Gender                                        | 547                     |                          |                           |      |                           |        |
| Male                                          |                         | 8.0% (22)                | 92.0% (242)               | Ref  |                           |        |
| Female                                        |                         | 7.1% (21)                | 92.9% (262)               | 1.14 | (0.60-2.20)               |        |
| BMI (kg/m <sup>2</sup> )                      | 464                     | (35) 17.09 (2.5)         | (429) 16.59 (1.6)         | 0.85 | (0.71-1.03) <sup>^</sup>  |        |
| BMI [IOTF]                                    | 464                     |                          |                           |      |                           |        |
| Obese                                         |                         | 16.7% (5)                | 83.3% (25)                | Ref  |                           |        |
| Overweight / Normal                           |                         | 6.9% (30)                | 93.1% (404)               | 2.69 | (0.96-7.54) <sup>^</sup>  |        |
| Waist Circumference (cm)                      | 462                     | (35) 57.01 (6.8)         | (427) 55.88 (4.3)         | 0.95 | (0.88-1.02) <sup>†</sup>  |        |
| Height (cm)                                   | 464                     | (35) 111.6 (5.6)         | (429) 112.1 (4.8)         | 1.02 | (0.95-1.10)               |        |
| Breastfeeding                                 | 528                     |                          |                           |      |                           |        |
| Not breastfed                                 |                         | 6.5% (16)                | 93.5% (229)               | Ref  |                           |        |
| Breastfed                                     |                         | 8.8% (25)                | 91.2% (258)               | 0.72 | (0.38-1.38)               |        |
| Energy (Kcal)                                 | 547                     |                          |                           |      |                           |        |
| Quintile 5 (>1794 kcal)                       |                         | 10% (11)                 | 90.0% (99)                | Ref  |                           |        |
| Quintile 1-4                                  |                         | 7.1% (31)                | 92.9% (406)               | 1.46 | (0.71-3.00)               |        |
| Fats (g)                                      | 547                     |                          |                           |      |                           |        |
| Quintile 5 (>62.9 g)                          |                         | 12.8% (14)               | 87.2% (95)                | Ref  |                           |        |
| Quintile 1-4                                  |                         | 6.4% (28)                | 93.6% (410)               | 2.16 | (1.09-4.26) <sup>*</sup>  |        |
| Top food group (servings/day)                 | 547                     |                          |                           |      |                           |        |
| Quintile 5 (>6.47 servings)                   |                         | 10.9% (12)               | 89.1% (98)                | Ref  |                           |        |
| Quintile 1-4                                  |                         | 6.9% (30)                | 93.1% (407)               | 1.66 | (0.82-3.36) <sup>†</sup>  |        |
| Fruits Veg food group (servings/d)            | 547                     |                          |                           |      |                           |        |
| Quintile 1 (<2.1 servings)                    |                         | 12.8% (14)               | 87.2% (95)                | Ref  |                           |        |
| Quintile 2-5                                  |                         | 6.4% (28)                | 93.6% (410)               | 2.16 | (1.09-4.26) <sup>*</sup>  |        |
| <b>Family Characteristics</b>                 |                         |                          |                           |      |                           |        |
| Household Weekly Income                       | 509                     |                          |                           |      |                           |        |
| Less than 760 Euros/wk                        |                         | 13.3% (26)               | 86.7% (170)               | Ref  |                           |        |
| More than 760 Euros/wk                        |                         | 4.8% (15)                | 95.2% (298)               | 3.04 | (1.57-5.90) <sup>**</sup> |        |
| Entitlement to General Medical Card           | 532                     |                          |                           |      |                           |        |
| Entitled                                      |                         | 13% (12)                 | 87.0% (80)                | Ref  |                           |        |
| Not entitled                                  |                         | 6.6% (29)                | 93.4% (411)               | 2.13 | (1.04-4.34) <sup>*</sup>  |        |
| Fathers' Participation                        | 547                     |                          |                           |      |                           |        |
| Not                                           |                         | 9.7% (31)                | 90.3% (290)               | Ref  |                           |        |
| Yes                                           |                         | 4.9% (11)                | 95.1% (215)               | 2.09 | (1.03-4.25) <sup>*</sup>  |        |
| Marital Status                                | 542                     |                          |                           |      |                           |        |
| Others                                        |                         | 11.4% (5)                | 88.6% (39)                | Ref  |                           |        |
| Married/Cohabiting                            |                         | 7.2% (36)                | 92.8% (462)               | 1.65 | (0.61-4.43)               |        |
| Elder children in family (Parity)             | 535                     |                          |                           |      |                           |        |
| Nullipara                                     |                         | 8% (18)                  | 92.0% (207)               | Ref  |                           |        |
| Multipara                                     |                         | 7.7% (24)                | 92.3% (286)               | 1.04 | (0.55-1.96)               |        |
| Support from Spouse/Partner                   | 538                     |                          |                           |      |                           |        |
| Lesser support                                |                         | 12.9% (17)               | 87.1% (115)               | Ref  |                           |        |
| More support                                  |                         | 6.2% (25)                | 93.8% (381)               | 2.25 | (1.18-4.32) <sup>*</sup>  |        |
| Support from Parents                          | 487                     |                          |                           |      |                           |        |
| Lesser support                                |                         | 12.5% (12)               | 87.5% (84)                | Ref  |                           |        |
| More support                                  |                         | 6.6% (26)                | 93.4% (365)               | 2.01 | (0.97-4.14) <sup>^</sup>  |        |
| Support from Children                         | 532                     |                          |                           |      |                           |        |
| Lesser support                                |                         | 10.6% (20)               | 89.4% (169)               | Ref  |                           |        |
| More support                                  |                         | 5.8% (20)                | 94.2% (323)               | 1.91 | (1.00-3.65) <sup>*</sup>  |        |
| Support from Close Relatives                  | 510                     |                          |                           |      |                           |        |
| Lesser support                                |                         | 12.4% (19)               | 87.6% (134)               | Ref  |                           |        |
| More support                                  |                         | 6.2% (22)                | 93.8% (335)               | 2.16 | (1.13-4.12) <sup>*</sup>  |        |

Table 2: Uni-variate lifecourse associates of children's relatively-positive parent-rated health, PRH (continued)

|                                            | N   | Relatively Negative PRH<br>(n=42) |             | Relatively Positive PRH<br>(n=505) |             | OR   | 95% CI        |
|--------------------------------------------|-----|-----------------------------------|-------------|------------------------------------|-------------|------|---------------|
|                                            |     | %(n)                              | Mean (SD)   | %(n)                               | Mean (SD)   |      |               |
| <b>Maternal Characteristics</b>            |     |                                   |             |                                    |             |      |               |
| Pre-pregnancy BMI (kg/m <sup>2</sup> )     | 475 | (36)                              | 23.3 (3.3)  | (439)                              | 23.8 (3.9)  | 1.04 | (0.94-1.14)   |
| Pre-pregnancy BMI [WHO cut offs]           |     |                                   |             |                                    |             |      |               |
| Obese                                      |     | 2.6% (1)                          |             | 97.4% (38)                         |             | Ref  |               |
| Overweight / Normal                        |     | 8% (35)                           |             | 92.0% (401)                        |             | 0.30 | (0.04-2.26)   |
| Mother's Age (Yrs)                         | 546 | (42)                              | 36.5 (6.3)  | (504)                              | 37.1 (5.3)  | 1.02 | (0.96-1.08)   |
| BMI at 5-yr follow-up (kg/m <sup>2</sup> ) | 432 |                                   | 25.6 (3.9)  |                                    | 26.3 (5.0)  | 1.03 | (0.95-1.12)   |
| BMI at 5-yr follow-up [WHO cut offs]       | 432 |                                   |             |                                    |             |      |               |
| Obese                                      |     | 7.2% (5)                          |             | 92.8% (64)                         |             | Ref  |               |
| Overweight / Normal                        |     | 7.4% (27)                         |             | 92.6% (336)                        |             | 0.97 | (0.36-2.62)   |
| Waist Circumference (cm)                   | 434 | (31)                              | 85.3 (10.6) | (403)                              | 87.6 (11.9) | 1.02 | (0.99-1.05)   |
| Height (cm)                                | 454 | (33)                              | 161.9 (6.8) | (421)                              | 162.9 (6.0) | 1.03 | (0.97-1.09)   |
| Smoking in pregnancy                       | 534 |                                   |             |                                    |             |      |               |
| Smoker                                     |     | 8.1% (8)                          |             | 91.9% (91)                         |             | Ref  |               |
| Non-Smoker                                 |     | 7.6% (33)                         |             | 92.4% (402)                        |             | 1.07 | (0.48-2.4)    |
| Smoking at 5-yr follow-up                  | 541 |                                   |             |                                    |             |      |               |
| Smoker                                     |     | 7.6% (9)                          |             | 92.4% (110)                        |             | Ref  |               |
| Non-Smoker                                 |     | 7.6% (32)                         |             | 92.4% (390)                        |             | 1.0  | (0.46-2.15)   |
| Energy (Kcal)                              | 546 |                                   |             |                                    |             |      |               |
| Quintile 5 (>2570.9 kcal)                  |     | 13% (14)                          |             | 87.0% (94)                         |             | Ref  |               |
| Quintile 1-4                               |     | 6.4% (28)                         |             | 93.6% (410)                        |             | 2.18 | (1.11-4.30)*  |
| Fats (g)                                   | 546 |                                   |             |                                    |             |      |               |
| Quintile 5 (>106 g)                        |     | 11% (12)                          |             | 89.0% (97)                         |             | Ref  |               |
| Quintile 1-4                               |     | 6.9% (30)                         |             | 93.1% (407)                        |             | 1.68 | (0.83-3.40)†  |
| Top food group (servings/day)              | 545 |                                   |             |                                    |             |      |               |
| Quintile 5 (>8.35 servings)                |     | 11% (12)                          |             | 89.0% (97)                         |             | Ref  |               |
| Quintile 1-4                               |     | 6.9% (30)                         |             | 93.1% (406)                        |             | 1.67 | (0.83-3.39)†  |
| Fruits Veg food group (servings/day)       | 546 |                                   |             |                                    |             |      |               |
| Quintile 1 (<4.5 servings)                 |     | 9.1% (10)                         |             | 90.9% (100)                        |             | Ref  |               |
| Quintile 2-5                               |     | 7.3% (32)                         |             | 92.7% (404)                        |             | 1.26 | (0.60-2.65)   |
| Education level                            | 534 |                                   |             |                                    |             |      |               |
| Lower                                      |     | 10.4% (25)                        |             | 89.6% (215)                        |             | Ref  |               |
| Third Level                                |     | 5.8% (17)                         |             | 94.2% (277)                        |             | 1.90 | (1.00-3.60)*  |
| Employment                                 | 545 |                                   |             |                                    |             |      |               |
| Not Earning                                |     | 6.4% (15)                         |             | 93.6% (221)                        |             | Ref  |               |
| Employed                                   |     | 9% (22)                           |             | 91.0% (222)                        |             | 0.69 | (0.35-1.36)   |
| Self employed                              |     | 7.7% (5)                          |             | 92.3% (60)                         |             | 0.81 | (0.29-2.33)   |
| Self reported health                       | 546 |                                   |             |                                    |             |      |               |
| Relatively Negative                        |     | 17.1% (27)                        |             | 82.9% (131)                        |             | Ref  |               |
| Relatively Positive                        |     | 3.9% (15)                         |             | 96.1% (373)                        |             | 5.10 | (2.64-9.93)** |
| <b>Paternal Characteristics</b>            |     |                                   |             |                                    |             |      |               |
| BMI at 5-yr follow-up (kg/m <sup>2</sup> ) | 66  | (4)                               |             | (62)                               |             | 0.97 | (0.76-1.23)   |
| Waist Circumference (cm)                   | 65  | (3)                               |             | (62)                               |             | 1.01 | (0.90-1.13)   |
| Height (cm)                                | 66  | (4)                               |             | (62)                               |             | 1.01 | (0.88-1.15)   |
| Smoking at 5-yr follow-up                  | 521 |                                   |             |                                    |             |      |               |
| Smoker                                     |     | 11.5% (16)                        |             | 88.5% (123)                        |             | Ref  |               |
| Non-Smoker                                 |     | 5.5% (21)                         |             | 94.5% (361)                        |             | 2.24 | (1.13-4.42)*  |
| Education level                            | 514 |                                   |             |                                    |             |      |               |
| Lower                                      |     | 11.1% (16)                        |             | 88.9% (128)                        |             | Ref  |               |
| Third Level                                |     | 6.2% (23)                         |             | 93.8% (347)                        |             | 1.89 | (0.97-3.68)^  |
| Employment                                 | 518 |                                   |             |                                    |             |      |               |
| Not Earning                                |     | 9.2% (8)                          |             | 90.8% (79)                         |             | Ref  |               |
| Employed                                   |     | 7.9% (24)                         |             | 92.1% (279)                        |             | 1.18 | (0.51-2.72)   |
| Self employed                              |     | 3.9% (5)                          |             | 96.1% (123)                        |             | 2.49 | (0.79-7.89)†  |
| Self reported health                       | 510 |                                   |             |                                    |             |      |               |
| Relatively Negative                        |     | 12.6% (20)                        |             | 87.4% (139)                        |             | Ref  |               |
| Relatively Positive                        |     | 4.6% (16)                         |             | 95.4% (335)                        |             | 3.01 | (1.52-5.99)** |

\*\*p&lt;0.01, \*p&lt;0.05, ^p&lt;0.1, †p&lt;0.2; Ref=reference category (OR=1)

1  
2  
3 **Table 3** presents the multivariable model for association between qualifying lifecourse  
4 variables and children's relatively-positive PRH at age-5. A significantly strong predictor of  
5 children's relatively-positive PRH was child's not being obese by IOTF classification  
6 [OR(95%CI)=5.5(1.4-21.0)]. When BMI was tested as a continuous variable, there was 0.73  
7 (95%CI=0.58-0.93) times decreased odds of the child being positively rated on health status  
8 for every 1 kg/m<sup>2</sup> increase in their BMI. Similarly in the waist circumference model, for  
9 every 1 cm increase there was 0.89 (95%CI=0.81-0.98) times decreased odds of the child  
10 getting a relatively-positive rating on health status. Thus the association between children's  
11 BMI or waist circumference and their PRH only strengthened following adjustments in this  
12 multivariate model, irrespective of being analysed as a categorical or continuous variable.  
13 Another significant predictor of children's relatively-positive PRH was mother's having rated  
14 her own health as relatively-positive. These predictors maintained the highest strength of  
15 association with children's health status when independent variables were standardised (not  
16 reported here). None of the other variables reached the level of statistical significance. The  
17 models explained over 25 percent of variance for children's PRH.  
18  
19  
20  
21  
22  
23  
24  
25  
26  
27  
28  
29  
30  
31  
32  
33  
34  
35  
36  
37  
38  
39  
40  
41  
42  
43  
44  
45  
46  
47  
48  
49  
50  
51  
52  
53  
54  
55  
56  
57  
58  
59  
60

Table 3: Multivariable Logistic Regression model for predictors of children’s relatively-positive parent-rated health, PRH (N=303)

|                                                                        | Relatively Positive PRH      |                 | Relatively Positive PRH     |                 | Relatively Positive PRH    |                 |
|------------------------------------------------------------------------|------------------------------|-----------------|-----------------------------|-----------------|----------------------------|-----------------|
|                                                                        | BMI Categorical <sup>1</sup> |                 | BMI Continuous <sup>2</sup> |                 | WC Continuous <sup>3</sup> |                 |
|                                                                        | OR                           | 95% CI          | OR                          | 95% CI          | OR                         | 95% CI          |
| <b>Child's Individual Characteristics</b>                              |                              |                 |                             |                 |                            |                 |
| BMI [IOTF], Obese <sup>+</sup> vs Overweight / Normal                  | 5.48                         | (1.43-21.03) *  |                             |                 |                            |                 |
| BMI kg/m <sup>2</sup> [Continuous]                                     |                              |                 | 0.73                        | (0.58-0.93) **  |                            |                 |
| Waist Circumference cm [Continuous]                                    |                              |                 |                             |                 | 0.89                       | (0.81-0.98) *   |
| Fats gm [Quintiles], Q5 <sup>+</sup> vs Q1-4                           | 1.57                         | (0.42-5.79)     | 1.49                        | (0.40-5.53)     | 1.32                       | (0.36-4.80)     |
| Top food group servings/d [Quintiles], Q5 <sup>+</sup> vs Q1-4         | 1.23                         | (0.33-4.53)     | 1.30                        | (0.36-4.63)     | 1.29                       | (0.36-4.62)     |
| Fruits Veg food group servings/d [Quintiles], Q1 <sup>+</sup> vs Q2-5  | 2.57                         | (0.75-8.80)     | 2.86                        | (0.83-9.93)     | 2.73                       | (0.78-9.49)     |
| <b>Family Characteristics</b>                                          |                              |                 |                             |                 |                            |                 |
| Household Weekly Income, Less <sup>+</sup> vs High                     | 1.85                         | (0.63-5.40)     | 1.76                        | (0.59-5.21)     | 1.79                       | (0.61-5.26)     |
| Entitlement to General Medical, Card Yes <sup>+</sup> vs No            | 0.94                         | (0.24-3.71)     | 1.03                        | (0.26-4.07)     | 1.04                       | (0.26-4.10)     |
| Fathers' Participation, Not <sup>+</sup> vs Yes                        | 1.88                         | (0.68-5.21)     | 1.86                        | (0.67-5.16)     | 2.06                       | (0.74-5.71)     |
| Support from Spouse/Partner, Less <sup>+</sup> vs More                 | 0.70                         | (0.20-2.49)     | 0.67                        | (0.19-2.33)     | 0.74                       | (0.22-2.52)     |
| Support from Parents, Less <sup>+</sup> vs More                        | 1.92                         | (0.53-6.93)     | 2.33                        | (0.64-8.42)     | 2.37                       | (0.66-8.53)     |
| Support from Children, Less <sup>+</sup> vs More                       | 1.15                         | (0.38-3.45)     | 1.29                        | (0.42-3.91)     | 1.25                       | (0.41-3.82)     |
| Support from Close Relatives, Less <sup>+</sup> vs More                | 0.86                         | (0.23-3.13)     | 0.84                        | (0.24-3.02)     | 0.84                       | (0.23-3.01)     |
| <b>Maternal Characteristics</b>                                        |                              |                 |                             |                 |                            |                 |
| Energy Kcal [Quintiles], Q5 <sup>+</sup> vs Q1-4                       | 1.89                         | (0.30-11.84)    | 2.00                        | (0.31-12.86)    | 1.57                       | (0.28-8.84)     |
| Fats gm [Quintiles], Q5 <sup>+</sup> vs Q1-4                           | 0.72                         | (0.09-5.54)     | 0.59                        | (0.07-4.77)     | 0.92                       | (0.13-6.41)     |
| Top food group servings/d [Quintiles], Q5 <sup>+</sup> vs Q1-4         | 1.08                         | (0.29-3.94)     | 1.30                        | (0.36-4.65)     | 1.18                       | (0.32-4.34)     |
| Education, Lower <sup>+</sup> vs Third level                           | 1.34                         | (0.47-3.78)     | 1.35                        | (0.48-3.80)     | 1.48                       | (0.53-4.13)     |
| Self reported health status, Rel.Negative <sup>+</sup> vs Rel.Positive | 4.20                         | (1.45-12.20) ** | 4.42                        | (1.53-12.79) ** | 4.17                       | (1.47-11.87) ** |
| <b>Paternal Characteristics</b>                                        |                              |                 |                             |                 |                            |                 |
| Current Smoking status, Yes <sup>+</sup> vs No                         | 1.37                         | (0.48-3.93)     | 1.31                        | (0.45-3.83)     | 1.53                       | (0.54-4.35)     |
| Education, Lower <sup>+</sup> vs Third level                           | 0.69                         | (0.21-2.28)     | 0.79                        | (0.24-2.57)     | 0.83                       | (0.26-2.67)     |
| Employment, Non-earning <sup>+</sup> vs Self employed                  | 1.60                         | (0.73-3.53)     | 1.52                        | (0.69-3.32)     | 1.57                       | (0.70-3.53)     |
| Self reported health status, Rel.Negative <sup>+</sup> vs Rel.Positive | 1.48                         | (0.52-4.20)     | 1.54                        | (0.54-4.35)     | 1.43                       | (0.51-3.96)     |

OR=Odds Ratio; <sup>+</sup>Reference category (OR=1); \*\*p<0.01 (2-tailed), \*p<0.05 (2-tailed)

Rel.Negative=Relatively Negative, Rel.Positive=Relatively Positive

<sup>1</sup>Child BMI as a categorical variable; Model Chi-sq = 34.2, df = 21, p = 0.034; -2LL = 128.6, Nagelkerke R-sq = 0.26

<sup>2</sup>Child BMI as a continuous variable; Model Chi-sq = 35.9, df = 21, p = 0.022; -2LL = 126.9, Nagelkerke R-sq = 0.27

<sup>3</sup>Child waist circumference as a continuous variable; Model Chi-sq = 33.8, df = 21, p = 0.038; -2LL = 128.9, Nagelkerke R-sq = 0.25



## Discussion

This analysis showed that determinants from both child's individual and family spheres have an influence on child's health at preschool-age. The factors from all three material, psycho-social and lifestyle domains, the major explanations for child health inequalities,<sup>[8]</sup> were associated at uni-variate levels. However, in the final model this analysis clearly demonstrated a negative association between child's obesity and health status. Child's not being obese was one of the significantly strong predictors of child's relatively-positive health status, which was also observed with measured BMI and waist circumference analysed as continuous variables.

This negative relationship observed between measured obesity and PRH conforms to published literature on primary school age-group children and adolescents.<sup>[43-45]</sup> Most importantly, for the first time to our knowledge, this analysis demonstrates the association having adjusted for food and nutrient intake, along-with a wide range of other explanatory variables.

Self-rated health is an important and valid measure of morbidity, mortality, longevity and health status,<sup>[3,4]</sup> also in Irish adult<sup>[46,47]</sup> and children.<sup>[16]</sup> It is believed to be a more inclusive measure of health than the objective measurements, with a capacity to comprehensively evaluate health dynamics, behaviours and psycho-physiological states that are not otherwise easy to measure.<sup>[3]</sup>

This holistic measure better accommodates the WHO defined concept of health as opposed to a diagnosed specific disease.<sup>[3]</sup> Use of parent proxy for child self-reported health is justified for children too young to have adequate cognitive skills.<sup>[48,49]</sup> Systematic reviews report good agreement between ratings by children and their parents on child HRQoL, particularly for physical health domain.<sup>[48-50]</sup> Parents tend to be thoughtful when responding to proxy questions and report children's usual health disposition.<sup>[51]</sup> Studies on construct validity report positively.<sup>[52-55]</sup> Maternal ratings of child's general health status were found sensitive when validated against children's illnesses and other morbidity or healthcare indicators,<sup>[41,56-58]</sup> including evidence of a gradient in strength of these associations.<sup>[41]</sup> Many national-level studies have accepted parent proxy as an

1  
2  
3 appropriate measure<sup>[17,18,59,60]</sup> and successfully used it to longitudinally demonstrate risk and  
4  
5 consequences of child health.<sup>[17,59]</sup>  
6

7  
8 Self-rated health, a composite measure, represents all domains of HR-QoL,<sup>[4]</sup> but better represents  
9  
10 physical health than HR-QoL.<sup>[61]</sup> Studies on older age-group children have reported stronger/sole  
11  
12 negative associations for general/physical health domain of HR-QoL and obesity,<sup>[44,62]</sup> irrespective  
13  
14 whether children themselves or parents reported their HRQoL,<sup>[29]</sup> and also whether BMI was  
15  
16 analysed as a categorical,<sup>[43,44]</sup> or continuous variable.<sup>[63,64]</sup>  
17

18  
19 Another relevance of this analysis is in demonstrating this association of obesity with general-  
20  
21 health in a nationally representative sample of preschool-age children, for which literature is scant.  
22  
23 Though, a few have shown similar association of obesity with specific paediatric conditions or  
24  
25 admission history in this age-group.<sup>[30,31,65-68]</sup> A longitudinal study speculated that pre-school  
26  
27 obesity influences a decline in early-age health, and then both obesity and poor-health tracks into  
28  
29 adolescence.<sup>[69]</sup> The WHO recommends high priority for determinants of health inequalities during  
30  
31 early development.<sup>[70]</sup>  
32  
33

34  
35 The Lifeways previously demonstrated longitudinal association between parental socio-economic  
36  
37 and lifestyle characteristics and child's BMI and waist circumference.<sup>[36]</sup> In this analysis when  
38  
39 same anthropometric measures are included along-with material, psycho-social, and lifestyle  
40  
41 determinants of child obesity and health, a prominent relationship emerges between children's  
42  
43 anthropometric measures and health status. One possible explanation is that determinants of health  
44  
45 inequalities biologically embed<sup>[21,22]</sup> in early life and child obesity is an early phenotypic  
46  
47 expression of this inequality; though the continued influence of environmental factors is not  
48  
49 undermined. Adult<sup>[25,26]</sup> and adolescence studies<sup>[44,45]</sup> have also shown this association to be  
50  
51 independent of socio-demographic, lifestyle or health-related factors.  
52  
53  
54

55  
56 The observed association between BMI or waist circumference and PRH in the present analysis  
57  
58  
59  
60

1  
2  
3 may be temporal, as demonstrated in adults.<sup>[27,28]</sup> Though a number of large scale cross sectional  
4  
5 studies have shown an association between anthropometric measures of obesity and self rated  
6  
7 health,<sup>[71]</sup> only recently a few nationally representative prospective studies have established the  
8  
9 temporality of this association in adults.<sup>[27,28]</sup> Though this relationship maybe bi-directional to an  
10  
11 extent,<sup>[72,73]</sup> the mounting evidence from longitudinal birth cohort studies regarding a sequential  
12  
13 relationship between lifetime growth trajectories and adult disease, disability and deaths<sup>[2]</sup>  
14  
15 primarily rules out reverse causality in this association and suggests that the association observed  
16  
17 in our birth cohort is also more likely to be temporal. Moreover, the available findings from a few  
18  
19 longitudinal studies on primary school age children suggest that at least in the childhood this  
20  
21 inverse association found between BMI and HRQoL is predominantly in the given direction and  
22  
23 not the reverse.<sup>[74,75]</sup> However, this needs careful interpretation as both anthropometric and health  
24  
25 data were concurrently collected, and this limitation may be addressed with next sweep of cohort  
26  
27 data collection.  
28  
29  
30

31  
32 This analysis demonstrated that maternal health was strongly predictive of her child's health. One  
33  
34 concern is that mother's perception of her own health may bias her perception of her child's  
35  
36 health. However, this intergenerational association has been previously reported,<sup>[41,56,57,76-79]</sup> and  
37  
38 reporting mothers can effectively discriminate between their own and children's  
39  
40 health.<sup>[41,56,57,77,78,80]</sup> Several mechanisms such as inherited susceptibility, uterine environment and  
41  
42 shared environment have been suggested for this familial aggregation pattern.<sup>[56,77,78]</sup>  
43  
44  
45

46  
47 Maternal BMI may be related to both maternal self-rated health and child's BMI, so the observed  
48  
49 associations in this analysis could possibly be a reflection of an association between maternal BMI  
50  
51 and child's PRH. However, this was not observed in our analysis. Maternal BMI at both pre-  
52  
53 pregnancy and 5-year follow-up were not associated with child's PRH at univariate level. Also,  
54  
55 when maternal BMI was forcibly added into the multivariable model (not reported here), the  
56  
57 observed associations did not attenuate.  
58  
59  
60

1  
2  
3 The study has limitations in use of reported rather than measured health status and a relatively  
4 small sample size. Though the study was able to detect the major explanatory domains for child  
5 health inequalities documented in the literature<sup>[8]</sup>, the relatively small sample size of this study  
6 may possibly have underpowered it to detect variables with lesser effect sizes. The complete case  
7 approach to analysis reduced the sample size of the final multivariate model. However, this  
8 missing data was not systematic but rather on account of accumulation of missing completely at  
9 random data across a number of variables. It may be argued that the reduced sample size possibly  
10 influenced the odds ratio estimate for the association between children's relatively-positive PRH  
11 and the child's not being obese (using a categorical IOTF classification). Nonetheless this  
12 association between children's anthropometric measures and their parent-rated health variable is  
13 likely to be coherent, because these associations remain statistically significant even when BMI  
14 and WC are analysed as continuous variables.  
15  
16  
17  
18  
19  
20  
21  
22  
23  
24  
25  
26  
27  
28  
29

30 As in most birth cohort studies,<sup>[81,82]</sup> the Lifeways birth cohort also experienced the attrition of  
31 mothers belonging to lower socio-economic status in the early stages of the study. Though this  
32 may underestimate some socioeconomic inequalities<sup>[83]</sup>, it does not negate the exposure-outcome  
33 associations detected through regression models of such longitudinal studies<sup>[84,85]</sup>.  
34  
35  
36  
37  
38  
39

40 Nevertheless, this study has advantages in use of lifecourse variables from pre-conception to age  
41 of 5-years, with measured BMI and waist circumference data. It also has detailed foods and  
42 nutrient data along-with other socio-economic, psycho-social and lifestyle variables for child and  
43 both parents.  
44  
45  
46  
47  
48

49 In conclusion, these analyses from the Lifeways cohort show that lifecourse adversities were  
50 associated with mother-reported health for preschoolers, suggesting an early life influence.  
51 Preschoolers' BMI and waist-circumference demonstrated strong negative associations with  
52 mother-reported health independent of socio-economic, psycho-social, and lifestyle factors,  
53 suggesting early biological expression of lifecourse adversities. The findings have important  
54  
55  
56  
57  
58  
59  
60

1  
2  
3 implications in understanding how early life environment may create inequalities in developmental  
4  
5 health.  
6  
7  
8  
9  
10  
11  
12  
13  
14  
15  
16  
17  
18  
19  
20  
21  
22  
23  
24  
25  
26  
27  
28  
29  
30  
31  
32  
33  
34  
35  
36  
37  
38  
39  
40  
41  
42  
43  
44  
45  
46  
47  
48  
49  
50  
51  
52  
53  
54  
55  
56  
57  
58  
59  
60

For peer review only

**Footnotes****Acknowledgements**

The Lifeways Cross-Generation Cohort Study is overseen by an interdisciplinary scientific steering group chaired by CCK, the principal investigator. The authors greatly appreciate the participation of the Lifeways cohort families.

**Contributors**

AS undertook all analyses reported in this manuscript, interpreted the findings and drafted the manuscript. CM contributed to data collection at five year follow-up, interpretation of the analysis and critical revision of the manuscript. CCK designed the study, supervised the analyses, interpretation of results and intellectual content of the manuscript. All three authors approved the final version.

**Funding**

The Lifeways Cross-Generation Cohort Study was established as part of European Science Foundation funded 'Social Variations in Health Expectancy in Europe' international research programme and its various sweeps have been funded by the Health Research Board of Ireland. Funding sources had no involvement in design, collection, analysis, interpretation, writing and submission of this manuscript.

**Competing interests**

None

### **Ethical approvals**

Ethics committees of Coombe University Hospital, Dublin, University College Hospital Galway, University College Dublin, Dublin, and the Irish College of General Practitioners, Ireland.

### **Data sharing statement**

There are no additional data available. The data manager may be contacted at john.obrien@ucd.ie for more details on the Lifeways Cross-Generation Cohort Study.

### **Appendices**

The web only supplement includes eTable 1 regarding details of examined variables and eTable 2 displaying standardised odds ratios for multivariable logistic regression model.

## REFERENCES

1. Barker DJ. Sir Richard Doll Lecture. Developmental origins of chronic disease. *Public Health* 2012;**126**(3):185-9.
2. Power C1, Kuh D, Morton S. From developmental origins of adult disease to life course research on adult disease and aging: insights from birth cohort studies. *Annu Rev Public Health*. 2013;**34**:7-28.
3. Benyamini Y. Self-ratings of health and longevity: a health psychologist's viewpoint on epidemiological findings. *The European Health Psychologist* 2008;**10**:10–13.
4. Bjorner J, Fayers P, Idler E. Self-rated health. In: Fayers PM, Hays RD, eds. *Assessing quality of life in clinical trials: methods and practice*. 2nd edn. New York: Oxford University Press, 2005:309-24.
5. Bronfenbrenner U. Ecological models of human development. In: Postlethwaite TN, Husen T, eds. *International Encyclopedia of Education*. Vol 3. 2nd ed. Oxford, England: Elsevier Sciences, Ltd., 1994: 1643-47.
6. Siddiqi A, Irwin LG, Hertzman C. Total environment assessment model for early child development. Evidence report for the WHO commission on social determinants of health. World Health Organization, 2007.  
[http://www.who.int/social\\_determinants/resources/ecd\\_kn\\_evidence\\_report\\_2007.pdf](http://www.who.int/social_determinants/resources/ecd_kn_evidence_report_2007.pdf)  
(accessed March 30, 2012).



- 1  
2  
3 7. Maggi S, Irwin LJ, Siddiqi A, *et al.* The social determinants of early child development: an  
4  
5 overview. *J Paediatr Child Health* 2010;**46**(11):627-35.  
6  
7
- 8  
9  
10 8. Hertzman C, Li J, Mattes E, *et al.* Social determinants of child health and well-being  
11  
12 [Editorial]. *Health Sociology Review* 2009;**18**(1):3-11.  
13
- 14  
15  
16 9. Ben-Shlomo Y, Kuh D. A life course approach to chronic disease epidemiology:  
17  
18 conceptual models, empirical challenges and interdisciplinary perspectives. *Int J Epidemiol*  
19  
20 2002;**31**(2):285-93.  
21  
22
- 23  
24  
25 10. Halfon N, Hochstein M. Life course health development: an integrated framework for  
26  
27 developing health, policy, and research. *Milbank Q* 2002; **80**(3):433-79, iii.  
28  
29
- 30  
31  
32 11. Graham H, and Power Chris. *Childhood disadvantage and adult health: a lifecourse*  
33  
34 *framework*. London: NHS Health Development Agency, 2004.  
35  
36 [http://www.gserve.nice.org.uk/niceMedia/pdf/childhood\\_disadvantage\\_health.pdf](http://www.gserve.nice.org.uk/niceMedia/pdf/childhood_disadvantage_health.pdf)  
37  
38 (accessed May 24, 2014).  
39  
40
- 41  
42  
43 12. Hertzman C, Power C, Matthews S, *et al.* Using an interactive framework of society and  
44  
45 lifecourse to explain self-rated health in early adulthood. *Soc Sci Med* 2001;**53**(12):1575-  
46  
47 85.  
48  
49
- 50  
51  
52 13. Mensah FK, Hobcraft J. Childhood deprivation, health and development: associations with  
53  
54 adult health in the 1958 and 1970 British prospective birth cohort studies. *J Epidemiol*  
55  
56 *Community Health* 2008;**62**(7):599-606.  
57  
58  
59  
60

- 1  
2  
3  
4  
5 14. Kestila L, Koskinen S, Martelin T, *et al*. Determinants of health in early adulthood: what is  
6 the role of parental education, childhood adversities and own education ? *Eur J Public*  
7 *Health* 2006;**16**(3):305-14.  
8  
9  
10  
11  
12  
13  
14 15. Pollitt R, Rose K, Kaufman J. Evaluating the evidence for models of life course  
15 socioeconomic factors and cardiovascular outcomes: a systematic review. *BMC Public*  
16 *Health* 2005;**5**(1):7.  
17  
18  
19  
20  
21  
22  
23 16. Kelleher CC, Tay J, Gabhainn SN. Influence on self-rated health of socio-demographic,  
24 lifestyle and affluence factors: an analysis of the Irish and international health behaviours  
25 among school-aged children (HBSC) datasets 1998. *Ir Med J* 2007;**100**(8):suppl 43-6.  
26  
27  
28  
29  
30  
31  
32 17. Stein RE, Siegel MJ, Bauman LJ. Double jeopardy: what social risk adds to biomedical  
33 risk in understanding child health and health care utilization. *Acad Pediatr* 2010;**10**(3):165-  
34 71.  
35  
36  
37  
38  
39  
40  
41 18. Stevens GD. Gradients in the health status and developmental risks of young children: the  
42 combined influences of multiple social risk factors. *Matern Child Health J* 2006;**10**(2):187-  
43 99.  
44  
45  
46  
47  
48  
49  
50 19. Krieger N. Theories for social epidemiology in the 21st century: an ecosocial perspective.  
51 *Int J Epidemiol* 2001;**30**(4):668-77.  
52  
53  
54  
55  
56  
57  
58  
59  
60

- 1  
2  
3  
4  
5  
6  
7  
8  
9  
10  
11  
12  
13  
14  
15  
16  
17  
18  
19  
20  
21  
22  
23  
24  
25  
26  
27  
28  
29  
30  
31  
32  
33  
34  
35  
36  
37  
38  
39  
40  
41  
42  
43  
44  
45  
46  
47  
48  
49  
50  
51  
52  
53  
54  
55  
56  
57  
58  
59  
60
20. Krieger N. A glossary for social epidemiology. *J Epidemiol Community Health* 2001;**55**(10):693-700.
21. Hertzman C. The biological embedding of early experience and its effects on health in adulthood. *Ann N Y Acad Sci* 1999;**896**(1):85-95.
22. Hertzman C, Boyce T. How experience gets under the skin to create gradients in developmental health. *Annu Rev Public Health* 2010;**31**:329-47 C1-C3.
23. Butland B, Jebb S, Kopelman P, *et al.* Foresight. Tackling obesities: future choices — Project report. London: Government Office for Science, 2007.  
<http://www.bis.gov.uk/assets/foresight/docs/obesity/17.pdf> (accessed March 30, 2012).
24. Aboderin I, Kalache A, Ben-Shlomo Y, *et al.* Life course perspectives on coronary heart disease, stroke and diabetes: key issues and implications for policy and research. Geneva: World Health Organization, 2002.  
[http://whqlibdoc.who.int/hq/2002/WHO\\_NMH\\_NPH\\_02.1.pdf](http://whqlibdoc.who.int/hq/2002/WHO_NMH_NPH_02.1.pdf) (accessed March 30, 2012).
25. Molarius A, Berglund K, Eriksson C, *et al.* Socioeconomic conditions, lifestyle factors, and self-rated health among men and women in Sweden. *Eur J Public Health* 2007;**17**(2):125-33.
26. Prosper M-H, Moczulski VL, Qureshi A. Obesity as a predictor of self-rated health. *Am J Health Behav* 2009;**33**(3):319-29.

- 1  
2  
3 27. Svedberg P, Bardage C, Sandin S, *et al.* A prospective study of health, life-style and  
4 psychosocial predictors of self-rated health. *Eur J Epidemiol* 2006;**21**(10):767-76.  
5  
6  
7  
8  
9  
10 28. Zajacova A, Burgard SA. Body weight and health from early to mid-adulthood: a  
11 longitudinal analysis. *J Health Soc Behav* 2010;**51**(1):92-107.  
12  
13  
14  
15  
16 29. Tsiros MD, Olds T, Buckley JD, *et al.* Health-related quality of life in obese children and  
17 adolescents. *Int J Obes (Lond)* 2009;**33**(4):387-400.  
18  
19  
20  
21  
22  
23 30. Wake M, Hardy P, Sawyer MG, *et al.* Comorbidities of overweight/obesity in Australian  
24 preschoolers: a cross-sectional population study. *Arch Dis Child* 2008;**93**(6):502-07.  
25  
26  
27  
28  
29  
30 31. Skinner AC, Perrin EM, Steiner MJ. Healthy for now? A cross-sectional study of the  
31 comorbidities in obese preschool children in the United States. *Clin Pediatr (Phila)*  
32 2010;**49**(7):648-55.  
33  
34  
35  
36  
37  
38 32. O'Mahony D, Fallon UB, Hannon F, *et al.* The Lifeways Cross-Generation Study: design,  
39 recruitment and data management considerations. *Ir Med J* 2007;**100**(8):suppl 3-6.  
40  
41  
42  
43  
44  
45 33. Niedhammer I, O'Mahony D, Daly S, *et al.* Occupational predictors of pregnancy outcomes  
46 in Irish working women in the Lifeways cohort. *BJOG* 2009;**116**(7):943-52.  
47  
48  
49  
50  
51  
52 34. Murrin CM, Kelly GE, Tremblay RE, *et al.* Body mass index and height over three  
53 generations: evidence from the Lifeways Cross-Generational Cohort Study. *BMC Public*  
54 *Health* 2012;**12**:81.  
55  
56  
57  
58  
59  
60

- 1  
2  
3  
4  
5  
6  
7  
8  
9  
10  
11  
12  
13  
14  
15  
16  
17  
18  
19  
20  
21  
22  
23  
24  
25  
26  
27  
28  
29  
30  
31  
32  
33  
34  
35  
36  
37  
38  
39  
40  
41  
42  
43  
44  
45  
46  
47  
48  
49  
50  
51  
52  
53  
54  
55  
56  
57  
58  
59  
60
35. National Nutrition Surveillance Centre. Dietary habits of the Irish population: results from SLÁN, Annual Report 2003. Dublin: National Nutritional Surveillance Centre, Department of Public Health Medicine and Epidemiology, University College Dublin, Dublin and Health Promotion Unit, Department of Health and Children, Dublin, 2003.
  36. Murrin C. Maternal factors during pregnancy contributing to early life risk of childhood obesity [PhD Thesis]. Dublin: University College Dublin, 2011.
  37. Harrington J. Validation of a food frequency questionnaire as a tool for assessing nutrient intake [MA Thesis]. Galway: National University of Ireland, 1997.
  38. Gregory J, Collins D, Davies P, *et al.* National Diet and Nutrition Survey: children aged 1.5 - 4.5 years. Volume 1: Report of the diet and nutrition survey. London: HMSO, 1995.
  39. Food Standards Agency. McCance and Widdowson's The composition of foods, sixth summary edition. Cambridge: Royal Society of Chemistry, 2002.
  40. FFQ\_Software version 1.0. Dublin: National Nutrition Surveillance Centre, School of Public Health and Population Science, University College Dublin, 2007.
  41. Monette S, Séguin L, Gauvin L, *et al.* Validation of a measure of maternal perception of the child's health status. *Child Care Health Dev* 2007;**33**(4):472-81.

- 1  
2  
3 42. Katz MH. *Multivariable analysis: a practical guide for clinicians and public health*  
4 *researchers*. 3rd ed. New York: Cambridge University Press, 2011.  
5  
6  
7  
8  
9  
10 43. Wake M, Salmon L, Waters E, *et al*. Parent-reported health status of overweight and obese  
11 Australian primary school children: a cross-sectional population survey. *Int J Obes Relat*  
12 *Metab Disord* 2002;**26**(5): 717-24.  
13  
14  
15  
16  
17  
18 44. Swallen KC, Reither EN, Haas SA, *et al*. Overweight, obesity, and health-related quality of  
19 life among adolescents: the National Longitudinal Study of Adolescent Health. *Pediatrics*  
20 2005;**115**(2):340-47.  
21  
22  
23  
24  
25  
26  
27 45. Vingilis ER, Wade TJ, Seeley JS. Predictors of adolescent self-rated health. Analysis of the  
28 National Population Health Survey. *Can J Public Health* 2002;**93**(3):193-97.  
29  
30  
31  
32  
33  
34 46. Kelleher CC, Whelan J, Daly L, *et al*. Socio-demographic, environmental, lifestyle and  
35 psychosocial factors predict self rated health in Irish Travellers, a minority nomadic  
36 population. *Health Place* 2012;**18**(2):330-38.  
37  
38  
39  
40  
41  
42  
43 47. Kelleher CC, Friel S, Nic Gabhainn S, *et al*. Socio-demographic predictors of self-rated  
44 health in the Republic of Ireland: findings from the National Survey on Lifestyle, Attitudes  
45 and Nutrition, SLAN. *Soc Sci Med* 2003;**57**(3):477-86.  
46  
47  
48  
49  
50  
51  
52 48. Eiser C, Morse R. Can parents rate their child's health-related quality of life? Results of a  
53 systematic review. *Qual Life Res* 2001;**10**(4):347-57.  
54  
55  
56  
57  
58  
59  
60

- 1  
2  
3 49. Upton P, Lawford J, Eiser C. Parent-child agreement across child health-related quality of  
4  
5 life instruments: a review of the literature. *Qual Life Res* 2008;**17**(6):895-913.  
6  
7  
8  
9  
10 50. Norrby U, Nordholm L, Fasth A. Reliability and validity of the swedish version of child  
11  
12 health questionnaire. *Scand J Rheumatol* 2003;**32**(2):101-7.  
13  
14  
15  
16 51. Davis E, Nicolas C, Waters E, *et al*. Parent-proxy and child self-reported health-related  
17  
18 quality of life: using qualitative methods to explain the discordance. *Qual Life Res*  
19  
20 2007;**16**(5):863-71.  
21  
22  
23  
24  
25 52. Theunissen NC, Vogels TG, Koopman HM, *et al*. The proxy problem: child report versus  
26  
27 parent report in health-related quality of life research. *Qual Life Res* 1998;**7**(5):387-97.  
28  
29  
30  
31  
32 53. Varni JW, Limbers CA, Burwinkle TM. Parent proxy-report of their children's health-  
33  
34 related quality of life: an analysis of 13,878 parents' reliability and validity across age  
35  
36 subgroups using the PedsQL 4.0 Generic Core Scales. *Health Qual Life Outcomes*  
37  
38 2007;**5**:2.  
39  
40  
41  
42  
43 54. Spencer NJ, Coe C. The development and validation of a measure of parent-reported child  
44  
45 health and morbidity: the Warwick Child Health and Morbidity Profile. *Child Care Health*  
46  
47 *Dev* 1996;**22**(6):367-79.  
48  
49  
50  
51  
52 55. Spencer NJ, Coe C. Validation of the Warwick Child Health and Morbidity Profile in  
53  
54 routine child health surveillance. *Child Care Health Dev* 2000;**26**(4):323-36.  
55  
56  
57  
58  
59  
60

- 1  
2  
3 56. McCormick MC, Brooks-Gunn J, Workman-Daniels K, *et al.* Maternal rating of child  
4 health at school age: does the vulnerable child syndrome persist ? *Pediatrics*  
5 1993;**92**(3):380-88.  
6  
7  
8  
9  
10  
11 57. McCormick MC, Brooks-Gunn J, Shorter T, *et al.* Factors associated with maternal rating  
12 of infant health in central Harlem. *J Dev Behav Pediatr* 1989;**10**(3):139-44.  
13  
14  
15  
16  
17 58. McCormick MC, Athreya BH, Bernbaum JC, *et al.* Preliminary observations on maternal  
18 rating of health of children: data from three subspecialty clinics. *J Clin Epidemiol*  
19 1988;**41**(4):323-29.  
20  
21  
22  
23  
24  
25  
26  
27 59. Lynch JL. Infant health, race/ethnicity, and early educational outcomes using the ECLS-B.  
28 *Sociol Inq* 2011;**81**(4):499-526.  
29  
30  
31  
32  
33  
34 60. Gilman SE, McCormick MC. Insights from life course epidemiology. *Acad Pediatr*  
35 2010;**10**(3):159-60.  
36  
37  
38  
39  
40  
41 61. Smith KW, Avis NE, Assmann SF. Distinguishing between quality of life and health status  
42 in quality of life research: a meta-analysis. *Qual Life Res* 1999;**8**(5):447-59.  
43  
44  
45  
46  
47 62. Pinhas-Hamiel O, Singer S, Pilpel N, *et al.* Health-related quality of life among children  
48 and adolescents: associations with obesity. *Int J Obes (Lond)* 2006;**30**(2):267-72.  
49  
50  
51  
52  
53  
54 63. Williams J, Wake M, Hesketh K, *et al.* Health-related quality of life of overweight and  
55 obese children. *JAMA* 2005;**293**(1):70-6.  
56  
57  
58  
59  
60



- 1  
2  
3  
4  
5 64. de Beer M, Hofsteenge GH, Koot HM, *et al.* Health-related-quality-of-life in obese  
6 adolescents is decreased and inversely related to BMI. *Acta Paediatr* 2007;**96**(5):710-14.  
7  
8  
9  
10  
11 65. Shibli R, Rubin L, Akons H, *et al.* Morbidity of overweight ( $\geq 85$ th percentile) in the first 2  
12 years of life. *Pediatrics* 2008;**122**(2):267-72.  
13  
14  
15  
16  
17 66. Suglia SF, Chambers EC, Rosario A, *et al.* Asthma and obesity in three-year-old urban  
18 children: role of sex and home environment. *J Pediatr* 2011;**159**(1):14-20.e11.  
19  
20  
21  
22  
23 67. Tai A, Volkmer R, Burton A. Association between asthma symptoms and obesity in  
24 preschool (4-5 year old) children. *J Asthma* 2009;**46**(4):362-65.  
25  
26  
27  
28  
29  
30  
31 68. Slining M, Adair LS, Goldman BD, *et al.* Infant overweight is associated with delayed  
32 motor development. *J Pediatr* 2010;**157**(1):20-5.e21.  
33  
34  
35  
36  
37 69. Williams JW, Canterford L, Hesketh KD, *et al.* Changes in body mass index and health  
38 related quality of life from childhood to adolescence. *Int J Pediatr Obes* 2011;**6**(2-2):e442-  
39 e448.  
40  
41  
42  
43  
44  
45  
46  
47 70. Marmot M, Friel S, Bell R, *et al.* Closing the gap in a generation: health equity through  
48 action on the social determinants of health. *Lancet* 2008;**372**(9650):1661-69.  
49  
50  
51  
52  
53 71. Imai K, Gregg EW, Chen YJ, Zhang P, *et al.* The association of BMI with functional status  
54 and self-rated health in US adults. *Obesity (Silver Spring)* 2008;**16**(2):402-8.  
55  
56  
57  
58  
59  
60

- 1  
2  
3  
4  
5 72. Simonsen MK, Hundrup YA, Grønbaek M, *et al.* A prospective study of the association  
6 between weight changes and self-rated health. *BMC Womens Health* 2008;**8**:13.  
7  
8  
9  
10  
11  
12 73. Cameron AJ, Magliano DJ, Dunstan DW, *et al.* A bi-directional relationship between  
13 obesity and health-related quality of life: evidence from the longitudinal AusDiab study. *Int*  
14 *J Obes (Lond)* 2012;**36**(2):295-303.  
15  
16  
17  
18  
19  
20  
21 74. Sawyer MG, Harchak T, Wake M, *et al.* Four-year prospective study of BMI and mental  
22 health problems in young children. *Pediatrics* 2011;**128**(4):677-84.  
23  
24  
25  
26  
27  
28 75. Jansen PW, Mensah FK, Clifford S, *et al.* Bidirectional associations between overweight  
29 and health-related quality of life from 4-11 years: Longitudinal Study of Australian  
30 Children. *Int J Obes (Lond)* 2013;**37**(10):1307-13.  
31  
32  
33  
34  
35  
36  
37 76. Coneus K, Spiess CK. The intergenerational transmission of health in early childhood -  
38 evidence from the German Socio-Economic Panel Study. *Econ Hum Biol* 2012;**10**(1):89-  
39 97.  
40  
41  
42  
43  
44  
45 77. Case A, Lubotsky D, Paxson C. Economic status and health in childhood: the origins of the  
46 gradient. *Am Econ Rev* 2002;**92**(5):1308-34.  
47  
48  
49  
50  
51  
52 78. Silburn SR, Zubrick SR, Garton A, *et al.* Western Australia Child Health Survey: family  
53 and community health. Perth, Western Australia: Australian Bureau of Statistics and the  
54 TVW Telethon Institute for Child Health Research, 1996.  
55  
56  
57  
58  
59  
60

- 1  
2  
3  
4  
5 79. Waters E, Doyle J, Wolfe R, *et al.* Influence of parental gender and self-reported health and  
6 illness on parent-reported child health. *Pediatrics* 2000;**106**(6):1422-28.  
7  
8  
9  
10  
11  
12 80. Dadds MR, Stein RE, Silver EJ. The role of maternal psychological adjustment in the  
13 measurement of children's functional status. *J Pediatr Psychol* 1995;**20**(4):527-44.  
14  
15  
16  
17  
18 81. Boyd A, Golding J, Macleod J, *et al.* Cohort Profile: the 'children of the 90s'--the index  
19 offspring of the Avon Longitudinal Study of Parents and Children. *Int J Epidemiol*  
20 2013;**42**(1):111-27.  
21  
22  
23  
24  
25  
26  
27 82. Fraser A, Macdonald-Wallis C, Tilling K, *et al.* Cohort Profile: the Avon Longitudinal  
28 Study of Parents and Children: ALSPAC mothers cohort. *Int J Epidemiol* 2013;**42**(1):97-  
29 110.  
30  
31  
32  
33  
34  
35  
36 83. Howe L, Galobardes B, Tilling K, *et al.* Does drop-out from cohort studies bias estimates  
37 of socioeconomic inequalities in health? *J Epidemiol Community Health* 2011;**65**:A31.  
38  
39  
40  
41  
42  
43 84. Wolke D, Waylen A, Samara M, *et al.* Selective drop-out in longitudinal studies and non-  
44 biased prediction of behaviour disorders. *Br J Psychiatry* 2009;**195**(3):249-56.  
45  
46  
47  
48  
49 85. Nilsen RM, Vollset SE, Gjessing HK, *et al.* Self-selection and bias in a large prospective  
50 pregnancy cohort in Norway. *Paediatr Perinat Epidemiol* 2009;**23**(6):597-608.  
51  
52  
53  
54  
55  
56  
57  
58  
59  
60

**LICENCE FOR PUBLICATION STATEMENT**

The Corresponding Author has the right to grant on behalf of all authors and does grant on behalf of all authors, an exclusive licence (or non-exclusive for government employees) on a worldwide basis to the BMJ Group and co-owners or contracting owning societies (where published by the BMJ Group on their behalf), and its Licensees to permit this article (if accepted) to be published in any BMJ Group products and to exploit all subsidiary rights, as set out in our licence.

For peer review only

1  
2  
3 **Title: Preschoolers' parent rated health disparities are strongly associated with**  
4 **measures of adiposity in the Lifeways cohort study children**  
5  
6

7 **CORRESPONDING AUTHOR:**

8 Professor Cecily C Kelleher  
9 School of Public Health, Physiotherapy and Population Science,  
10 Woodview House,  
11 University College Dublin  
12 Belfield,  
13 Dublin 4, Republic of Ireland  
14 Tel: +3531 7162045  
15 Fax: +3531 7163421  
16 cecily.kelleher@ucd.ie  
17  
18  
19  
20  
21  
22  
23

24 **AUTHORS**

25 Aakash Shrivastava<sup>1</sup> PhD  
26 Celine Murrin<sup>1</sup> PhD  
27 Cecily C Kelleher<sup>1</sup> MD

28 <sup>1</sup>School of Public Health, Physiotherapy and Population Science, University College Dublin,  
29 Woodview House, Belfield, Dublin 4, Republic of Ireland  
30  
31  
32  
33  
34

35 **Running Title: Childhood obesity a persistent predictor of preschoolers' PRH**  
36  
37

38 **KEYWORDS**

39 Lifecourse, self-rated health, obesity, BMI, waist circumference, preschool children  
40  
41  
42

43 **Word count: 3340**  
44  
45  
46  
47  
48  
49  
50  
51  
52  
53  
54  
55  
56  
57  
58  
59  
60

**ABSTRACT (Words: 273)****Objective**

To examine the relationship between lifecourse factors from preschoolers' micro-ecosystem and their parent-reported (mother-reported) health (PRH), following them prospectively from preconception to age 5-years. To investigate if preschoolers' BMI and waist-circumference were associated with preschoolers' PRH when controlled for lifecourse predictors.

**Design**

Lifeways cross-generation cohort study

**Setting**

Ireland

**Participants**

Of 1082 families, 62% mothers responded on a health and lifestyle questionnaire at follow-up. Food frequency, BMI and waist-circumference were measured.

**Main outcome measure**

Mother-reported children's PRH at age-5. Associations with child's individual and familial exposures from preconception to age 5-years examined using logistic regression.

**Results**

In univariate analysis, relatively-positive rating of children's PRH were associated with children's lower intake of fats [OR(95%CI)=2.2(1.1-4.3)], higher intake of fruits/vegetables [OR(95%CI)=2.2(1.1-4.3)]; as well as familial socio-economic characteristics {higher household income [OR(95%CI)=3.0(1.6-5.9)], non-entitlement to means-tested healthcare [OR(95%CI)=2.1(1.0-4.3)], mothers' higher education [OR(95%CI)=1.9(1.0-3.6)]}, psycho-

1  
2  
3 social characteristics {father's participation in study [OR(95%CI)=2.1(1.0-4.3)], mothers'  
4 perceiving better support from partner [OR(95%CI)=2.3(1.2-4.3)], children  
5 [OR(95%CI)=1.9(1.0-3.7)] or relatives [OR(95%CI)=2.2(1.1-4.1)]}, parents' lifestyle  
6 {mothers' lower intake of energy [OR(95%CI)=2.2(1.1-4.3)], fathers' non-smoking status  
7 [OR(95%CI)=2.2(1.1-4.4)]}, and parents' health {mothers' self-rated health relatively-  
8 positive [OR(95%CI)=5.1(2.6-9.9)], fathers' self-rated health relatively-positive  
9 [OR(95%CI)=3.0(1.5-6.0)]}.

10  
11  
12 In multivariable analysis ( $\chi^2=34.2, df=21, N=303, R^2=0.26, p<0.05$ ), one of the two strong  
13 predictors of children's relatively-positive PRH was child not being obese by International  
14 Obesity Task Force classification [OR(95%CI)=5.5(1.4-21.0)], observed also using BMI  
15 ( $\text{kg/m}^2$ ) [OR(95%CI)=0.73(0.58-0.93)] or waist-circumference (cm) [OR(95%CI)=0.89(0.81-  
16 0.98)] as continuous variables. The other significant predictor was mothers' self-rated health  
17 relatively-positive [OR(95%CI)=4.2(1.5-12.2)].

### 32 **Conclusions**

33  
34  
35 Preschoolers' health is adversely associated with obesity and this is independent of lifecourse  
36 social and environmental inequalities. **The findings suggest that lifecourse adversities during**  
37 **the early developmental stage may get embedded and expressed as anthropometric measures**  
38 **of adiposity, suggesting that public health interventions should begin as early as possible.**  
39  
40  
41  
42  
43  
44  
45  
46  
47  
48  
49  
50  
51  
52  
53  
54  
55  
56  
57  
58  
59  
60

### Strengths and limitations of this study

- Nationally representative sample of preschool-age children
- Examines the influence of lifecourse adversities, prospectively measured from preconception to age 5 on children's general health at age 5. The study analyses demographic, anthropometric, lifestyle, food and nutrients intake, psycho-social, socio-economic and health-related exposures from both children's individual as well as parental experiences.
- Demonstrates a significant and independent association between preschoolers' measured BMI as well as waist circumference and their general health status.
- The study is limited by a relatively small sample and use of parent-reported health status.



## MAIN TEXT

### Introduction

The development of children is critical to their adult well-being<sup>[1,2]</sup> and across the lifecourse even subjective estimates may be useful to reflect objectively measured health<sup>[3,4]</sup>. Bronfenbrenner<sup>[5]</sup> emphasised the importance of children's micro-ecosystem in their development. Recently, the World Health Organisation's (WHO) **Commission on Social Determinants of Health (CSDH)** presented a **Total Environment Assessment Model for Early Child Development (TEAM-ECD)**,<sup>[6]</sup> which again illustrates the importance of individual and family spheres of influence on children's health. The relevance of socio-economic, psycho-social and lifestyle environment in child development and health is widely acknowledged.<sup>[6-8]</sup> According to the lifecourse hypothesis, risk transmission is characterised by critical periods and accumulation of risk models.<sup>[9]</sup> **Life Course Health Development (LCHD) framework<sup>[10]</sup> suggests that health is a consequence of multiple determinants that change in context of time and circumstances as an individual develops; these experiences are programmed into bio-behavioural regulatory systems during certain critical and sensitive periods of individual's lifetime to decide their health trajectory. The lifecourse framework on childhood disadvantage and adult health<sup>[11]</sup> suggests that parental and childhood circumstances from the point of conception influences individual's health in later life, and the individual's childhood health and later life circumstances may further add to this foundation.** Based on this, Hertzman and colleagues<sup>[12]</sup> examined self-rated health in adulthood using an integrated lifecourse framework. There are a few other studies also which have examined lifecourse determinants of adult global<sup>[13,14]</sup> or specific health status.<sup>[15]</sup> On the contrary, the literature on the determinants of child global health status is sparse,<sup>[16,17]</sup> particularly for the preschool-age children.<sup>[18]</sup> Even rarer are studies whose examination includes early lifecourse determinants of child global health status.

1  
2  
3 Thus the first objective of our analysis was to prospectively examine the relationship between  
4 demographic, anthropometric, lifestyle, nutritional, psycho-social, socio-economic and  
5 health-related lifecourse exposures taken from the children's individual and family spheres of  
6 influence starting from preconception up to age 5-years and their global health status at  
7 preschool-age.  
8  
9

10  
11  
12 In social epidemiology, the construct of "embodiment" refers to biological expression of  
13 individuals' materio-social world.<sup>[19,20]</sup> Similarly in lifecourse epidemiology, it is  
14 hypothesised that early life experiences get "biologically embedded" during critical or  
15 sensitive periods of child development leading to gradients in health.<sup>[21,22]</sup>  
16  
17  
18  
19  
20  
21  
22

23  
24 The Foresight report identifies a large array of environmental determinants of obesity, a  
25 number of which are again related to early child development.<sup>[23]</sup> This suggests obesity as  
26 pivotal risk factor for subsequent health conditions.<sup>[24]</sup>  
27  
28  
29  
30

31 The negative relationship between obesity and self-rated health is now increasingly reported  
32 in adult populations,<sup>[25,26]</sup> some indicating a temporal relationship<sup>[27,28]</sup> and suggesting that  
33 obesity increases health inequalities over time.<sup>[28]</sup> However, evidence on the relationship  
34 between obesity and health is relatively limited in child population studies and those  
35 available have reported health-related-quality-of-life (HR-QoL)<sup>[29]</sup> instead of a generic  
36 measure such as global self-rated health. Moreover, this association is yet to be established  
37 for preschool-age children. To our knowledge just two population based studies have  
38 examined this association in preschool age-group children<sup>[30,31]</sup> and neither had nutritional  
39 information.  
40  
41  
42  
43  
44  
45  
46  
47  
48  
49  
50

51 In the Longitudinal Study of Australian Children, Wake *et al.*<sup>[30]</sup> did not find a significant  
52 difference in global health status of overweight/obese and normal weight 4-5-year-old  
53 children. Skinner *et al.*,<sup>[31]</sup> using data on 3-5-year-olds from the US National Health and  
54  
55  
56  
57  
58  
59  
60

1  
2  
3 Nutrition Examination Survey, reported a poorer global health status in obese and severely  
4 obese preschoolers. Neither of these studies accounted for a number of possibly relevant  
5 confounders, including parental BMI, parental health and nutritional variables.  
6  
7  
8

9  
10 We thus hypothesised that similar to findings from studies on older age-groups,  
11 anthropometric markers of child obesity in our preschool-age children study would also  
12 demonstrate a negative association with their global health status. The next objective of our  
13 analysis was to examine whether anthropometric markers of child obesity would emerge as  
14 strong predictors of global health status when accounted for other socio-economic, psycho-  
15 social, and lifestyle environmental factors in a multivariable model.  
16  
17  
18  
19  
20  
21  
22

## 23 **Methods**

24  
25 The Lifeways cross generation cohort study comprises three generations of 1082 Irish  
26 families and was established in 2001-03; the recruitment procedure of this nationally  
27 representative cohort has been described previously.<sup>[32-34]</sup> The a priori purpose was to  
28 examine familial and cross-generation influences on early childhood development over the  
29 first five years of children's lives. Briefly, would-be mothers were at random recruited from  
30 the two regional maternity hospitals in the Republic of Ireland to get a representative sample.  
31  
32  
33  
34  
35  
36  
37  
38  
39

40 *A comparison between the Lifeways mothers and a nationally representative sample of*  
41 *women of the same age group from the SLÁN (Survey of Lifestyle, Attitudes and Nutrition)*  
42 *surveys of Republic of Ireland<sup>[35]</sup> confirmed that the Lifeways mothers were satisfactorily*  
43 *representative of the Irish general women on socio-demographic characteristics.<sup>[33]</sup>*  
44  
45  
46  
47  
48

49 At this early pregnancy stage mothers completed a health and lifestyle status questionnaire  
50 adapted from a validated instrument developed for Irish national SLÁN surveys.<sup>[35]</sup> Mothers  
51 reported their pre-pregnancy height (cm) and weight (kg) and their smoking status during  
52 pregnancy. Mothers' and partners' socio-economic status was recorded. Subsequently at  
53  
54  
55  
56  
57  
58  
59  
60

1  
2  
3 birth, the live infants were added to the cohort along-with maternity and birth related hospital  
4 information.  
5

6  
7  
8 In 2007-08, when these children averaged five years of age, the cohort follow-up recorded a  
9 62% response rate.<sup>[34,36]</sup> **Though mothers who responded to the follow-up were more likely to**  
10 **be of higher socioeconomic status, these mothers** did not significantly differ in their baseline  
11 **anthropometric characteristics (including BMI)** from non-responders.<sup>[34,36]</sup> At this 5-year  
12 follow-up, mothers repeated the health and lifestyle assessment questionnaire, with additional  
13 questions related to her family, including a five-level likert item question “In general, would  
14 you say your / your partner’s / your Lifeways child’s current health is Excellent, Very Good,  
15 Good, Fair or Poor”. Mothers provided information on family’s socio-economic, psycho-  
16 social, and lifestyle status. Mothers reported their habitual dietary intake for the previous year  
17 on a semi-quantitative food frequency (SQFFQ) instrument developed from the EPIC study  
18 (European Prospective Investigation into Cancer and Nutrition) and validated for Irish adult  
19 population.<sup>[37]</sup> Mothers also gave details for the Lifeways child’s habitual diet for the  
20 previous year using a different SQFFQ instrument adapted from the UK National Diet and  
21 Nutrition Survey of 4.5-year-old children.<sup>[38]</sup> The mothers’ and children’s SQFFQ were  
22 validated in the Lifeways study using a 7-day weighed food diary in a sub-sample.<sup>[36]</sup> Food  
23 items were aggregated by defined shelves (**food groups**) of the Irish food pyramid and  
24 assessment was made for average servings per day of standard food item portions consumed  
25 from the “top” and “fruit and vegetable” **food groups** (shelves of **Irish food pyramid**). The  
26 “top” **food group** comprises of high calorie fat and sugar rich foods. Total energy (kcal) and  
27 total fats (g) intake were computed using conversion values from McCance & Widdowson’s  
28 food composition tables<sup>[39]</sup> with a specially developed FFQ software version 1.0 ©.<sup>[40]</sup>  
29  
30  
31  
32  
33  
34  
35  
36  
37  
38  
39  
40  
41  
42  
43  
44  
45  
46  
47  
48  
49  
50  
51  
52  
53

54  
55 Mothers and children, and if available fathers, were offered at 5-year follow-up an  
56 anthropometric assessment at their home for height (**cm**), weight (**kg**) and waist  
57  
58  
59  
60

1  
2  
3 circumference (cm) using a standardised protocol,<sup>[34,36]</sup> with 80-85% mothers and children  
4  
5 participating. Body mass index (BMI) was calculated from weight and height information  
6  
7 (kg/m<sup>2</sup>).  
8

9  
10 Thus variables from discrete stages (pre-pregnancy, early pregnancy, at birth, early infancy  
11  
12 and 5-year follow-up) of child's early development representing lifecourse exposures from  
13  
14 distinct domains (demographic, anthropometric, socio-economic, psycho-social, lifestyle,  
15  
16 nutritional and health) of child's individual and family spheres of influence<sup>[6-8]</sup> were  
17  
18 considered to analyse determinants of child's health status at age-5. The selection of  
19  
20 variables, domains and spheres of influence are based on the CSDH constructed TEAM-  
21  
22 ECD, a model of early child development.<sup>[6-8]</sup> These lifecourse variables have been  
23  
24 summarised as per time frame in **Table 1**. This lifecourse time frame highlights the stages  
25  
26 and transition points relevant from perspective of child's health development.<sup>[10]</sup> Additional  
27  
28 details on these variables are provided in **eTable 1** available in the web only supplement. The  
29  
30 independent variables have been arranged as child-related, family-related, mother-related,  
31  
32 father-related groups for ease of presentation.  
33  
34  
35  
36  
37  
38  
39  
40  
41  
42  
43  
44  
45  
46  
47  
48  
49  
50  
51  
52  
53  
54  
55  
56  
57  
58  
59  
60

Table 1: Independent variables examined from lifecourse of 5-yr-old children

| Lifecourse                      | Independent Variables                                                                                                                                                                                                                                                                                                                                                                                                                                                                                                                                                                                                                                    |
|---------------------------------|----------------------------------------------------------------------------------------------------------------------------------------------------------------------------------------------------------------------------------------------------------------------------------------------------------------------------------------------------------------------------------------------------------------------------------------------------------------------------------------------------------------------------------------------------------------------------------------------------------------------------------------------------------|
| Pre-pregnancy                   | Maternal Pre-pregnancy BMI                                                                                                                                                                                                                                                                                                                                                                                                                                                                                                                                                                                                                               |
| Early pregnancy                 | Family stability<br>Maternal smoking in pregnancy, Maternal Education level<br>Paternal Education level                                                                                                                                                                                                                                                                                                                                                                                                                                                                                                                                                  |
| Birth                           | Child's Birth-weight, Gestational age, Gender<br>Maternal Parity                                                                                                                                                                                                                                                                                                                                                                                                                                                                                                                                                                                         |
| Infancy                         | Child's breastfeeding status                                                                                                                                                                                                                                                                                                                                                                                                                                                                                                                                                                                                                             |
| When children averaged 5-yr age | Child's Age, Height, BMI, Waist circumference, Food intake: top and fruits & vegetables <b>food groups</b> , Nutrient intake: energy and fats intake<br>Family household weekly income, Entitlement to means tested healthcare benefits scheme, Family structure (marital status), Support from partner, parents, children & relatives<br>Maternal Age, Height, BMI, Waist circumference, Smoking, Employment status, Food intake: top and fruits & vegetables <b>food groups</b> , Nutrient intake: energy and fats intake, Self-rated health status<br>Paternal Height, BMI, Waist circumference, Smoking, Employment status, Self-rated health status |

Children's global health status rated in proxy by their mothers, hereafter referred to as parent-rated health (PRH), was the outcome variable of interest. The 5-graded scale response was dichotomised as relatively-positive health (excellent or very good) and relatively-negative health (poor or fair or good), based on similar dichotomisation in other studies on preschool and school children.<sup>[17,18,30]</sup> It is reasonable to take a higher cut-off when dichotomising this age dependent variable in this very young age-group as there would be very limited numbers of poor or fair health children.<sup>[17,18,41]</sup>

Initially, uni-variate associations were established between the independent predictors and children's PRH using independent t-tests or chi-square tests. Independent categorical variables were dichotomised in a manner that allowed contrasting extreme levels against the others. Thus, using International Obesity Task Force (IOTF) cut-offs, children's BMI was dichotomised as obese versus over-weight or normal-weight. Similarly nutrition variables ordered in quintiles were dichotomised as the extreme quintile (1<sup>st</sup> or 5<sup>th</sup>) versus the rest.

1  
2  
3 From these independent variables principally chosen on the basis of their relevance to the  
4 child's development,<sup>[6-8]</sup> all those that qualified at significance level 20% ( $p < 0.2$ )<sup>[42]</sup> in  
5 univariate analyses were force entered into a multivariable logistic regression model. BMI  
6 ( $\text{kg/m}^2$ ) and waist circumference (cm), the anthropometric markers of obesity, were tested  
7 separately in independent multivariable models. Initially BMI was tested as a categorical  
8 variable in a model, followed by two additional models substituting it with BMI and then  
9 waist circumference as continuous variables. Other independent variables were tested as  
10 categorical variables.  
11  
12  
13  
14  
15  
16  
17  
18  
19

20  
21 Ethical approval for the Lifeways study was obtained respectively from ethical committees of  
22 participating hospitals and the University College Dublin, Ireland. Written informed consent  
23 was obtained from study participants.  
24  
25  
26  
27

## 28 Results

29  
30  
31 There were 547 family datasets available for analysis of children's PRH. **Table 2** presents the  
32 uni-variate associations between children's lifecourse variables and PRH. Within the  
33 individual-sphere of influences, children's lifestyle behaviours (lower intake of fatty/sugary  
34 foods and total fats, and higher intake of fruits/vegetables) and their anthropometric measures  
35 at age-5 (not being obese, lower BMI, and lower waist circumference) qualified as  
36 determinants of children's relatively-positive PRH for further examination in the  
37 multivariable model.  
38  
39  
40  
41  
42  
43  
44  
45  
46

47 In other words, retaining  $p < 0.2$  as the criterion for significance, the children's healthy food  
48 and nutrient intake habits – such as decreased intake of unhealthy fat- and sugar- rich foods  
49 (servings/day) [OR(95%CI)=1.7(0.8-3.4)] or total fats (g) in their meals  
50 [OR(95%CI)=2.2(1.1-4.3)] and increased intake of healthy fruits and vegetables  
51 (servings/day) [OR(95%CI)=2.2(1.1-4.3)] were positively associated with their favourable  
52  
53  
54  
55  
56  
57  
58  
59  
60

1  
2  
3 rating for health by their mothers. Conversely, children's increased BMI (kg/m<sup>2</sup>)  
4 [OR(95%CI)=0.85(0.71-1.03)] and waist circumference (cm) [OR(95%CI)=0.95(0.88-1.02)]  
5  
6  
7 were inversely associated with a positive parental-rated health status.  
8  
9

10 Within the family-sphere of influences, socio-economic status (higher household income,  
11 non-entitlement to subsidised healthcare, both parents' higher education status, and father's  
12 employment status), psycho-social status (father's study participation, mother's perceived  
13 social support), mother's lifestyle behaviours (lower intake of fatty/sugary foods, total energy  
14 and total fats), father's lifestyle behaviours (non-smoker), and both parents' health status  
15 (relatively-positive self-rated health) qualified as determinants of children's relatively-  
16 positive PRH for further examination in the multivariable model.  
17  
18  
19  
20  
21  
22  
23  
24

25  
26 In other words, by maintaining  $p < 0.2$  as the criterion for significance, several indicators of a  
27 family's better socio-economic status— such as increased household income (Euros/week)  
28 [OR(95%CI)=3.0(1.6-5.9)], not requiring subsidised healthcare [OR(95%CI)=2.1(1.0-4.3)],  
29 mother having a third level education [OR(95%CI)=1.9(1.0-3.6)], father having a third level  
30 education [OR(95%CI)=1.9(1.0-3.6)], father being self-employed [OR(95%CI)=2.5(0.8-  
31 7.9)]; family's better psycho-social status— such as father's involvement in family affairs  
32 [OR(95%CI)=2.1(1.0-4.3)], mother's perceiving a positive social support from spouse  
33 [OR(95%CI)=2.3(1.2-4.3)], parents [OR(95%CI)=2.0(1.0-4.1)], children  
34 [OR(95%CI)=1.9(1.0-3.7)], or relatives [OR(95%CI)=2.2(1.1-4.1)]; family's better lifestyle  
35 and food and nutrient intake habits— such as mother's decreased intake of unhealthy fat- and  
36 sugar- rich foods (servings/day) [OR(95%CI)=1.7(0.8-3.4)], total energy (kcal)  
37 [OR(95%CI)=2.2(1.1-4.3)] and total fats (g) [OR(95%CI)=1.7(0.8-3.4)] in her meals, father's  
38 not being a smoker [OR(95%CI)=2.2(1.1-4.4)]; and family's better health status— such as  
39 mother [OR(95%CI)=5.1(2.6-9.9)] and father [OR(95%CI)=3.0(1.5-6.0)] having a positively  
40  
41  
42  
43  
44  
45  
46  
47  
48  
49  
50  
51  
52  
53  
54  
55  
56  
57  
58  
59  
60



1  
2  
3 rated health status were positively associated with children's favourable rating for health by  
4  
5 their mothers.  
6  
7  
8  
9  
10  
11  
12  
13  
14  
15  
16  
17  
18  
19  
20  
21  
22  
23  
24  
25  
26  
27  
28  
29  
30  
31  
32  
33  
34  
35  
36  
37  
38  
39  
40  
41  
42  
43  
44  
45  
46  
47  
48  
49  
50  
51  
52  
53  
54  
55  
56  
57  
58  
59  
60

For peer review only

Table 2: Uni-variate lifecourse associates of children's relatively-positive parent-rated health, PRH (N=547)

|                                               | Relatively Negative PRH |                          | Relatively Positive PRH   |      | OR                        | 95% CI |
|-----------------------------------------------|-------------------------|--------------------------|---------------------------|------|---------------------------|--------|
|                                               | N                       | (n=42)<br>%(n) Mean (SD) | (n=505)<br>%(n) Mean (SD) |      |                           |        |
| <b>Child's Individual Characteristics</b>     |                         |                          |                           |      |                           |        |
| Birth-weight adjusted for gestational age (g) | 487                     | (34) 3564.1 (616)        | (453) 3548.4 (552)        | 1.00 | (0.999-1.001)             |        |
| Child's Age (Yrs)                             | 547                     | (42) 5.42 (0.23)         | (505) 5.46 (0.25)         |      |                           |        |
| Gender                                        | 547                     |                          |                           |      |                           |        |
| Male                                          |                         | 8.0% (22)                | 92.0% (242)               | Ref  |                           |        |
| Female                                        |                         | 7.1% (21)                | 92.9% (262)               | 1.14 | (0.60-2.20)               |        |
| BMI (kg/m <sup>2</sup> )                      | 464                     | (35) 17.09 (2.5)         | (429) 16.59 (1.6)         | 0.85 | (0.71-1.03) <sup>^</sup>  |        |
| BMI [IOTF]                                    | 464                     |                          |                           |      |                           |        |
| Obese                                         |                         | 16.7% (5)                | 83.3% (25)                | Ref  |                           |        |
| Overweight / Normal                           |                         | 6.9% (30)                | 93.1% (404)               | 2.69 | (0.96-7.54) <sup>^</sup>  |        |
| Waist Circumference (cm)                      | 462                     | (35) 57.01 (6.8)         | (427) 55.88 (4.3)         | 0.95 | (0.88-1.02) <sup>†</sup>  |        |
| Height (cm)                                   | 464                     | (35) 111.6 (5.6)         | (429) 112.1 (4.8)         | 1.02 | (0.95-1.10)               |        |
| Breastfeeding                                 | 528                     |                          |                           |      |                           |        |
| Not breastfed                                 |                         | 6.5% (16)                | 93.5% (229)               | Ref  |                           |        |
| Breastfed                                     |                         | 8.8% (25)                | 91.2% (258)               | 0.72 | (0.38-1.38)               |        |
| Energy (Kcal)                                 | 547                     |                          |                           |      |                           |        |
| Quintile 5 (>1794 kcal)                       |                         | 10% (11)                 | 90.0% (99)                | Ref  |                           |        |
| Quintile 1-4                                  |                         | 7.1% (31)                | 92.9% (406)               | 1.46 | (0.71-3.00)               |        |
| Fats (g)                                      | 547                     |                          |                           |      |                           |        |
| Quintile 5 (>62.9 g)                          |                         | 12.8% (14)               | 87.2% (95)                | Ref  |                           |        |
| Quintile 1-4                                  |                         | 6.4% (28)                | 93.6% (410)               | 2.16 | (1.09-4.26) <sup>*</sup>  |        |
| Top food group (servings/day)                 | 547                     |                          |                           |      |                           |        |
| Quintile 5 (>6.47 servings)                   |                         | 10.9% (12)               | 89.1% (98)                | Ref  |                           |        |
| Quintile 1-4                                  |                         | 6.9% (30)                | 93.1% (407)               | 1.66 | (0.82-3.36) <sup>†</sup>  |        |
| Fruits Veg food group (servings/d)            | 547                     |                          |                           |      |                           |        |
| Quintile 1 (<2.1 servings)                    |                         | 12.8% (14)               | 87.2% (95)                | Ref  |                           |        |
| Quintile 2-5                                  |                         | 6.4% (28)                | 93.6% (410)               | 2.16 | (1.09-4.26) <sup>*</sup>  |        |
| <b>Family Characteristics</b>                 |                         |                          |                           |      |                           |        |
| Household Weekly Income                       | 509                     |                          |                           |      |                           |        |
| Less than 760 Euros/wk                        |                         | 13.3% (26)               | 86.7% (170)               | Ref  |                           |        |
| More than 760 Euros/wk                        |                         | 4.8% (15)                | 95.2% (298)               | 3.04 | (1.57-5.90) <sup>**</sup> |        |
| Entitlement to General Medical Card           | 532                     |                          |                           |      |                           |        |
| Entitled                                      |                         | 13% (12)                 | 87.0% (80)                | Ref  |                           |        |
| Not entitled                                  |                         | 6.6% (29)                | 93.4% (411)               | 2.13 | (1.04-4.34) <sup>*</sup>  |        |
| Fathers' Participation                        | 547                     |                          |                           |      |                           |        |
| Not                                           |                         | 9.7% (31)                | 90.3% (290)               | Ref  |                           |        |
| Yes                                           |                         | 4.9% (11)                | 95.1% (215)               | 2.09 | (1.03-4.25) <sup>*</sup>  |        |
| Marital Status                                | 542                     |                          |                           |      |                           |        |
| Others                                        |                         | 11.4% (5)                | 88.6% (39)                | Ref  |                           |        |
| Married/Cohabiting                            |                         | 7.2% (36)                | 92.8% (462)               | 1.65 | (0.61-4.43)               |        |
| Elder children in family (Parity)             | 535                     |                          |                           |      |                           |        |
| Nullipara                                     |                         | 8% (18)                  | 92.0% (207)               | Ref  |                           |        |
| Multipara                                     |                         | 7.7% (24)                | 92.3% (286)               | 1.04 | (0.55-1.96)               |        |
| Support from Spouse/Partner                   | 538                     |                          |                           |      |                           |        |
| Lesser support                                |                         | 12.9% (17)               | 87.1% (115)               | Ref  |                           |        |
| More support                                  |                         | 6.2% (25)                | 93.8% (381)               | 2.25 | (1.18-4.32) <sup>*</sup>  |        |
| Support from Parents                          | 487                     |                          |                           |      |                           |        |
| Lesser support                                |                         | 12.5% (12)               | 87.5% (84)                | Ref  |                           |        |
| More support                                  |                         | 6.6% (26)                | 93.4% (365)               | 2.01 | (0.97-4.14) <sup>^</sup>  |        |
| Support from Children                         | 532                     |                          |                           |      |                           |        |
| Lesser support                                |                         | 10.6% (20)               | 89.4% (169)               | Ref  |                           |        |
| More support                                  |                         | 5.8% (20)                | 94.2% (323)               | 1.91 | (1.00-3.65) <sup>*</sup>  |        |
| Support from Close Relatives                  | 510                     |                          |                           |      |                           |        |
| Lesser support                                |                         | 12.4% (19)               | 87.6% (134)               | Ref  |                           |        |
| More support                                  |                         | 6.2% (22)                | 93.8% (335)               | 2.16 | (1.13-4.12) <sup>*</sup>  |        |

Table 2: Uni-variate lifecourse associates of children's relatively-positive parent-rated health, PRH (continued)

|                                            | N   | Relatively Negative PRH<br>(n=42) |             | Relatively Positive PRH<br>(n=505) |             | OR   | 95% CI        |
|--------------------------------------------|-----|-----------------------------------|-------------|------------------------------------|-------------|------|---------------|
|                                            |     | %(n)                              | Mean (SD)   | %(n)                               | Mean (SD)   |      |               |
| <b>Maternal Characteristics</b>            |     |                                   |             |                                    |             |      |               |
| Pre-pregnancy BMI (kg/m <sup>2</sup> )     | 475 | (36)                              | 23.3 (3.3)  | (439)                              | 23.8 (3.9)  | 1.04 | (0.94-1.14)   |
| Pre-pregnancy BMI [WHO cut offs]           |     |                                   |             |                                    |             |      |               |
| Obese                                      |     | 2.6% (1)                          |             | 97.4% (38)                         |             | Ref  |               |
| Overweight / Normal                        |     | 8% (35)                           |             | 92.0% (401)                        |             | 0.30 | (0.04-2.26)   |
| Mother's Age (Yrs)                         | 546 | (42)                              | 36.5 (6.3)  | (504)                              | 37.1 (5.3)  | 1.02 | (0.96-1.08)   |
| BMI at 5-yr follow-up (kg/m <sup>2</sup> ) | 432 |                                   | 25.6 (3.9)  |                                    | 26.3 (5.0)  | 1.03 | (0.95-1.12)   |
| BMI at 5-yr follow-up [WHO cut offs]       | 432 |                                   |             |                                    |             |      |               |
| Obese                                      |     | 7.2% (5)                          |             | 92.8% (64)                         |             | Ref  |               |
| Overweight / Normal                        |     | 7.4% (27)                         |             | 92.6% (336)                        |             | 0.97 | (0.36-2.62)   |
| Waist Circumference (cm)                   | 434 | (31)                              | 85.3 (10.6) | (403)                              | 87.6 (11.9) | 1.02 | (0.99-1.05)   |
| Height (cm)                                | 454 | (33)                              | 161.9 (6.8) | (421)                              | 162.9 (6.0) | 1.03 | (0.97-1.09)   |
| Smoking in pregnancy                       | 534 |                                   |             |                                    |             |      |               |
| Smoker                                     |     | 8.1% (8)                          |             | 91.9% (91)                         |             | Ref  |               |
| Non-Smoker                                 |     | 7.6% (33)                         |             | 92.4% (402)                        |             | 1.07 | (0.48-2.4)    |
| Smoking at 5-yr follow-up                  | 541 |                                   |             |                                    |             |      |               |
| Smoker                                     |     | 7.6% (9)                          |             | 92.4% (110)                        |             | Ref  |               |
| Non-Smoker                                 |     | 7.6% (32)                         |             | 92.4% (390)                        |             | 1.0  | (0.46-2.15)   |
| Energy (Kcal)                              | 546 |                                   |             |                                    |             |      |               |
| Quintile 5 (>2570.9 kcal)                  |     | 13% (14)                          |             | 87.0% (94)                         |             | Ref  |               |
| Quintile 1-4                               |     | 6.4% (28)                         |             | 93.6% (410)                        |             | 2.18 | (1.11-4.30)*  |
| Fats (g)                                   | 546 |                                   |             |                                    |             |      |               |
| Quintile 5 (>106 g)                        |     | 11% (12)                          |             | 89.0% (97)                         |             | Ref  |               |
| Quintile 1-4                               |     | 6.9% (30)                         |             | 93.1% (407)                        |             | 1.68 | (0.83-3.40)†  |
| Top food group (servings/day)              | 545 |                                   |             |                                    |             |      |               |
| Quintile 5 (>8.35 servings)                |     | 11% (12)                          |             | 89.0% (97)                         |             | Ref  |               |
| Quintile 1-4                               |     | 6.9% (30)                         |             | 93.1% (406)                        |             | 1.67 | (0.83-3.39)†  |
| Fruits Veg food group (servings/day)       | 546 |                                   |             |                                    |             |      |               |
| Quintile 1 (<4.5 servings)                 |     | 9.1% (10)                         |             | 90.9% (100)                        |             | Ref  |               |
| Quintile 2-5                               |     | 7.3% (32)                         |             | 92.7% (404)                        |             | 1.26 | (0.60-2.65)   |
| Education level                            | 534 |                                   |             |                                    |             |      |               |
| Lower                                      |     | 10.4% (25)                        |             | 89.6% (215)                        |             | Ref  |               |
| Third Level                                |     | 5.8% (17)                         |             | 94.2% (277)                        |             | 1.90 | (1.00-3.60)*  |
| Employment                                 | 545 |                                   |             |                                    |             |      |               |
| Not Earning                                |     | 6.4% (15)                         |             | 93.6% (221)                        |             | Ref  |               |
| Employed                                   |     | 9% (22)                           |             | 91.0% (222)                        |             | 0.69 | (0.35-1.36)   |
| Self employed                              |     | 7.7% (5)                          |             | 92.3% (60)                         |             | 0.81 | (0.29-2.33)   |
| Self reported health                       | 546 |                                   |             |                                    |             |      |               |
| Relatively Negative                        |     | 17.1% (27)                        |             | 82.9% (131)                        |             | Ref  |               |
| Relatively Positive                        |     | 3.9% (15)                         |             | 96.1% (373)                        |             | 5.10 | (2.64-9.93)** |
| <b>Paternal Characteristics</b>            |     |                                   |             |                                    |             |      |               |
| BMI at 5-yr follow-up (kg/m <sup>2</sup> ) | 66  | (4)                               |             | (62)                               |             | 0.97 | (0.76-1.23)   |
| Waist Circumference (cm)                   | 65  | (3)                               |             | (62)                               |             | 1.01 | (0.90-1.13)   |
| Height (cm)                                | 66  | (4)                               |             | (62)                               |             | 1.01 | (0.88-1.15)   |
| Smoking at 5-yr follow-up                  | 521 |                                   |             |                                    |             |      |               |
| Smoker                                     |     | 11.5% (16)                        |             | 88.5% (123)                        |             | Ref  |               |
| Non-Smoker                                 |     | 5.5% (21)                         |             | 94.5% (361)                        |             | 2.24 | (1.13-4.42)*  |
| Education level                            | 514 |                                   |             |                                    |             |      |               |
| Lower                                      |     | 11.1% (16)                        |             | 88.9% (128)                        |             | Ref  |               |
| Third Level                                |     | 6.2% (23)                         |             | 93.8% (347)                        |             | 1.89 | (0.97-3.68)^  |
| Employment                                 | 518 |                                   |             |                                    |             |      |               |
| Not Earning                                |     | 9.2% (8)                          |             | 90.8% (79)                         |             | Ref  |               |
| Employed                                   |     | 7.9% (24)                         |             | 92.1% (279)                        |             | 1.18 | (0.51-2.72)   |
| Self employed                              |     | 3.9% (5)                          |             | 96.1% (123)                        |             | 2.49 | (0.79-7.89)†  |
| Self reported health                       | 510 |                                   |             |                                    |             |      |               |
| Relatively Negative                        |     | 12.6% (20)                        |             | 87.4% (139)                        |             | Ref  |               |
| Relatively Positive                        |     | 4.6% (16)                         |             | 95.4% (335)                        |             | 3.01 | (1.52-5.99)** |

\*\*p&lt;0.01, \*p&lt;0.05, ^p&lt;0.1, †p&lt;0.2; Ref=reference category (OR=1)

1  
2  
3 **Table 3** presents the multivariable model for association between qualifying lifecourse  
4 variables and children's relatively-positive PRH at age-5. A significantly strong predictor of  
5 children's relatively-positive PRH was child's not being obese by IOTF classification  
6 [OR(95%CI)=5.5(1.4-21.0)]. When BMI was tested as a continuous variable, there was 0.73  
7 (95%CI=0.58-0.93) times **decreased odds** of the child being positively rated on health status  
8 for every 1 kg/m<sup>2</sup> increase in their BMI. Similarly in the waist circumference model, for  
9 every 1 cm increase there was 0.89 (95%CI=0.81-0.98) times **decreased odds** of the child  
10 getting a relatively-positive rating on health status. **Thus the association between children's**  
11 **BMI or waist circumference and their PRH only strengthened following adjustments in this**  
12 **multivariate model, irrespective of being analysed as a categorical or continuous variable.**  
13 Another significant predictor of children's relatively-positive PRH was mother's having rated  
14 her own health as relatively-positive. These predictors maintained the highest strength of  
15 association with children's health status when independent variables were standardised (**not**  
16 **reported here**). None of the other variables reached the level of statistical significance. The  
17 models explained over 25 percent of variance for children's PRH.  
18  
19  
20  
21  
22  
23  
24  
25  
26  
27  
28  
29  
30  
31  
32  
33  
34  
35  
36  
37  
38  
39  
40  
41  
42  
43  
44  
45  
46  
47  
48  
49  
50  
51  
52  
53  
54  
55  
56  
57  
58  
59  
60

Table 3: Multivariable Logistic Regression model for predictors of children's relatively-positive parent-rated health, PRH (N=303)

|                                                                              | Relatively Positive PRH      |                 | Relatively Positive PRH     |                 | Relatively Positive PRH    |                 |
|------------------------------------------------------------------------------|------------------------------|-----------------|-----------------------------|-----------------|----------------------------|-----------------|
|                                                                              | BMI Categorical <sup>1</sup> |                 | BMI Continuous <sup>2</sup> |                 | WC Continuous <sup>3</sup> |                 |
|                                                                              | OR                           | 95% CI          | OR                          | 95% CI          | OR                         | 95% CI          |
| <b>Child's Individual Characteristics</b>                                    |                              |                 |                             |                 |                            |                 |
| BMI [IOTF], Obese <sup>+</sup> vs Overweight / Normal                        | 5.48                         | (1.43-21.03) *  |                             |                 |                            |                 |
| BMI kg/m <sup>2</sup> [Continuous]                                           |                              |                 | 0.73                        | (0.58-0.93) **  |                            |                 |
| Waist Circumference cm [Continuous]                                          |                              |                 |                             |                 | 0.89                       | (0.81-0.98) *   |
| Fats gm [Quintiles], Q5 <sup>+</sup> vs Q1-4                                 | 1.57                         | (0.42-5.79)     | 1.49                        | (0.40-5.53)     | 1.32                       | (0.36-4.80)     |
| Top <b>food group</b> servings/d [Quintiles], Q5 <sup>+</sup> vs Q1-4        | 1.23                         | (0.33-4.53)     | 1.30                        | (0.36-4.63)     | 1.29                       | (0.36-4.62)     |
| Fruits Veg <b>food group</b> servings/d [Quintiles], Q1 <sup>+</sup> vs Q2-5 | 2.57                         | (0.75-8.80)     | 2.86                        | (0.83-9.93)     | 2.73                       | (0.78-9.49)     |
| <b>Family Characteristics</b>                                                |                              |                 |                             |                 |                            |                 |
| Household Weekly Income, Less <sup>+</sup> vs High                           | 1.85                         | (0.63-5.40)     | 1.76                        | (0.59-5.21)     | 1.79                       | (0.61-5.26)     |
| Entitlement to General Medical, Card Yes <sup>+</sup> vs No                  | 0.94                         | (0.24-3.71)     | 1.03                        | (0.26-4.07)     | 1.04                       | (0.26-4.10)     |
| Fathers' Participation, Not <sup>+</sup> vs Yes                              | 1.88                         | (0.68-5.21)     | 1.86                        | (0.67-5.16)     | 2.06                       | (0.74-5.71)     |
| Support from Spouse/Partner, Less <sup>+</sup> vs More                       | 0.70                         | (0.20-2.49)     | 0.67                        | (0.19-2.33)     | 0.74                       | (0.22-2.52)     |
| Support from Parents, Less <sup>+</sup> vs More                              | 1.92                         | (0.53-6.93)     | 2.33                        | (0.64-8.42)     | 2.37                       | (0.66-8.53)     |
| Support from Children, Less <sup>+</sup> vs More                             | 1.15                         | (0.38-3.45)     | 1.29                        | (0.42-3.91)     | 1.25                       | (0.41-3.82)     |
| Support from Close Relatives, Less <sup>+</sup> vs More                      | 0.86                         | (0.23-3.13)     | 0.84                        | (0.24-3.02)     | 0.84                       | (0.23-3.01)     |
| <b>Maternal Characteristics</b>                                              |                              |                 |                             |                 |                            |                 |
| Energy Kcal [Quintiles], Q5 <sup>+</sup> vs Q1-4                             | 1.89                         | (0.30-11.84)    | 2.00                        | (0.31-12.86)    | 1.57                       | (0.28-8.84)     |
| Fats gm [Quintiles], Q5 <sup>+</sup> vs Q1-4                                 | 0.72                         | (0.09-5.54)     | 0.59                        | (0.07-4.77)     | 0.92                       | (0.13-6.41)     |
| Top <b>food group</b> servings/d [Quintiles], Q5 <sup>+</sup> vs Q1-4        | 1.08                         | (0.29-3.94)     | 1.30                        | (0.36-4.65)     | 1.18                       | (0.32-4.34)     |
| Education, Lower <sup>+</sup> vs Third level                                 | 1.34                         | (0.47-3.78)     | 1.35                        | (0.48-3.80)     | 1.48                       | (0.53-4.13)     |
| Self reported health status, Rel.Negative <sup>+</sup> vs Rel.Positive       | 4.20                         | (1.45-12.20) ** | 4.42                        | (1.53-12.79) ** | 4.17                       | (1.47-11.87) ** |
| <b>Paternal Characteristics</b>                                              |                              |                 |                             |                 |                            |                 |
| Current Smoking status, Yes <sup>+</sup> vs No                               | 1.37                         | (0.48-3.93)     | 1.31                        | (0.45-3.83)     | 1.53                       | (0.54-4.35)     |
| Education, Lower <sup>+</sup> vs Third level                                 | 0.69                         | (0.21-2.28)     | 0.79                        | (0.24-2.57)     | 0.83                       | (0.26-2.67)     |
| Employment, Non-earning <sup>+</sup> vs Self employed                        | 1.60                         | (0.73-3.53)     | 1.52                        | (0.69-3.32)     | 1.57                       | (0.70-3.53)     |
| Self reported health status, Rel.Negative <sup>+</sup> vs Rel.Positive       | 1.48                         | (0.52-4.20)     | 1.54                        | (0.54-4.35)     | 1.43                       | (0.51-3.96)     |

OR=Odds Ratio; <sup>+</sup>Reference category (OR=1); \*\*p<0.01 (2-tailed), \*p<0.05 (2-tailed)

Rel.Negative=Relatively Negative, Rel.Positive=Relatively Positive

<sup>1</sup>Child BMI as a categorical variable; Model Chi-sq = 34.2, df = 21, p = 0.034; -2LL = 128.6, Nagelkerke R-sq = 0.26

<sup>2</sup>Child BMI as a continuous variable; Model Chi-sq = 35.9, df = 21, p = 0.022; -2LL = 126.9, Nagelkerke R-sq = 0.27

<sup>3</sup>Child waist circumference as a continuous variable; Model Chi-sq = 33.8, df = 21, p = 0.038; -2LL = 128.9, Nagelkerke R-sq = 0.25

## Discussion

This analysis showed that determinants from both child's individual and family spheres have an influence on child's health at preschool-age. The factors from all three material, psycho-social and lifestyle domains, the major explanations for child health inequalities,<sup>[8]</sup> were associated at uni-variate levels. However, in the final model this analysis clearly demonstrated a negative association between child's obesity and health status. Child's not being obese was one of the significantly strong predictors of child's relatively-positive health status, which was also observed with measured BMI and waist circumference analysed as continuous variables.

This negative relationship observed between measured obesity and PRH conforms to published literature on primary school age-group children and adolescents.<sup>[43-45]</sup> Most importantly, for the first time to our knowledge, this analysis demonstrates the association having adjusted for food and nutrient intake, along-with a wide range of other explanatory variables.

Self-rated health is an important and valid measure of morbidity, mortality, longevity and health status,<sup>[3,4]</sup> also in Irish adult<sup>[46,47]</sup> and children.<sup>[16]</sup> It is believed to be a more inclusive measure of health than the objective measurements, with a capacity to comprehensively evaluate health dynamics, behaviours and psycho-physiological states that are not otherwise easy to measure.<sup>[3]</sup> This holistic measure better accommodates the WHO defined concept of health as opposed to a diagnosed specific disease.<sup>[3]</sup> Use of parent proxy for child self-reported health is justified for children too young to have adequate cognitive skills.<sup>[48,49]</sup> Systematic reviews report good agreement between ratings by children and their parents on child HRQoL, particularly for physical health domain.<sup>[48-50]</sup> Parents tend to be thoughtful when responding to proxy questions and report children's usual health disposition.<sup>[51]</sup> Studies on construct validity report positively.<sup>[52-55]</sup> Maternal ratings of child's general health status were found sensitive when validated against children's illnesses and other morbidity or healthcare indicators,<sup>[41,56-58]</sup> including evidence of a gradient in strength of these associations.<sup>[41]</sup> Many national-level studies have accepted parent proxy as an

1  
2  
3 appropriate measure<sup>[17,18,59,60]</sup> and successfully used it to longitudinally demonstrate risk and  
4  
5 consequences of child health.<sup>[17,59]</sup>  
6

7  
8 Self-rated health, a composite measure, represents all domains of HR-QoL,<sup>[4]</sup> but better represents  
9  
10 physical health than HR-QoL.<sup>[61]</sup> Studies on older age-group children have reported stronger/sole  
11  
12 negative associations for general/physical health domain of HR-QoL and obesity,<sup>[44,62]</sup> irrespective  
13  
14 whether children themselves or parents reported their HRQoL,<sup>[29]</sup> and also whether BMI was  
15  
16 analysed as a categorical,<sup>[43,44]</sup> or continuous variable.<sup>[63,64]</sup>  
17

18  
19 Another relevance of this analysis is in demonstrating this association of obesity with general-  
20  
21 health in a nationally representative sample of preschool-age children, for which literature is scant.  
22  
23 Though, a few have shown similar association of obesity with specific paediatric conditions or  
24  
25 admission history in this age-group.<sup>[30,31,65-68]</sup> A longitudinal study speculated that pre-school  
26  
27 obesity influences a decline in early-age health, and then both obesity and poor-health tracks into  
28  
29 adolescence.<sup>[69]</sup> The WHO recommends high priority for determinants of health inequalities during  
30  
31 early development.<sup>[70]</sup>  
32  
33

34  
35 The Lifeways previously demonstrated longitudinal association between parental socio-economic  
36  
37 and lifestyle characteristics and child's BMI and waist circumference.<sup>[36]</sup> In this analysis when  
38  
39 same anthropometric measures are included along-with material, psycho-social, and lifestyle  
40  
41 determinants of child obesity and health, a prominent relationship emerges between children's  
42  
43 anthropometric measures and health status. One possible explanation is that determinants of health  
44  
45 inequalities biologically embed<sup>[21,22]</sup> in early life and child obesity is an early phenotypic  
46  
47 expression of this inequality; though the continued influence of environmental factors is not  
48  
49 undermined. Adult<sup>[25,26]</sup> and adolescence studies<sup>[44,45]</sup> have also shown this association to be  
50  
51 independent of socio-demographic, lifestyle or health-related factors.  
52  
53  
54

55  
56 The observed association between BMI or waist circumference and PRH in the present analysis  
57  
58  
59  
60

1  
2  
3 may be temporal, as demonstrated in adults.<sup>[27,28]</sup> Though a number of large scale cross sectional  
4  
5 studies have shown an association between anthropometric measures of obesity and self rated  
6  
7 health,<sup>[71]</sup> only recently a few nationally representative prospective studies have established the  
8  
9 temporality of this association in adults.<sup>[27,28]</sup> Though this relationship maybe bi-directional to an  
10  
11 extent,<sup>[72,73]</sup> the mounting evidence from longitudinal birth cohort studies regarding a sequential  
12  
13 relationship between lifetime growth trajectories and adult disease, disability and deaths<sup>[2]</sup>  
14  
15 primarily rules out reverse causality in this association and suggests that the association observed  
16  
17 in our birth cohort is also more likely to be temporal. Moreover, the available findings from a few  
18  
19 longitudinal studies on primary school age children suggest that at least in the childhood this  
20  
21 inverse association found between BMI and HRQoL is predominantly in the given direction and  
22  
23 not the reverse.<sup>[74,75]</sup> However, this needs careful interpretation as both anthropometric and health  
24  
25 data were concurrently collected, and this limitation may be addressed with next sweep of cohort  
26  
27 data collection.  
28  
29  
30

31  
32 This analysis demonstrated that maternal health was strongly predictive of her child's health. One  
33  
34 concern is that mother's perception of her own health may bias her perception of her child's  
35  
36 health. However, this intergenerational association has been previously reported,<sup>[41,56,57,76-79]</sup> and  
37  
38 reporting mothers can effectively discriminate between their own and children's  
39  
40 health.<sup>[41,56,57,77,78,80]</sup> Several mechanisms such as inherited susceptibility, uterine environment and  
41  
42 shared environment have been suggested for this familial aggregation pattern.<sup>[56,77,78]</sup>  
43  
44  
45

46  
47 Maternal BMI may be related to both maternal self-rated health and child's BMI, so the observed  
48  
49 associations in this analysis could possibly be a reflection of an association between maternal BMI  
50  
51 and child's PRH. However, this was not observed in our analysis. Maternal BMI at both pre-  
52  
53 pregnancy and 5-year follow-up were not associated with child's PRH at univariate level. Also,  
54  
55 when maternal BMI was forcibly added into the multivariable model (not reported here), the  
56  
57 observed associations did not attenuate.  
58  
59  
60



1  
2  
3 The study has limitations in use of reported rather than measured health status and a relatively  
4 small sample size. Though the study was able to detect the major explanatory domains for child  
5 health inequalities documented in the literature<sup>[8]</sup>, the relatively small sample size of this study  
6 may possibly have underpowered it to detect variables with lesser effect sizes. The complete case  
7 approach to analysis reduced the sample size of the final multivariate model. However, this  
8 missing data was not systematic but rather on account of accumulation of missing completely at  
9 random data across a number of variables. It may be argued that the reduced sample size possibly  
10 influenced the odds ratio estimate for the association between children's relatively-positive PRH  
11 and the child's not being obese (using a categorical IOTF classification). Nonetheless this  
12 association between children's anthropometric measures and their parent-rated health variable is  
13 likely to be coherent, because these associations remain statistically significant even when BMI  
14 and WC are analysed as continuous variables.

15  
16  
17  
18  
19  
20  
21  
22  
23  
24  
25  
26  
27  
28  
29  
30 As in most birth cohort studies,<sup>[81,82]</sup> the Lifeways birth cohort also experienced the attrition of  
31 mothers belonging to lower socio-economic status in the early stages of the study. Though this  
32 may underestimate some socioeconomic inequalities<sup>[83]</sup>, it does not negate the exposure-outcome  
33 associations detected through regression models of such longitudinal studies<sup>[84,85]</sup>.

34  
35  
36  
37  
38  
39  
40  
41  
42  
43  
44  
45  
46  
47  
48  
49  
50  
51  
52  
53  
54  
55  
56  
57  
58  
59  
60  
Nevertheless, this study has advantages in use of lifecourse variables from pre-conception to age  
of 5-years, with measured BMI and waist circumference data. It also has detailed foods and  
nutrient data along-with other socio-economic, psycho-social and lifestyle variables for child and  
both parents.

In conclusion, these analyses from the Lifeways cohort show that lifecourse adversities were  
associated with mother-reported health for preschoolers, suggesting an early life influence.  
Preschoolers' BMI and waist-circumference demonstrated strong negative associations with  
mother-reported health independent of socio-economic, psycho-social, and lifestyle factors,  
suggesting early biological expression of lifecourse adversities. The findings have important

1  
2  
3  
4  
5  
6  
7  
8  
9  
10  
11  
12  
13  
14  
15  
16  
17  
18  
19  
20  
21  
22  
23  
24  
25  
26  
27  
28  
29  
30  
31  
32  
33  
34  
35  
36  
37  
38  
39  
40  
41  
42  
43  
44  
45  
46  
47  
48  
49  
50  
51  
52  
53  
54  
55  
56  
57  
58  
59  
60

implications in understanding how early life environment may create inequalities in developmental health.

For peer review only

## Footnotes

## Acknowledgements

The Lifeways Cross-Generation Cohort Study is overseen by an interdisciplinary scientific steering group chaired by CCK, the principal investigator. The authors greatly appreciate the participation of the Lifeways cohort families.

## Contributors

AS undertook all analyses reported in this manuscript, interpreted the findings and drafted the manuscript. CM contributed to data collection at five year follow-up, interpretation of the analysis and critical revision of the manuscript. CCK designed the study, supervised the analyses, interpretation of results and intellectual content of the manuscript. All three authors approved the final version.

## Funding

The Lifeways Cross-Generation Cohort Study was established as part of European Science Foundation funded 'Social Variations in Health Expectancy in Europe' international research programme and its various sweeps have been funded by the Health Research Board of Ireland. Funding sources had no involvement in design, collection, analysis, interpretation, writing and submission of this manuscript.

## Competing interests

None

### **Ethical approvals**

Ethics committees of Coombe University Hospital, Dublin, University College Hospital Galway, University College Dublin, Dublin, and the Irish College of General Practitioners, Ireland.

### **Data sharing statement**

There are no additional data available. The data manager may be contacted at john.obrien@ucd.ie for more details on the Lifeways Cross-Generation Cohort Study.

### **Appendices**

The web only supplement includes eTable 1 regarding details of examined variables and eTable 2 displaying standardised odds ratios for multivariable logistic regression model.

## REFERENCES

1. Barker DJ. Sir Richard Doll Lecture. Developmental origins of chronic disease. *Public Health* 2012;**126**(3):185-9.
2. Power CI, Kuh D, Morton S. From developmental origins of adult disease to life course research on adult disease and aging: insights from birth cohort studies. *Annu Rev Public Health*. 2013;**34**:7-28.
3. Benyamini Y. Self-ratings of health and longevity: a health psychologist's viewpoint on epidemiological findings. *The European Health Psychologist* 2008;**10**:10–13.
4. Bjorner J, Fayers P, Idler E. Self-rated health. In: Fayers PM, Hays RD, eds. *Assessing quality of life in clinical trials: methods and practice*. 2nd edn. New York: Oxford University Press, 2005:309-24.
5. Bronfenbrenner U. Ecological models of human development. In: Postlethwaite TN, Husen T, eds. *International Encyclopedia of Education*. Vol 3. 2nd ed. Oxford, England: Elsevier Sciences, Ltd., 1994: 1643-47.
6. Siddiqi A, Irwin LG, Hertzman C. Total environment assessment model for early child development. Evidence report for the WHO commission on social determinants of health. World Health Organization, 2007.  
[http://www.who.int/social\\_determinants/resources/ecd\\_kn\\_evidence\\_report\\_2007.pdf](http://www.who.int/social_determinants/resources/ecd_kn_evidence_report_2007.pdf)  
(accessed March 30, 2012).

- 1  
2  
3 7. Maggi S, Irwin LJ, Siddiqi A, *et al.* The social determinants of early child development: an  
4  
5 overview. *J Paediatr Child Health* 2010;**46**(11):627-35.  
6  
7
- 8  
9  
10 8. Hertzman C, Li J, Mattes E, *et al.* Social determinants of child health and well-being  
11  
12 [Editorial]. *Health Sociology Review* 2009;**18**(1):3-11.  
13
- 14  
15  
16 9. Ben-Shlomo Y, Kuh D. A life course approach to chronic disease epidemiology:  
17  
18 conceptual models, empirical challenges and interdisciplinary perspectives. *Int J Epidemiol*  
19  
20 2002;**31**(2):285-93.  
21  
22
- 23  
24  
25 10. Halfon N, Hochstein M. Life course health development: an integrated framework for  
26  
27 developing health, policy, and research. *Milbank Q* 2002; **80**(3):433-79, iii.  
28  
29
- 30  
31  
32 11. Graham H, and Power Chris. *Childhood disadvantage and adult health: a lifecourse*  
33  
34 *framework*. London: NHS Health Development Agency, 2004.  
35  
36 [http://www.gserve.nice.org.uk/niceMedia/pdf/childhood\\_disadvantage\\_health.pdf](http://www.gserve.nice.org.uk/niceMedia/pdf/childhood_disadvantage_health.pdf)  
37  
38 (accessed May 24, 2014).  
39  
40
- 41  
42  
43 12. Hertzman C, Power C, Matthews S, *et al.* Using an interactive framework of society and  
44  
45 lifecourse to explain self-rated health in early adulthood. *Soc Sci Med* 2001;**53**(12):1575-  
46  
47 85.  
48  
49
- 50  
51  
52 13. Mensah FK, Hobcraft J. Childhood deprivation, health and development: associations with  
53  
54 adult health in the 1958 and 1970 British prospective birth cohort studies. *J Epidemiol*  
55  
56 *Community Health* 2008;**62**(7):599-606.  
57  
58  
59  
60

- 1  
2  
3  
4  
5 14. Kestila L, Koskinen S, Martelin T, *et al*. Determinants of health in early adulthood: what is  
6 the role of parental education, childhood adversities and own education ? *Eur J Public*  
7  
8 *Health* 2006;**16**(3):305-14.  
9  
10  
11  
12  
13  
14 15. Pollitt R, Rose K, Kaufman J. Evaluating the evidence for models of life course  
15 socioeconomic factors and cardiovascular outcomes: a systematic review. *BMC Public*  
16 *Health* 2005;**5**(1):7.  
17  
18  
19  
20  
21  
22  
23 16. Kelleher CC, Tay J, Gabhainn SN. Influence on self-rated health of socio-demographic,  
24 lifestyle and affluence factors: an analysis of the Irish and international health behaviours  
25 among school-aged children (HBSC) datasets 1998. *Ir Med J* 2007;**100**(8):suppl 43-6.  
26  
27  
28  
29  
30  
31  
32 17. Stein RE, Siegel MJ, Bauman LJ. Double jeopardy: what social risk adds to biomedical  
33 risk in understanding child health and health care utilization. *Acad Pediatr* 2010;**10**(3):165-  
34 71.  
35  
36  
37  
38  
39  
40  
41 18. Stevens GD. Gradients in the health status and developmental risks of young children: the  
42 combined influences of multiple social risk factors. *Matern Child Health J* 2006;**10**(2):187-  
43 99.  
44  
45  
46  
47  
48  
49  
50 19. Krieger N. Theories for social epidemiology in the 21st century: an ecosocial perspective.  
51 *Int J Epidemiol* 2001;**30**(4):668-77.  
52  
53  
54  
55  
56  
57  
58  
59  
60

- 1  
2  
3 20. Krieger N. A glossary for social epidemiology. *J Epidemiol Community Health*  
4 2001;**55**(10):693-700.  
5  
6  
7  
8  
9  
10 21. Hertzman C. The biological embedding of early experience and its effects on health in  
11 adulthood. *Ann N Y Acad Sci* 1999;**896**(1):85-95.  
12  
13  
14  
15  
16 22. Hertzman C, Boyce T. How experience gets under the skin to create gradients in  
17 developmental health. *Annu Rev Public Health* 2010;**31**:329-47 C1-C3.  
18  
19  
20  
21  
22  
23 23. Butland B, Jebb S, Kopelman P, *et al.* Foresight. Tackling obesities: future choices —  
24 Project report. London: Government Office for Science, 2007.  
25  
26  
27 <http://www.bis.gov.uk/assets/foresight/docs/obesity/17.pdf> (accessed March 30, 2012).  
28  
29  
30  
31  
32 24. Aboderin I, Kalache A, Ben-Shlomo Y, *et al.* Life course perspectives on coronary heart  
33 disease, stroke and diabetes: key issues and implications for policy and research. Geneva:  
34 World Health Organization, 2002.  
35  
36  
37 [http://whqlibdoc.who.int/hq/2002/WHO\\_NMH\\_NPH\\_02.1.pdf](http://whqlibdoc.who.int/hq/2002/WHO_NMH_NPH_02.1.pdf) (accessed March 30, 2012).  
38  
39  
40  
41  
42  
43 25. Molarius A, Berglund K, Eriksson C, *et al.* Socioeconomic conditions, lifestyle factors, and  
44 self-rated health among men and women in Sweden. *Eur J Public Health* 2007;**17**(2):125-  
45 33.  
46  
47  
48  
49  
50  
51  
52 26. Prosper M-H, Moczulski VL, Qureshi A. Obesity as a predictor of self-rated health. *Am J*  
53 *Health Behav* 2009;**33**(3):319-29.  
54  
55  
56  
57  
58  
59  
60



- 1  
2  
3 27. Svedberg P, Bardage C, Sandin S, *et al.* A prospective study of health, life-style and  
4 psychosocial predictors of self-rated health. *Eur J Epidemiol* 2006;**21**(10):767-76.  
5  
6  
7  
8  
9  
10 28. Zajacova A, Burgard SA. Body weight and health from early to mid-adulthood: a  
11 longitudinal analysis. *J Health Soc Behav* 2010;**51**(1):92-107.  
12  
13  
14  
15  
16 29. Tsiros MD, Olds T, Buckley JD, *et al.* Health-related quality of life in obese children and  
17 adolescents. *Int J Obes (Lond)* 2009;**33**(4):387-400.  
18  
19  
20  
21  
22  
23 30. Wake M, Hardy P, Sawyer MG, *et al.* Comorbidities of overweight/obesity in Australian  
24 preschoolers: a cross-sectional population study. *Arch Dis Child* 2008;**93**(6):502-07.  
25  
26  
27  
28  
29  
30 31. Skinner AC, Perrin EM, Steiner MJ. Healthy for now? A cross-sectional study of the  
31 comorbidities in obese preschool children in the United States. *Clin Pediatr (Phila)*  
32 2010;**49**(7):648-55.  
33  
34  
35  
36  
37  
38 32. O'Mahony D, Fallon UB, Hannon F, *et al.* The Lifeways Cross-Generation Study: design,  
39 recruitment and data management considerations. *Ir Med J* 2007;**100**(8):suppl 3-6.  
40  
41  
42  
43  
44  
45 33. Niedhammer I, O'Mahony D, Daly S, *et al.* Occupational predictors of pregnancy outcomes  
46 in Irish working women in the Lifeways cohort. *BJOG* 2009;**116**(7):943-52.  
47  
48  
49  
50  
51  
52 34. Murrin CM, Kelly GE, Tremblay RE, *et al.* Body mass index and height over three  
53 generations: evidence from the Lifeways Cross-Generational Cohort Study. *BMC Public*  
54 *Health* 2012;**12**:81.  
55  
56  
57  
58  
59  
60

- 1  
2  
3  
4  
5 35. National Nutrition Surveillance Centre. Dietary habits of the Irish population: results from  
6  
7 SLÁN, Annual Report 2003. Dublin: National Nutritional Surveillance Centre, Department  
8  
9 of Public Health Medicine and Epidemiology, University College Dublin, Dublin and  
10  
11 Health Promotion Unit, Department of Health and Children, Dublin, 2003.  
12  
13  
14  
15  
16 36. Murrin C. Maternal factors during pregnancy contributing to early life risk of childhood  
17  
18 obesity [PhD Thesis]. Dublin: University College Dublin, 2011.  
19  
20  
21  
22  
23 37. Harrington J. Validation of a food frequency questionnaire as a tool for assessing nutrient  
24  
25 intake [MA Thesis]. Galway: National University of Ireland, 1997.  
26  
27  
28  
29  
30 38. Gregory J, Collins D, Davies P, *et al.* National Diet and Nutrition Survey: children aged  
31  
32 1.5 - 4.5 years. Volume 1: Report of the diet and nutrition survey. London: HMSO, 1995.  
33  
34  
35  
36 39. Food Standards Agency. McCance and Widdowson's The composition of foods, sixth  
37  
38 summary edition. Cambridge: Royal Society of Chemistry, 2002.  
39  
40  
41  
42  
43 40. FFQ\_Software version 1.0. Dublin: National Nutrition Surveillance Centre, School of  
44  
45 Public Health and Population Science, University College Dublin, 2007.  
46  
47  
48  
49 41. Monette S, Séguin L, Gauvin L, *et al.* Validation of a measure of maternal perception of  
50  
51 the child's health status. *Child Care Health Dev* 2007;**33**(4):472-81.  
52  
53  
54  
55  
56  
57  
58  
59  
60

- 1  
2  
3  
4  
5  
6  
7  
8  
9  
10  
11  
12  
13  
14  
15  
16  
17  
18  
19  
20  
21  
22  
23  
24  
25  
26  
27  
28  
29  
30  
31  
32  
33  
34  
35  
36  
37  
38  
39  
40  
41  
42  
43  
44  
45  
46  
47  
48  
49  
50  
51  
52  
53  
54  
55  
56  
57  
58  
59  
60
42. Katz MH. *Multivariable analysis: a practical guide for clinicians and public health researchers*. 3rd ed. New York: Cambridge University Press, 2011.
43. Wake M, Salmon L, Waters E, *et al*. Parent-reported health status of overweight and obese Australian primary school children: a cross-sectional population survey. *Int J Obes Relat Metab Disord* 2002;**26**(5): 717-24.
44. Swallen KC, Reither EN, Haas SA, *et al*. Overweight, obesity, and health-related quality of life among adolescents: the National Longitudinal Study of Adolescent Health. *Pediatrics* 2005;**115**(2):340-47.
45. Vingilis ER, Wade TJ, Seeley JS. Predictors of adolescent self-rated health. Analysis of the National Population Health Survey. *Can J Public Health* 2002;**93**(3):193-97.
46. Kelleher CC, Whelan J, Daly L, *et al*. Socio-demographic, environmental, lifestyle and psychosocial factors predict self rated health in Irish Travellers, a minority nomadic population. *Health Place* 2012;**18**(2):330-38.
47. Kelleher CC, Friel S, Nic Gabhainn S, *et al*. Socio-demographic predictors of self-rated health in the Republic of Ireland: findings from the National Survey on Lifestyle, Attitudes and Nutrition, SLAN. *Soc Sci Med* 2003;**57**(3):477-86.
48. Eiser C, Morse R. Can parents rate their child's health-related quality of life? Results of a systematic review. *Qual Life Res* 2001;**10**(4):347-57.

- 1  
2  
3 49. Upton P, Lawford J, Eiser C. Parent-child agreement across child health-related quality of  
4  
5 life instruments: a review of the literature. *Qual Life Res* 2008;**17**(6):895-913.  
6  
7  
8  
9  
10 50. Norrby U, Nordholm L, Fasth A. Reliability and validity of the swedish version of child  
11 health questionnaire. *Scand J Rheumatol* 2003;**32**(2):101-7.  
12  
13  
14  
15  
16 51. Davis E, Nicolas C, Waters E, *et al*. Parent-proxy and child self-reported health-related  
17 quality of life: using qualitative methods to explain the discordance. *Qual Life Res*  
18 2007;**16**(5):863-71.  
19  
20  
21  
22  
23  
24  
25 52. Theunissen NC, Vogels TG, Koopman HM, *et al*. The proxy problem: child report versus  
26 parent report in health-related quality of life research. *Qual Life Res* 1998;**7**(5):387-97.  
27  
28  
29  
30  
31  
32 53. Varni JW, Limbers CA, Burwinkle TM. Parent proxy-report of their children's health-  
33 related quality of life: an analysis of 13,878 parents' reliability and validity across age  
34 subgroups using the PedsQL 4.0 Generic Core Scales. *Health Qual Life Outcomes*  
35 2007;**5**:2.  
36  
37  
38  
39  
40  
41  
42  
43 54. Spencer NJ, Coe C. The development and validation of a measure of parent-reported child  
44 health and morbidity: the Warwick Child Health and Morbidity Profile. *Child Care Health*  
45 *Dev* 1996;**22**(6):367-79.  
46  
47  
48  
49  
50  
51  
52 55. Spencer NJ, Coe C. Validation of the Warwick Child Health and Morbidity Profile in  
53 routine child health surveillance. *Child Care Health Dev* 2000;**26**(4):323-36.  
54  
55  
56  
57  
58  
59  
60

- 1  
2  
3 56. McCormick MC, Brooks-Gunn J, Workman-Daniels K, *et al.* Maternal rating of child  
4 health at school age: does the vulnerable child syndrome persist ? *Pediatrics*  
5 1993;**92**(3):380-88.  
6  
7  
8  
9  
10  
11 57. McCormick MC, Brooks-Gunn J, Shorter T, *et al.* Factors associated with maternal rating  
12 of infant health in central Harlem. *J Dev Behav Pediatr* 1989;**10**(3):139-44.  
13  
14  
15  
16  
17  
18 58. McCormick MC, Athreya BH, Bernbaum JC, *et al.* Preliminary observations on maternal  
19 rating of health of children: data from three subspecialty clinics. *J Clin Epidemiol*  
20 1988;**41**(4):323-29.  
21  
22  
23  
24  
25  
26  
27 59. Lynch JL. Infant health, race/ethnicity, and early educational outcomes using the ECLS-B.  
28 *Sociol Inq* 2011;**81**(4):499-526.  
29  
30  
31  
32  
33  
34 60. Gilman SE, McCormick MC. Insights from life course epidemiology. *Acad Pediatr*  
35 2010;**10**(3):159-60.  
36  
37  
38  
39  
40  
41 61. Smith KW, Avis NE, Assmann SF. Distinguishing between quality of life and health status  
42 in quality of life research: a meta-analysis. *Qual Life Res* 1999;**8**(5):447-59.  
43  
44  
45  
46  
47 62. Pinhas-Hamiel O, Singer S, Pilpel N, *et al.* Health-related quality of life among children  
48 and adolescents: associations with obesity. *Int J Obes (Lond)* 2006;**30**(2):267-72.  
49  
50  
51  
52  
53  
54 63. Williams J, Wake M, Hesketh K, *et al.* Health-related quality of life of overweight and  
55 obese children. *JAMA* 2005;**293**(1):70-6.  
56  
57  
58  
59  
60

- 1  
2  
3  
4  
5 64. de Beer M, Hofsteenge GH, Koot HM, *et al.* Health-related-quality-of-life in obese  
6 adolescents is decreased and inversely related to BMI. *Acta Paediatr* 2007;**96**(5):710-14.  
7  
8  
9  
10  
11 65. Shibli R, Rubin L, Akons H, *et al.* Morbidity of overweight ( $\geq 85$ th percentile) in the first 2  
12 years of life. *Pediatrics* 2008;**122**(2):267-72.  
13  
14  
15  
16  
17 66. Suglia SF, Chambers EC, Rosario A, *et al.* Asthma and obesity in three-year-old urban  
18 children: role of sex and home environment. *J Pediatr* 2011;**159**(1):14-20.e11.  
19  
20  
21  
22  
23 67. Tai A, Volkmer R, Burton A. Association between asthma symptoms and obesity in  
24 preschool (4-5 year old) children. *J Asthma* 2009;**46**(4):362-65.  
25  
26  
27  
28  
29  
30  
31 68. Slining M, Adair LS, Goldman BD, *et al.* Infant overweight is associated with delayed  
32 motor development. *J Pediatr* 2010;**157**(1):20-5.e21.  
33  
34  
35  
36  
37 69. Williams JW, Canterford L, Hesketh KD, *et al.* Changes in body mass index and health  
38 related quality of life from childhood to adolescence. *Int J Pediatr Obes* 2011;**6**(2-2):e442-  
39 e448.  
40  
41  
42  
43  
44  
45  
46  
47 70. Marmot M, Friel S, Bell R, *et al.* Closing the gap in a generation: health equity through  
48 action on the social determinants of health. *Lancet* 2008;**372**(9650):1661-69.  
49  
50  
51  
52  
53 71. Imai K, Gregg EW, Chen YJ, Zhang P, *et al.* The association of BMI with functional status  
54 and self-rated health in US adults. *Obesity (Silver Spring)* 2008;**16**(2):402-8.  
55  
56  
57  
58  
59  
60

- 1  
2  
3  
4  
5 72. Simonsen MK, Hundrup YA, Grønbaek M, *et al.* A prospective study of the association  
6 between weight changes and self-rated health. *BMC Womens Health* 2008;**8**:13.  
7  
8  
9  
10  
11  
12 73. Cameron AJ, Magliano DJ, Dunstan DW, *et al.* A bi-directional relationship between  
13 obesity and health-related quality of life: evidence from the longitudinal AusDiab study. *Int*  
14 *J Obes (Lond)* 2012;**36**(2):295-303.  
15  
16  
17  
18  
19  
20  
21 74. Sawyer MG, Harchak T, Wake M, *et al.* Four-year prospective study of BMI and mental  
22 health problems in young children. *Pediatrics* 2011;**128**(4):677-84.  
23  
24  
25  
26  
27  
28 75. Jansen PW, Mensah FK, Clifford S, *et al.* Bidirectional associations between overweight  
29 and health-related quality of life from 4-11 years: Longitudinal Study of Australian  
30 Children. *Int J Obes (Lond)* 2013;**37**(10):1307-13.  
31  
32  
33  
34  
35  
36 76. Coneus K, Spiess CK. The intergenerational transmission of health in early childhood -  
37 evidence from the German Socio-Economic Panel Study. *Econ Hum Biol* 2012;**10**(1):89-  
38 97.  
39  
40  
41  
42  
43  
44  
45 77. Case A, Lubotsky D, Paxson C. Economic status and health in childhood: the origins of the  
46 gradient. *Am Econ Rev* 2002;**92**(5):1308-34.  
47  
48  
49  
50  
51  
52 78. Silburn SR, Zubrick SR, Garton A, *et al.* Western Australia Child Health Survey: family  
53 and community health. Perth, Western Australia: Australian Bureau of Statistics and the  
54 TVW Telethon Institute for Child Health Research, 1996.  
55  
56  
57  
58  
59  
60

- 1  
2  
3  
4  
5 79. Waters E, Doyle J, Wolfe R, *et al.* Influence of parental gender and self-reported health and  
6 illness on parent-reported child health. *Pediatrics* 2000;**106**(6):1422-28.  
7  
8  
9  
10  
11  
12 80. Dadds MR, Stein RE, Silver EJ. The role of maternal psychological adjustment in the  
13 measurement of children's functional status. *J Pediatr Psychol* 1995;**20**(4):527-44.  
14  
15  
16  
17  
18 81. Boyd A, Golding J, Macleod J, *et al.* Cohort Profile: the 'children of the 90s'--the index  
19 offspring of the Avon Longitudinal Study of Parents and Children. *Int J Epidemiol*  
20 2013;**42**(1):111-27.  
21  
22  
23  
24  
25  
26  
27 82. Fraser A, Macdonald-Wallis C, Tilling K, *et al.* Cohort Profile: the Avon Longitudinal  
28 Study of Parents and Children: ALSPAC mothers cohort. *Int J Epidemiol* 2013;**42**(1):97-  
29 110.  
30  
31  
32  
33  
34  
35  
36 83. Howe L, Galobardes B, Tilling K, *et al.* Does drop-out from cohort studies bias estimates  
37 of socioeconomic inequalities in health? *J Epidemiol Community Health* 2011;**65**:A31.  
38  
39  
40  
41  
42  
43 84. Wolke D, Waylen A, Samara M, *et al.* Selective drop-out in longitudinal studies and non-  
44 biased prediction of behaviour disorders. *Br J Psychiatry* 2009;**195**(3):249-56.  
45  
46  
47  
48  
49 85. Nilsen RM, Vollset SE, Gjessing HK, *et al.* Self-selection and bias in a large prospective  
50 pregnancy cohort in Norway. *Paediatr Perinat Epidemiol* 2009;**23**(6):597-608.  
51  
52  
53  
54  
55  
56  
57  
58  
59  
60



**LICENCE FOR PUBLICATION STATEMENT**

The Corresponding Author has the right to grant on behalf of all authors and does grant on behalf of all authors, an exclusive licence (or non-exclusive for government employees) on a worldwide basis to the BMJ Group and co-owners or contracting owning societies (where published by the BMJ Group on their behalf), and its Licensees to permit this article (if accepted) to be published in any BMJ Group products and to exploit all subsidiary rights, as set out in our licence.

For peer review only

eTable 1: Lifecourse variables examined for relationship with children's parent-rated health, PRH

| Independent Variables                                                                                      | Time                       | Categories                                                                                                            |
|------------------------------------------------------------------------------------------------------------|----------------------------|-----------------------------------------------------------------------------------------------------------------------|
| <b>Child's Individual characteristics</b>                                                                  |                            |                                                                                                                       |
| <b><i>Demographic and Anthropometric</i></b>                                                               |                            |                                                                                                                       |
| Birth-weight standardised for gestational age (g)                                                          | Measured at birth          | continuous measure                                                                                                    |
| Age at 5-year follow-up (years)                                                                            | At 5-yr follow-up          | continuous measure                                                                                                    |
| Gender                                                                                                     |                            | Male, Female                                                                                                          |
| Body Mass Index (BMI) kg/m <sup>2</sup>                                                                    | Measured at 5-yr follow-up | continuous measure<br>Also as obese versus overweight or normal using IOTF definitions                                |
| Waist Circumference (cm)                                                                                   | Measured at 5-yr follow-up | continuous measure                                                                                                    |
| Height (cm)                                                                                                | Measured at 5-yr follow-up | continuous measure                                                                                                    |
| <b><i>Lifestyle/Nutrition</i></b>                                                                          |                            |                                                                                                                       |
| Breastfeeding                                                                                              | At infancy                 | breastfed or not                                                                                                      |
| Top food group servings per day                                                                            | At 5-yr follow-up          | 5 <sup>th</sup> Quintile (>6.47 servings) versus 1-4 Quintiles.                                                       |
| Fruits & Vegetables food group servings /day                                                               | At 5-yr follow-up          | 1 <sup>st</sup> Quintile (<2.1 servings) versus 2-5 Quintiles                                                         |
| Total Energy intake (kilocalories/day)                                                                     | At 5-yr follow-up          | 5 <sup>th</sup> Quintile (>1794 kcal) versus 1-4 Quintiles                                                            |
| Total Fats intake (grams/day)                                                                              | At 5-yr follow-up          | 5 <sup>th</sup> Quintile (>62.9g) versus 1-4 Quintiles                                                                |
| <b>Family characteristics</b>                                                                              |                            |                                                                                                                       |
| <b><i>Socio-Economic</i></b>                                                                               |                            |                                                                                                                       |
| Household weekly income                                                                                    | At 5-yr follow-up          | composite family income more or less than 760 Euros a week                                                            |
| Entitlement to General Medical Card scheme, a means tested healthcare benefits scheme                      | At 5-yr follow-up          | Families entitled or not to General Medical Card                                                                      |
| <b><i>Psycho-Social</i></b>                                                                                |                            |                                                                                                                       |
| Fathers' participation (Family stability)                                                                  | Early pregnancy stage      | Families whose fathers participated in the study versus families whose fathers did not                                |
| Mother's marital status (Family structure)                                                                 | At 5-yr follow-up          | Married or cohabiting versus single, separated, divorced or widowed.                                                  |
| Elder children in family [Parity was a proxy measure for presence of elder siblings to the Lifeways child] | Early pregnancy stage      | nullipara versus one or more para                                                                                     |
| Support from spouse or partner                                                                             | At 5-yr follow-up          | Mothers perceived "a lot" of support from spouse or partners versus perceived receiving "some, so-so, little" support |
| Support from parents                                                                                       | At 5-yr follow-up          | Mothers perceived "a lot" of support from parents versus                                                              |

|    |                                                 |                   |                               |
|----|-------------------------------------------------|-------------------|-------------------------------|
| 1  |                                                 |                   |                               |
| 2  |                                                 |                   |                               |
| 3  |                                                 |                   | perceived receiving “some,    |
| 4  |                                                 |                   | so-so, little” support        |
| 5  | Support from children, inclusive Lifeways child | At 5-yr follow-up | Mothers perceived “a lot” of  |
| 6  |                                                 |                   | support from children versus  |
| 7  |                                                 |                   | perceived receiving “some,    |
| 8  |                                                 |                   | so-so, little” support        |
| 9  | Support from close relatives                    | At 5-yr follow-up | Mothers perceived “a lot” of  |
| 10 |                                                 |                   | support from relatives versus |
| 11 |                                                 |                   | perceived receiving “some,    |
| 12 |                                                 |                   | so-so, little” support        |

## Maternal characteristics

### **Demographic and Anthropometric**

|    |                                              |                                                       |                                                                                             |
|----|----------------------------------------------|-------------------------------------------------------|---------------------------------------------------------------------------------------------|
| 17 | Age at 5-year follow-up (years)              | At 5-yr follow-up                                     | continuous measure                                                                          |
| 18 | Pre-pregnancy BMI (kg/m <sup>2</sup> )       | Pre-pregnancy,<br>Self-reported in<br>early pregnancy | continuous measure<br>Also as obese versus<br>overweight or normal using<br>WHO definitions |
| 22 | BMI at 5-year follow-up (kg/m <sup>2</sup> ) | Measured at<br>5-yr follow-up                         | continuous measure<br>Also as obese versus<br>overweight or normal using<br>WHO definitions |
| 27 | Waist Circumference at 5-year follow-up (cm) | Measured at<br>5-yr follow-up                         | continuous measure                                                                          |
| 29 | Height at 5-year follow-up (cm)              | Measured at<br>5-yr follow-up                         | continuous measure                                                                          |

### **Lifestyle/Nutrition**

|    |                                              |                          |                                                                    |
|----|----------------------------------------------|--------------------------|--------------------------------------------------------------------|
| 32 | Smoking during pregnancy                     | Early pregnancy<br>stage | Current smoker or not                                              |
| 34 | Smoking at 5-year follow-up                  | At 5-yr follow-up        | Current smoker or not                                              |
| 37 | Top food group servings per day              | At 5-yr follow-up        | 5 <sup>th</sup> Quintile (>8.35 servings)<br>versus 1-4 Quintiles. |
| 39 | Fruits & Vegetables food group servings /day | At 5-yr follow-up        | 1 <sup>st</sup> Quintile (<4.5 servings)<br>versus 2-5 Quintiles   |
| 41 | Total Energy intake (kilocalories/day)       | At 5-yr follow-up        | 5 <sup>th</sup> Quintile (>2570.9 kcal)<br>versus 1-4 Quintiles    |
| 43 | Total Fats intake (grams/day)                | At 5-yr follow-up        | 5 <sup>th</sup> Quintile (>106.0 g) versus<br>1-4 Quintiles        |

### **Socio-Economic**

|    |                   |                          |                                                        |
|----|-------------------|--------------------------|--------------------------------------------------------|
| 46 | Education level   | Early pregnancy<br>stage | Third level versus lower<br>levels of education status |
| 48 | Employment status | At 5-yr follow-up        | Non-earning versus<br>Employed versus Self<br>employed |

### **Health**

|    |                                     |                   |                                                                                                                            |
|----|-------------------------------------|-------------------|----------------------------------------------------------------------------------------------------------------------------|
| 53 | Self-rated health status of mothers | At 5-yr follow-up | Relatively Positive<br>(“Excellent” or “Very Good”)<br>versus Relatively Negative<br>(“Poor”/ “Fair” /“Good”)<br>responses |
|----|-------------------------------------|-------------------|----------------------------------------------------------------------------------------------------------------------------|

## Paternal Characteristics

### **Anthropometric**

|    |                                              |             |                    |
|----|----------------------------------------------|-------------|--------------------|
| 60 | BMI at 5-year follow-up (kg/m <sup>2</sup> ) | Measured at | continuous measure |
|----|----------------------------------------------|-------------|--------------------|

|    |                                                |                               |                                                                                                                            |
|----|------------------------------------------------|-------------------------------|----------------------------------------------------------------------------------------------------------------------------|
| 1  |                                                |                               |                                                                                                                            |
| 2  |                                                |                               |                                                                                                                            |
| 3  |                                                |                               |                                                                                                                            |
| 4  | Waist Circumference at 5-year follow-up (cm)   | 5-yr follow-up<br>Measured at | continuous measure                                                                                                         |
| 5  |                                                | 5-yr follow-up                |                                                                                                                            |
| 6  | Height at 5-year follow-up (cm)                | Measured at                   | continuous measure                                                                                                         |
| 7  |                                                | 5-yr follow-up                |                                                                                                                            |
| 8  |                                                |                               |                                                                                                                            |
| 9  | <b>Lifestyle</b>                               |                               |                                                                                                                            |
| 10 | Smoking at 5-year follow-up                    | At 5-yr follow-up             | Current smoker or not                                                                                                      |
| 11 | <b>Socio-Economic</b>                          |                               |                                                                                                                            |
| 12 | Education level                                | Early pregnancy<br>stage      | Third level versus lower<br>levels of education status                                                                     |
| 13 |                                                | At 5-yr follow-up             | Non-earning versus<br>Employed versus Self<br>employed                                                                     |
| 14 | Employment status                              |                               |                                                                                                                            |
| 15 |                                                |                               |                                                                                                                            |
| 16 |                                                |                               |                                                                                                                            |
| 17 |                                                |                               |                                                                                                                            |
| 18 | <b>Health</b>                                  |                               |                                                                                                                            |
| 19 | Self-rated health status of fathers (in proxy) | At 5-yr follow-up             | Relatively Positive<br>("Excellent" or "Very Good")<br>versus Relatively Negative<br>("Poor"/ "Fair" /"Good")<br>responses |
| 20 |                                                |                               |                                                                                                                            |
| 21 |                                                |                               |                                                                                                                            |
| 22 |                                                |                               |                                                                                                                            |
| 23 |                                                |                               |                                                                                                                            |
| 24 |                                                |                               |                                                                                                                            |
| 25 |                                                |                               |                                                                                                                            |
| 26 |                                                |                               |                                                                                                                            |
| 27 |                                                |                               |                                                                                                                            |
| 28 |                                                |                               |                                                                                                                            |
| 29 |                                                |                               |                                                                                                                            |
| 30 |                                                |                               |                                                                                                                            |
| 31 |                                                |                               |                                                                                                                            |
| 32 |                                                |                               |                                                                                                                            |
| 33 |                                                |                               |                                                                                                                            |
| 34 |                                                |                               |                                                                                                                            |
| 35 |                                                |                               |                                                                                                                            |
| 36 |                                                |                               |                                                                                                                            |
| 37 |                                                |                               |                                                                                                                            |
| 38 |                                                |                               |                                                                                                                            |
| 39 |                                                |                               |                                                                                                                            |
| 40 |                                                |                               |                                                                                                                            |
| 41 |                                                |                               |                                                                                                                            |
| 42 |                                                |                               |                                                                                                                            |
| 43 |                                                |                               |                                                                                                                            |
| 44 |                                                |                               |                                                                                                                            |
| 45 |                                                |                               |                                                                                                                            |
| 46 |                                                |                               |                                                                                                                            |
| 47 |                                                |                               |                                                                                                                            |
| 48 |                                                |                               |                                                                                                                            |
| 49 |                                                |                               |                                                                                                                            |
| 50 |                                                |                               |                                                                                                                            |
| 51 |                                                |                               |                                                                                                                            |
| 52 |                                                |                               |                                                                                                                            |
| 53 |                                                |                               |                                                                                                                            |
| 54 |                                                |                               |                                                                                                                            |
| 55 |                                                |                               |                                                                                                                            |
| 56 |                                                |                               |                                                                                                                            |
| 57 |                                                |                               |                                                                                                                            |
| 58 |                                                |                               |                                                                                                                            |
| 59 |                                                |                               |                                                                                                                            |
| 60 |                                                |                               |                                                                                                                            |

eTable 2: Multivariable Logistic Regression model for predictors of children's relatively positive parent-rated health, PRH (N=303)

|                                                                        | Relatively Positive PRH      |         | Relatively Positive PRH     |         | Relatively Positive PRH    |         |
|------------------------------------------------------------------------|------------------------------|---------|-----------------------------|---------|----------------------------|---------|
|                                                                        | BMI Categorical <sup>1</sup> |         | BMI Continuous <sup>2</sup> |         | WC Continuous <sup>3</sup> |         |
|                                                                        | Std OR                       | p-value | Std OR                      | p-value | Std OR                     | p-value |
| <b>Child's Individual Characteristics</b>                              |                              |         |                             |         |                            |         |
| BMI [IOTF], Obese <sup>+</sup> vs Overweight / Normal                  | 1.53*                        | 0.01    |                             |         |                            |         |
| BMI kg/m <sup>2</sup> [Continuous]                                     |                              |         | 0.58**                      | 0.009   |                            |         |
| Waist Circumference cm [Continuous]                                    |                              |         |                             |         | 0.60*                      | 0.02    |
| Fats gm [Quintiles], Q5 <sup>+</sup> vs Q1-4                           | 1.20                         | 0.50    | 1.18                        | 0.55    | 1.12                       | 0.68    |
| Top shelf servings/d [Quintiles], Q5 <sup>+</sup> vs Q1-4              | 1.09                         | 0.76    | 1.11                        | 0.69    | 1.11                       | 0.70    |
| Fruits Veg shelf servings/d [Quintiles], Q1 <sup>+</sup> vs Q2-5       | 1.43                         | 0.13    | 1.49                        | 0.10    | 1.46                       | 0.12    |
| <b>Family Characteristics</b>                                          |                              |         |                             |         |                            |         |
| Household Weekly Income, Less <sup>+</sup> vs High                     | 1.34                         | 0.26    | 1.30                        | 0.31    | 1.32                       | 0.29    |
| Entitlement to General Medical, Card Yes <sup>+</sup> vs No            | 0.98                         | 0.93    | 1.01                        | 0.97    | 1.01                       | 0.95    |
| Fathers' Participation, No <sup>+</sup> vs Yes                         | 1.37                         | 0.23    | 1.36                        | 0.23    | 1.43                       | 0.17    |
| Support from Spouse/Partner, Less <sup>+</sup> vs More                 | 0.86                         | 0.59    | 0.84                        | 0.53    | 0.88                       | 0.63    |
| Support from Parents, Less <sup>+</sup> vs More                        | 1.30                         | 0.32    | 1.41                        | 0.20    | 1.42                       | 0.19    |
| Support from Children, Less <sup>+</sup> vs More                       | 1.07                         | 0.80    | 1.13                        | 0.65    | 1.11                       | 0.70    |
| Support from Close Relatives, Less <sup>+</sup> vs More                | 0.93                         | 0.81    | 0.93                        | 0.79    | 0.92                       | 0.79    |
| <b>Maternal Characteristics</b>                                        |                              |         |                             |         |                            |         |
| Energy Kcal [Quintiles], Q5 <sup>+</sup> vs Q1-4                       | 1.28                         | 0.50    | 1.31                        | 0.47    | 1.19                       | 0.61    |
| Fats gm [Quintiles], Q5 <sup>+</sup> vs Q1-4                           | 0.88                         | 0.76    | 0.82                        | 0.62    | 0.97                       | 0.93    |
| Top shelf servings/d [Quintiles], Q5 <sup>+</sup> vs Q1-4              | 1.03                         | 0.91    | 1.11                        | 0.69    | 1.07                       | 0.80    |
| Education, Lower <sup>+</sup> vs Third level                           | 1.15                         | 0.58    | 1.16                        | 0.56    | 1.21                       | 0.45    |
| Self reported health status, Rel.Negative <sup>+</sup> vs Rel.Positive | 1.88**                       | 0.008   | 1.92**                      | 0.006   | 1.88**                     | 0.007   |
| <b>Paternal Characteristics</b>                                        |                              |         |                             |         |                            |         |
| Current Smoking status, Yes <sup>+</sup> vs No                         | 1.15                         | 0.55    | 1.13                        | 0.62    | 1.21                       | 0.42    |
| Education, Lower <sup>+</sup> vs Third level                           | 0.85                         | 0.55    | 0.90                        | 0.70    | 0.92                       | 0.75    |
| Employment, Non-earning <sup>+</sup> vs Self employed                  | 1.33                         | 0.24    | 1.29                        | 0.30    | 1.32                       | 0.27    |
| Self reported health status, Rel.Negative <sup>+</sup> vs Rel.Positive | 1.20                         | 0.46    | 1.22                        | 0.42    | 1.18                       | 0.50    |

Std OR=Standardised Odds Ratio, all variables rescaled to have a mean of zero and a standard deviation of one; \*\*p<0.01 (2-tailed), \*p<0.05 (2-tailed)

†Reference category (Std OR=1); Rel.Negative=Relatively Negative, Rel.Positive=Relatively Positive

<sup>1</sup>Child BMI as a categorical variable

<sup>2</sup>Child BMI as a continuous variable

<sup>3</sup>Child waist circumference as a continuous variable

STROBE Statement: Preschoolers' parent rated health disparities are strongly associated with measures of adiposity in the Lifeways cohort study children

|                           | Item No | Recommendation                                                                                                                                                                                    | Done |
|---------------------------|---------|---------------------------------------------------------------------------------------------------------------------------------------------------------------------------------------------------|------|
| <b>Title and abstract</b> | 1       | (a) Indicate the study's design with a commonly used term in the title or the abstract                                                                                                            | ✓    |
|                           |         | (b) Provide in the abstract an informative and balanced summary of what was done and what was found                                                                                               | ✓    |
| <b>Introduction</b>       |         |                                                                                                                                                                                                   |      |
| Background/rationale      | 2       | Explain the scientific background and rationale for the investigation being reported                                                                                                              | ✓    |
| Objectives                | 3       | State specific objectives, including any prespecified hypotheses                                                                                                                                  | ✓    |
| <b>Methods</b>            |         |                                                                                                                                                                                                   |      |
| Study design              | 4       | Present key elements of study design early in the paper                                                                                                                                           | ✓    |
| Setting                   | 5       | Describe the setting, locations, and relevant dates, including periods of recruitment, exposure, follow-up, and data collection                                                                   | ✓    |
| Participants              | 6       | (a) Give the eligibility criteria, and the sources and methods of selection of participants. Describe methods of follow-up                                                                        | ✓    |
|                           |         | (b) For matched studies, give matching criteria and number of exposed and unexposed                                                                                                               |      |
| Variables                 | 7       | Clearly define all outcomes, exposures, predictors, potential confounders, and effect modifiers. Give diagnostic criteria, if applicable                                                          | ✓    |
| Data sources/measurement  | 8*      | For each variable of interest, give sources of data and details of methods of assessment (measurement). Describe comparability of assessment methods if there is more than one group              | ✓    |
| Bias                      | 9       | Describe any efforts to address potential sources of bias                                                                                                                                         | ✓    |
| Study size                | 10      | Explain how the study size was arrived at                                                                                                                                                         |      |
| Quantitative variables    | 11      | Explain how quantitative variables were handled in the analyses. If applicable, describe which groupings were chosen and why                                                                      | ✓    |
| Statistical methods       | 12      | (a) Describe all statistical methods, including those used to control for confounding                                                                                                             | ✓    |
|                           |         | (b) Describe any methods used to examine subgroups and interactions                                                                                                                               | ✓    |
|                           |         | (c) Explain how missing data were addressed                                                                                                                                                       | ✓    |
|                           |         | (d) If applicable, explain how loss to follow-up was addressed                                                                                                                                    | ✓    |
|                           |         | (e) Describe any sensitivity analyses                                                                                                                                                             | ✓    |
| <b>Results</b>            |         |                                                                                                                                                                                                   |      |
| Participants              | 13*     | (a) Report numbers of individuals at each stage of study—eg numbers potentially eligible, examined for eligibility, confirmed eligible, included in the study, completing follow-up, and analysed | ✓    |
|                           |         | (b) Give reasons for non-participation at each stage                                                                                                                                              | ✓    |
|                           |         | (c) Consider use of a flow diagram                                                                                                                                                                |      |
| Descriptive data          | 14*     | (a) Give characteristics of study participants (eg demographic, clinical, social) and information on exposures and potential confounders                                                          | ✓    |
|                           |         | (b) Indicate number of participants with missing data for each variable of interest                                                                                                               | ✓    |
|                           |         | (c) Summarise follow-up time (eg, average and total amount)                                                                                                                                       | ✓    |
| Outcome data              | 15*     | Report numbers of outcome events or summary measures over time                                                                                                                                    | ✓    |
| Main results              | 16      | (a) Give unadjusted estimates and, if applicable, confounder-adjusted                                                                                                                             | ✓    |

|                          |    |                                                                                                                                                                            |   |
|--------------------------|----|----------------------------------------------------------------------------------------------------------------------------------------------------------------------------|---|
|                          |    | estimates and their precision (eg, 95% confidence interval). Make clear which confounders were adjusted for and why they were included                                     |   |
|                          |    | (b) Report category boundaries when continuous variables were categorized                                                                                                  | ✓ |
|                          |    | (c) If relevant, consider translating estimates of relative risk into absolute risk for a meaningful time period                                                           |   |
| Other analyses           | 17 | Report other analyses done—eg analyses of subgroups and interactions, and sensitivity analyses                                                                             | ✓ |
| <b>Discussion</b>        |    |                                                                                                                                                                            |   |
| Key results              | 18 | Summarise key results with reference to study objectives                                                                                                                   | ✓ |
| Limitations              | 19 | Discuss limitations of the study, taking into account sources of potential bias or imprecision. Discuss both direction and magnitude of any potential bias                 | ✓ |
| Interpretation           | 20 | Give a cautious overall interpretation of results considering objectives, limitations, multiplicity of analyses, results from similar studies, and other relevant evidence | ✓ |
| Generalisability         | 21 | Discuss the generalisability (external validity) of the study results                                                                                                      | ✓ |
| <b>Other information</b> |    |                                                                                                                                                                            |   |
| Funding                  | 22 | Give the source of funding and the role of the funders for the present study and, if applicable, for the original study on which the present article is based              | ✓ |

\*Give information separately for exposed and unexposed groups.

**Note:** An Explanation and Elaboration article discusses each checklist item and gives methodological background and published examples of transparent reporting. The STROBE checklist is best used in conjunction with this article (freely available on the Web sites of PLoS Medicine at <http://www.plosmedicine.org/>, Annals of Internal Medicine at <http://www.annals.org/>, and Epidemiology at <http://www.epidem.com/>). Information on the STROBE Initiative is available at <http://www.strobe-statement.org>.

# BMJ Open

## Preschoolers' parent rated health disparities are strongly associated with measures of adiposity in the Lifeways cohort study children

|                                 |                                                                                                                                                                                                                                                                                                                                   |
|---------------------------------|-----------------------------------------------------------------------------------------------------------------------------------------------------------------------------------------------------------------------------------------------------------------------------------------------------------------------------------|
| Journal:                        | <i>BMJ Open</i>                                                                                                                                                                                                                                                                                                                   |
| Manuscript ID:                  | bmjopen-2014-005328.R2                                                                                                                                                                                                                                                                                                            |
| Article Type:                   | Research                                                                                                                                                                                                                                                                                                                          |
| Date Submitted by the Author:   | 26-Jun-2014                                                                                                                                                                                                                                                                                                                       |
| Complete List of Authors:       | Shrivastava, Aakash; University College Dublin, School of Public Health, Physiotherapy & Population Science<br>Murrin, Celine; University College Dublin, School of Public Health, Physiotherapy & Population Science<br>Kelleher, Cecily; University College Dublin, School of Public Health, Physiotherapy & Population Science |
| <b>Primary Subject Heading</b>: | Epidemiology                                                                                                                                                                                                                                                                                                                      |
| Secondary Subject Heading:      | Epidemiology, Public health, Paediatrics                                                                                                                                                                                                                                                                                          |
| Keywords:                       | Lifecourse, self-rated health, obesity, BMI, waist circumference, preschool children                                                                                                                                                                                                                                              |
|                                 |                                                                                                                                                                                                                                                                                                                                   |

SCHOLARONE™  
Manuscripts



1  
2  
3 **Title: Preschoolers' parent rated health disparities are strongly associated with**  
4 **measures of adiposity in the Lifeways cohort study children**  
5  
6

7 **CORRESPONDING AUTHOR:**

8 Professor Cecily C Kelleher

9 School of Public Health, Physiotherapy and Population Science,

10 Woodview House,

11 University College Dublin

12 Belfield,

13 Dublin 4, Republic of Ireland

14 Tel: +3531 7162045

15 Fax: +3531 7163421

16 cecily.kelleher@ucd.ie  
17  
18  
19  
20  
21  
22  
23

24 **AUTHORS**

25 Aakash Shrivastava<sup>1</sup> PhD

26 Celine Murrin<sup>1</sup> PhD

27 Cecily C Kelleher<sup>1</sup> MD

28 <sup>1</sup>School of Public Health, Physiotherapy and Population Science, University College Dublin,  
29 Woodview House, Belfield, Dublin 4, Republic of Ireland  
30  
31  
32  
33  
34

35 **Running Title: Childhood obesity a persistent predictor of preschoolers' PRH**  
36  
37

38 **KEYWORDS**

39 Lifecourse, self-rated health, obesity, BMI, waist circumference, preschool children  
40  
41  
42

43 **Word count: 3439**  
44  
45  
46  
47  
48  
49  
50  
51  
52  
53  
54  
55  
56  
57  
58  
59  
60

**ABSTRACT (Words: 272)****Objective**

To examine the relationship between lifecourse factors from preschoolers' micro-ecosystem and their parent-reported (mother-reported) health (PRH), following them prospectively from preconception to age 5-years. To investigate if preschoolers' BMI and waist-circumference were associated with preschoolers' PRH when controlled for lifecourse predictors.

**Design**

Lifeways cross-generation cohort study

**Setting**

Ireland

**Participants**

Of 1082 families, 62% mothers responded on a health and lifestyle questionnaire at follow-up. Food frequency, BMI and waist-circumference were measured. There were 547 family datasets available for analysis of children's PRH.

**Main outcome measure**

Mother-reported children's PRH at age-5. Associations with child's individual and familial exposures from preconception to age 5-years examined using logistic regression.

**Results**

In univariate analysis, relatively-positive rating of children's PRH were associated with children's lower intake of fats [OR(95%CI)=2.2(1.1-4.3)], higher intake of fruits/vegetables [OR(95%CI)=2.2(1.1-4.3)]; as well as familial socio-economic characteristics {higher household income [OR(95%CI)=3.0(1.6-5.9)], non-entitlement to means-tested healthcare

1  
2  
3 [OR(95%CI)=2.1(1.0-4.3)], mothers' higher education [OR(95%CI)=1.9(1.0-3.6)], psycho-  
4  
5 social characteristics {father's participation in study [OR(95%CI)=2.1(1.0-4.3)], mothers'  
6  
7 perceiving better support from partner [OR(95%CI)=2.3(1.2-4.3)], children  
8  
9 [OR(95%CI)=1.9(1.0-3.7)] or relatives [OR(95%CI)=2.2(1.1-4.1)]}, parents' lifestyle  
10  
11 {mothers' lower intake of energy [OR(95%CI)=2.2(1.1-4.3)], fathers' non-smoking status  
12  
13 [OR(95%CI)=2.2(1.1-4.4)]}, and parents' health {mothers' self-rated health relatively-  
14  
15 positive [OR(95%CI)=5.1(2.6-9.9)], fathers' self-rated health relatively-positive  
16  
17 [OR(95%CI)=3.0(1.5-6.0)]}.

18  
19  
20  
21 In multivariable analysis ( $\chi^2=34.2, df=21, N=303, R^2=0.26, p<0.05$ ), one of the two strong  
22  
23 predictors of children's relatively-positive PRH was child not being obese by International  
24  
25 Obesity Task Force classification [OR(95%CI)=5.5(1.4-21.0)], observed also using BMI  
26  
27 ( $\text{kg/m}^2$ ) [OR(95%CI)=0.73(0.58-0.93)] or waist-circumference (cm) [OR(95%CI)=0.89(0.81-  
28  
29 0.98)] as continuous variables. The other significant predictor was mothers' self-rated health  
30  
31 relatively-positive [OR(95%CI)=4.2(1.5-12.2)].

### 32 33 34 35 **Conclusions**

36  
37  
38 Preschoolers' health is adversely associated with obesity and this is independent of lifecourse  
39  
40 social and environmental inequalities. The findings suggest that reducing childhood obesity  
41  
42 and improving maternal health may be useful ways to improve child's global health.  
43  
44  
45  
46  
47  
48  
49  
50  
51  
52  
53  
54  
55  
56  
57  
58  
59  
60

### Strengths and limitations of this study

- Nationally representative sample of preschool-age children
- Examines the influence of lifecourse adversities, prospectively measured from preconception to age 5 on children's general health at age 5. The study analyses demographic, anthropometric, lifestyle, food and nutrients intake, psycho-social, socio-economic and health-related exposures from both children's individual as well as parental experiences.
- Demonstrates a significant and independent association between preschoolers' measured BMI as well as waist circumference and their general health status.
- The study is limited by a relatively small sample and use of parent-reported health status.

## MAIN TEXT

### Introduction

The development of children is critical to their adult well-being<sup>[1,2]</sup> and across the lifecourse even subjective estimates may be useful to reflect objectively measured health<sup>[3,4]</sup>. Bronfenbrenner<sup>[5]</sup> emphasised the importance of children's micro-ecosystem in their development. Recently, the World Health Organisation's (WHO) Commission on Social Determinants of Health (CSDH) presented a Total Environment Assessment Model for Early Child Development (TEAM-ECD),<sup>[6]</sup> which again illustrates the importance of individual and family spheres of influence on children's health. The relevance of socio-economic, psycho-social and lifestyle environment in child development and health is widely acknowledged.<sup>[6-8]</sup>

According to the lifecourse hypothesis, risk transmission is characterised by critical periods and accumulation of risk models.<sup>[9]</sup> Life Course Health Development (LCHD) framework<sup>[10]</sup> suggests that health is a consequence of multiple determinants that change in context of time and circumstances as an individual develops; these experiences are programmed into bio-behavioural regulatory systems during certain critical and sensitive periods of individual's lifetime to decide their health trajectory. The lifecourse framework on childhood disadvantage and adult health<sup>[11]</sup> suggests that parental and childhood circumstances from the point of conception influences individual's health in later life, and the individual's childhood health and later life circumstances may further add to this foundation. Based on this, Hertzman and colleagues<sup>[12]</sup> examined self-rated health in adulthood using an integrated lifecourse framework. There are a few other studies also which have examined lifecourse determinants of adult global<sup>[13,14]</sup> or specific health status.<sup>[15]</sup> On the contrary, the literature on the determinants of child global health status is sparse,<sup>[16,17]</sup> particularly for the preschool-age children.<sup>[18]</sup> Even rarer are studies whose examination includes early lifecourse determinants of child global health status.

1  
2  
3 Thus the first objective of our analysis was to prospectively examine the relationship between  
4 demographic, anthropometric, lifestyle, nutritional, psycho-social, socio-economic and  
5 health-related lifecourse exposures taken from the children's individual and family spheres of  
6 influence starting from preconception up to age 5-years and their global health status at  
7 preschool-age.  
8  
9

10  
11  
12 In social epidemiology, the construct of “embodiment” refers to biological expression of  
13 individuals' materio-social world.<sup>[19,20]</sup> Similarly in lifecourse epidemiology, it is  
14 hypothesised that early life experiences get “biologically embedded” during critical or  
15 sensitive periods of child development leading to gradients in health.<sup>[21,22]</sup>  
16  
17  
18  
19  
20  
21  
22

23  
24 The Foresight report identifies a large array of environmental determinants of obesity, a  
25 number of which are again related to early child development.<sup>[23]</sup> This suggests obesity as  
26 pivotal risk factor for subsequent health conditions.<sup>[24]</sup>  
27  
28  
29  
30

31 The negative relationship between obesity and self-rated health is now increasingly reported  
32 in adult populations,<sup>[25,26]</sup> some indicating a temporal relationship<sup>[27,28]</sup> and suggesting that  
33 obesity increases health inequalities over time.<sup>[28]</sup> However, evidence on the relationship  
34 between obesity and health is relatively limited in child population studies and those  
35 available have reported health-related-quality-of-life (HR-QoL)<sup>[29]</sup> instead of a generic  
36 measure such as global self-rated health. Moreover, this association is yet to be established  
37 for preschool-age children. To our knowledge just two population based studies have  
38 examined this association in preschool age-group children<sup>[30,31]</sup> and neither had nutritional  
39 information.  
40  
41  
42  
43  
44  
45  
46  
47  
48  
49  
50

51 In the Longitudinal Study of Australian Children, Wake *et al.*<sup>[30]</sup> did not find a significant  
52 difference in global health status of overweight/obese and normal weight 4-5-year-old  
53 children. Skinner *et al.*,<sup>[31]</sup> using data on 3-5-year-olds from the US National Health and  
54  
55  
56  
57  
58  
59  
60

1  
2  
3 Nutrition Examination Survey, reported a poorer global health status in obese and severely  
4 obese preschoolers. Neither of these studies accounted for a number of possibly relevant  
5 confounders, including parental BMI, parental health and nutritional variables.  
6  
7

8  
9  
10 We thus hypothesised that similar to findings from studies on older age-groups,  
11 anthropometric markers of child obesity in our preschool-age children study would also  
12 demonstrate a negative association with their global health status. The next objective of our  
13 analysis was to examine whether anthropometric markers of child obesity would emerge as  
14 strong predictors of global health status when accounted for other socio-economic, psycho-  
15 social, and lifestyle environmental factors in a multivariable model.  
16  
17  
18  
19  
20  
21  
22

## 23 **Methods**

24  
25  
26 The Lifeways cross generation cohort study comprises three generations of 1082 Irish  
27 families and was established in 2001-03; the recruitment procedure of this nationally  
28 representative cohort has been described previously.<sup>[32-34]</sup> The a priori purpose was to  
29 examine familial and cross-generation influences on early childhood development over the  
30 first five years of children's lives. Briefly, would-be mothers were at random recruited from  
31 the two regional maternity hospitals in the Republic of Ireland to get a representative sample.  
32  
33  
34  
35  
36  
37  
38  
39  
40  
41  
42  
43  
44  
45  
46  
47  
48  
49  
50  
51  
52  
53  
54  
55  
56  
57  
58  
59  
60

A comparison between the Lifeways mothers and a nationally representative sample of women of the same age group from the SLÁN (Survey of Lifestyle, Attitudes and Nutrition) surveys of Republic of Ireland<sup>[35]</sup> confirmed that the Lifeways mothers were satisfactorily representative of the Irish general women on socio-demographic characteristics.<sup>[33]</sup>

At this early pregnancy stage mothers completed a health and lifestyle status questionnaire adapted from a validated instrument developed for Irish national SLÁN surveys.<sup>[35]</sup> Mothers reported their pre-pregnancy height (cm) and weight (kg) and their smoking status during pregnancy. Mothers' and partners' socio-economic status was recorded. Subsequently at

1  
2  
3 birth, the live infants were added to the cohort along-with maternity and birth related hospital  
4  
5 information.  
6

7  
8 In 2007-08, when these children averaged five years of age, the cohort follow-up recorded a  
9  
10 62% response rate.<sup>[34,36]</sup> Though mothers who responded to the follow-up were more likely to  
11  
12 be of higher socioeconomic status, these mothers did not significantly differ in their baseline  
13  
14 anthropometric characteristics (including BMI) from non-responders.<sup>[34,36]</sup> At this 5-year  
15  
16 follow-up, mothers repeated the health and lifestyle assessment questionnaire, with additional  
17  
18 questions related to her family, including a five-level likert item question “In general, would  
19  
20 you say your / your partner’s / your Lifeways child’s current health is Excellent, Very Good,  
21  
22 Good, Fair or Poor”. Mothers provided information on family’s socio-economic, psycho-  
23  
24 social, and lifestyle status. Mothers reported their habitual dietary intake for the previous year  
25  
26 on a semi-quantitative food frequency (SQFFQ) instrument developed from the EPIC study  
27  
28 (European Prospective Investigation into Cancer and Nutrition) and validated for Irish adult  
29  
30 population.<sup>[37]</sup> Mothers also gave details for the Lifeways child’s habitual diet for the  
31  
32 previous year using a different SQFFQ instrument adapted from the UK National Diet and  
33  
34 Nutrition Survey of 4.5-year-old children.<sup>[38]</sup> The mothers’ and children’s SQFFQ were  
35  
36 validated in the Lifeways study using a 7-day weighed food diary in a sub-sample.<sup>[36]</sup> Food  
37  
38 items were aggregated by defined shelves (food groups) of the Irish food pyramid and  
39  
40 assessment was made for average servings per day of standard food item portions consumed  
41  
42 from the “top” and “fruit and vegetable” food groups (shelves of Irish food pyramid). The  
43  
44 “top” food group comprises of high calorie fat and sugar rich foods. Total energy (kcal) and  
45  
46 total fats (g) intake were computed using conversion values from McCance & Widdowson’s  
47  
48 food composition tables<sup>[39]</sup> with a specially developed FFQ software version 1.0 ©.<sup>[40]</sup>  
49  
50  
51  
52  
53

54  
55 Mothers and children, and if available fathers, were offered at 5-year follow-up an  
56  
57 anthropometric assessment at their home for height (cm), weight (kg) and waist  
58  
59  
60



1  
2  
3 circumference (cm) using a standardised protocol,<sup>[34,36]</sup> with 80-85% mothers and children  
4  
5 participating. Body mass index (BMI) was calculated from weight and height information  
6  
7 (kg/m<sup>2</sup>).  
8

9  
10 Thus variables from discrete stages (pre-pregnancy, early pregnancy, at birth, early infancy  
11  
12 and 5-year follow-up) of child's early development representing lifecourse exposures from  
13  
14 distinct domains (demographic, anthropometric, socio-economic, psycho-social, lifestyle,  
15  
16 nutritional and health) of child's individual and family spheres of influence<sup>[6-8]</sup> were  
17  
18 considered to analyse determinants of child's health status at age-5. The selection of  
19  
20 variables, domains and spheres of influence are based on the CSDH constructed TEAM-  
21  
22 ECD, a model of early child development.<sup>[6-8]</sup> These lifecourse variables have been  
23  
24 summarised as per time frame in **Table 1**. This lifecourse time frame highlights the stages  
25  
26 and transition points relevant from perspective of child's health development.<sup>[10]</sup> Additional  
27  
28 details on these variables are provided in **eTable 1** available in the web only supplement. The  
29  
30 independent variables have been arranged as child-related, family-related, mother-related,  
31  
32 father-related groups for ease of presentation.  
33  
34  
35  
36  
37  
38  
39  
40  
41  
42  
43  
44  
45  
46  
47  
48  
49  
50  
51  
52  
53  
54  
55  
56  
57  
58  
59  
60

Table 1: Independent variables examined from lifecourse of 5-yr-old children

| <b>Lifecourse</b>               | <b>Independent Variables</b>                                                                                                                                                                                                                                                                                                                                                                                                                                                                                                                                                                                                             |
|---------------------------------|------------------------------------------------------------------------------------------------------------------------------------------------------------------------------------------------------------------------------------------------------------------------------------------------------------------------------------------------------------------------------------------------------------------------------------------------------------------------------------------------------------------------------------------------------------------------------------------------------------------------------------------|
| Pre-pregnancy                   | Maternal Pre-pregnancy BMI                                                                                                                                                                                                                                                                                                                                                                                                                                                                                                                                                                                                               |
| Early pregnancy                 | Family stability<br>Maternal smoking in pregnancy, Maternal Education level<br>Paternal Education level                                                                                                                                                                                                                                                                                                                                                                                                                                                                                                                                  |
| Birth                           | Child's Birth-weight, Gestational age, Gender<br>Maternal Parity                                                                                                                                                                                                                                                                                                                                                                                                                                                                                                                                                                         |
| Infancy                         | Child's breastfeeding status                                                                                                                                                                                                                                                                                                                                                                                                                                                                                                                                                                                                             |
| When children averaged 5-yr age | Child's Age, Height, BMI, Waist circumference, Food intake: top and fruits & vegetables food groups, Nutrient intake: energy and fats intake<br>Family household weekly income, Entitlement to means tested healthcare benefits scheme, Family structure (marital status), Support from partner, parents, children & relatives<br>Maternal Age, Height, BMI, Waist circumference, Smoking, Employment status, Food intake: top and fruits & vegetables food groups, Nutrient intake: energy and fats intake, Self-rated health status<br>Paternal Height, BMI, Waist circumference, Smoking, Employment status, Self-rated health status |

Children's global health status rated in proxy by their mothers, hereafter referred to as parent-rated health (PRH), was the outcome variable of interest. The 5-graded scale response was dichotomised as relatively-positive health (excellent or very good) and relatively-negative health (poor or fair or good), based on similar dichotomisation in other studies on preschool and school children.<sup>[17,18,30]</sup> It is reasonable to take a higher cut-off when dichotomising this age dependent variable in this very young age-group as there would be very limited numbers of poor or fair health children.<sup>[17,18,41]</sup>

Initially, uni-variate associations were established between the independent predictors and children's PRH using independent t-tests or chi-square tests. Independent categorical variables were dichotomised in a manner that allowed contrasting extreme levels against the others. Thus, using International Obesity Task Force (IOTF) cut-offs, children's BMI was dichotomised as obese versus over-weight or normal-weight. Similarly nutrition variables ordered in quintiles were dichotomised as the extreme quintile (1<sup>st</sup> or 5<sup>th</sup>) versus the rest.

1  
2  
3 From these independent variables principally chosen on the basis of their relevance to the  
4 child's development,<sup>[6-8]</sup> all those that qualified at significance level 20% ( $p<0.2$ )<sup>[42]</sup> in  
5 univariate analyses were force entered into a multivariable logistic regression model. BMI  
6 ( $\text{kg}/\text{m}^2$ ) and waist circumference (cm), the anthropometric markers of obesity, were tested  
7 separately in independent multivariable models. They were not analysed together within a  
8 model as results of possible interactions among body composition variables would have been  
9 difficult to interpret <sup>[43,44]</sup>. Initially BMI was tested as a categorical variable in a model,  
10 followed by two additional models substituting it with BMI and then waist circumference as  
11 continuous variables. Other independent variables were tested as categorical variables.  
12  
13  
14  
15  
16  
17  
18  
19  
20  
21  
22

23 Ethical approval for the Lifeways study was obtained respectively from ethical committees of  
24 participating hospitals and the University College Dublin, Ireland. Written informed consent  
25 was obtained from study participants.  
26  
27  
28  
29

## 30 **Results**

31  
32 There were 547 family datasets available for analysis of children's PRH. **Table 2** presents the  
33 uni-variate associations between children's lifecourse variables and PRH. Within the  
34 individual-sphere of influences, children's lifestyle behaviours (lower intake of fatty/sugary  
35 foods and total fats, and higher intake of fruits/vegetables) and their anthropometric measures  
36 at age-5 (not being obese, lower BMI, and lower waist circumference) qualified as  
37 determinants of children's relatively-positive PRH for further examination in the  
38 multivariable model.  
39  
40  
41  
42  
43  
44  
45  
46  
47  
48

49 In other words, retaining  $p<0.2$  as the criterion for significance, the children's healthy food  
50 and nutrient intake habits – such as lower intake of unhealthy fat- and sugar- rich foods  
51 (servings/day) [OR(95%CI)=1.7(0.8-3.4)] or total fats (g) in their meals  
52 [OR(95%CI)=2.2(1.1-4.3)] and higher intake of healthy fruits and vegetables (servings/day)  
53  
54  
55  
56  
57  
58  
59  
60

1  
2  
3 [OR(95%CI)=2.2(1.1-4.3)] were positively associated with their favourable rating for health  
4  
5 by their mothers. Conversely, children's higher BMI ( $\text{kg/m}^2$ ) [OR(95%CI)=0.85(0.71-1.03)]  
6  
7 and waist circumference (cm) [OR(95%CI)=0.95(0.88-1.02)] were inversely associated with  
8  
9 a positive parental-rated health status.  
10

11  
12 Within the family-sphere of influences, socio-economic status (higher household income,  
13  
14 non-entitlement to subsidised healthcare, both parents' higher education status, and father's  
15  
16 employment status), psycho-social status (father's study participation, mother's perceived  
17  
18 social support), mother's lifestyle behaviours (lower intake of fatty/sugary foods, total energy  
19  
20 and total fats), father's lifestyle behaviours (non-smoker), and both parents' health status  
21  
22 (relatively-positive self-rated health) qualified as determinants of children's relatively-  
23  
24 positive PRH for further examination in the multivariable model.  
25  
26

27  
28 In other words, by maintaining  $p < 0.2$  as the criterion for significance, several indicators of a  
29  
30 family's better socio-economic status— such as higher household income (Euros/week)  
31  
32 [OR(95%CI)=3.0(1.6-5.9)], not requiring subsidised healthcare [OR(95%CI)=2.1(1.0-4.3)],  
33  
34 mother having a third level education [OR(95%CI)=1.9(1.0-3.6)], father having a third level  
35  
36 education [OR(95%CI)=1.9(1.0-3.6)], father being self-employed [OR(95%CI)=2.5(0.8-  
37  
38 7.9)]; family's better psycho-social status— such as father's involvement in family affairs  
39  
40 [OR(95%CI)=2.1(1.0-4.3)], mother's perceiving a positive social support from spouse  
41  
42 [OR(95%CI)=2.3(1.2-4.3)], parents [OR(95%CI)=2.0(1.0-4.1)], children  
43  
44 [OR(95%CI)=1.9(1.0-3.7)], or relatives [OR(95%CI)=2.2(1.1-4.1)]; family's better lifestyle  
45  
46 and food and nutrient intake habits— such as mother's lower intake of unhealthy fat- and  
47  
48 sugar- rich foods (servings/day) [OR(95%CI)=1.7(0.8-3.4)], total energy (kcal)  
49  
50 [OR(95%CI)=2.2(1.1-4.3)] and total fats (g) [OR(95%CI)=1.7(0.8-3.4)] in her meals, father's  
51  
52 not being a smoker [OR(95%CI)=2.2(1.1-4.4)]; and family's better health status— such as  
53  
54 mother [OR(95%CI)=5.1(2.6-9.9)] and father [OR(95%CI)=3.0(1.5-6.0)] having a positively  
55  
56  
57  
58  
59  
60

1  
2  
3  
4  
5  
6  
7  
8  
9  
10  
11  
12  
13  
14  
15  
16  
17  
18  
19  
20  
21  
22  
23  
24  
25  
26  
27  
28  
29  
30  
31  
32  
33  
34  
35  
36  
37  
38  
39  
40  
41  
42  
43  
44  
45  
46  
47  
48  
49  
50  
51  
52  
53  
54  
55  
56  
57  
58  
59  
60

rated health status were positively associated with children’s favourable rating for health by their mothers.

For peer review only

Table 2: Uni-variate lifecourse associates of children's relatively-positive parent-rated health, PRH (N=547)

|                                               | Relatively Negative PRH |                          | Relatively Positive PRH   |      | OR                        | 95% CI |
|-----------------------------------------------|-------------------------|--------------------------|---------------------------|------|---------------------------|--------|
|                                               | N                       | (n=42)<br>%(n) Mean (SD) | (n=505)<br>%(n) Mean (SD) |      |                           |        |
| <b>Child's Individual Characteristics</b>     |                         |                          |                           |      |                           |        |
| Birth-weight adjusted for gestational age (g) | 487                     | (34) 3564.1 (616)        | (453) 3548.4 (552)        | 1.00 | (0.999-1.001)             |        |
| Child's Age (Yrs)                             | 547                     | (42) 5.42 (0.23)         | (505) 5.46 (0.25)         |      |                           |        |
| Gender                                        | 547                     |                          |                           |      |                           |        |
| Male                                          |                         | 8.0% (22)                | 92.0% (242)               | Ref  |                           |        |
| Female                                        |                         | 7.1% (21)                | 92.9% (262)               | 1.14 | (0.60-2.20)               |        |
| BMI (kg/m <sup>2</sup> )                      | 464                     | (35) 17.09 (2.5)         | (429) 16.59 (1.6)         | 0.85 | (0.71-1.03) <sup>^</sup>  |        |
| BMI [IOTF]                                    | 464                     |                          |                           |      |                           |        |
| Obese                                         |                         | 16.7% (5)                | 83.3% (25)                | Ref  |                           |        |
| Overweight / Normal                           |                         | 6.9% (30)                | 93.1% (404)               | 2.69 | (0.96-7.54) <sup>^</sup>  |        |
| Waist Circumference (cm)                      | 462                     | (35) 57.01 (6.8)         | (427) 55.88 (4.3)         | 0.95 | (0.88-1.02) <sup>†</sup>  |        |
| Height (cm)                                   | 464                     | (35) 111.6 (5.6)         | (429) 112.1 (4.8)         | 1.02 | (0.95-1.10)               |        |
| Breastfeeding                                 | 528                     |                          |                           |      |                           |        |
| Not breastfed                                 |                         | 6.5% (16)                | 93.5% (229)               | Ref  |                           |        |
| Breastfed                                     |                         | 8.8% (25)                | 91.2% (258)               | 0.72 | (0.38-1.38)               |        |
| Energy (Kcal)                                 | 547                     |                          |                           |      |                           |        |
| Quintile 5 (>1794 kcal)                       |                         | 10% (11)                 | 90.0% (99)                | Ref  |                           |        |
| Quintile 1-4                                  |                         | 7.1% (31)                | 92.9% (406)               | 1.46 | (0.71-3.00)               |        |
| Fats (g)                                      | 547                     |                          |                           |      |                           |        |
| Quintile 5 (>62.9 g)                          |                         | 12.8% (14)               | 87.2% (95)                | Ref  |                           |        |
| Quintile 1-4                                  |                         | 6.4% (28)                | 93.6% (410)               | 2.16 | (1.09-4.26) <sup>*</sup>  |        |
| Top food group (servings/day)                 | 547                     |                          |                           |      |                           |        |
| Quintile 5 (>6.47 servings)                   |                         | 10.9% (12)               | 89.1% (98)                | Ref  |                           |        |
| Quintile 1-4                                  |                         | 6.9% (30)                | 93.1% (407)               | 1.66 | (0.82-3.36) <sup>†</sup>  |        |
| Fruits Veg food group (servings/d)            | 547                     |                          |                           |      |                           |        |
| Quintile 1 (<2.1 servings)                    |                         | 12.8% (14)               | 87.2% (95)                | Ref  |                           |        |
| Quintile 2-5                                  |                         | 6.4% (28)                | 93.6% (410)               | 2.16 | (1.09-4.26) <sup>*</sup>  |        |
| <b>Family Characteristics</b>                 |                         |                          |                           |      |                           |        |
| Household Weekly Income                       | 509                     |                          |                           |      |                           |        |
| Less than 760 Euros/wk                        |                         | 13.3% (26)               | 86.7% (170)               | Ref  |                           |        |
| More than 760 Euros/wk                        |                         | 4.8% (15)                | 95.2% (298)               | 3.04 | (1.57-5.90) <sup>**</sup> |        |
| Entitlement to General Medical Card           | 532                     |                          |                           |      |                           |        |
| Entitled                                      |                         | 13% (12)                 | 87.0% (80)                | Ref  |                           |        |
| Not entitled                                  |                         | 6.6% (29)                | 93.4% (411)               | 2.13 | (1.04-4.34) <sup>*</sup>  |        |
| Fathers' Participation                        | 547                     |                          |                           |      |                           |        |
| Not                                           |                         | 9.7% (31)                | 90.3% (290)               | Ref  |                           |        |
| Yes                                           |                         | 4.9% (11)                | 95.1% (215)               | 2.09 | (1.03-4.25) <sup>*</sup>  |        |
| Marital Status                                | 542                     |                          |                           |      |                           |        |
| Others                                        |                         | 11.4% (5)                | 88.6% (39)                | Ref  |                           |        |
| Married/Cohabiting                            |                         | 7.2% (36)                | 92.8% (462)               | 1.65 | (0.61-4.43)               |        |
| Elder children in family (Parity)             | 535                     |                          |                           |      |                           |        |
| Nullipara                                     |                         | 8% (18)                  | 92.0% (207)               | Ref  |                           |        |
| Multipara                                     |                         | 7.7% (24)                | 92.3% (286)               | 1.04 | (0.55-1.96)               |        |
| Support from Spouse/Partner                   | 538                     |                          |                           |      |                           |        |
| Lesser support                                |                         | 12.9% (17)               | 87.1% (115)               | Ref  |                           |        |
| More support                                  |                         | 6.2% (25)                | 93.8% (381)               | 2.25 | (1.18-4.32) <sup>*</sup>  |        |
| Support from Parents                          | 487                     |                          |                           |      |                           |        |
| Lesser support                                |                         | 12.5% (12)               | 87.5% (84)                | Ref  |                           |        |
| More support                                  |                         | 6.6% (26)                | 93.4% (365)               | 2.01 | (0.97-4.14) <sup>^</sup>  |        |
| Support from Children                         | 532                     |                          |                           |      |                           |        |
| Lesser support                                |                         | 10.6% (20)               | 89.4% (169)               | Ref  |                           |        |
| More support                                  |                         | 5.8% (20)                | 94.2% (323)               | 1.91 | (1.00-3.65) <sup>*</sup>  |        |
| Support from Close Relatives                  | 510                     |                          |                           |      |                           |        |
| Lesser support                                |                         | 12.4% (19)               | 87.6% (134)               | Ref  |                           |        |
| More support                                  |                         | 6.2% (22)                | 93.8% (335)               | 2.16 | (1.13-4.12) <sup>*</sup>  |        |

Table 2: Uni-variate lifecourse associates of children's relatively-positive parent-rated health, PRH (continued)

|                                            | N   | Relatively Negative PRH<br>(n=42) |             | Relatively Positive PRH<br>(n=505) |             | OR   | 95% CI        |
|--------------------------------------------|-----|-----------------------------------|-------------|------------------------------------|-------------|------|---------------|
|                                            |     | %(n)                              | Mean (SD)   | %(n)                               | Mean (SD)   |      |               |
| <b>Maternal Characteristics</b>            |     |                                   |             |                                    |             |      |               |
| Pre-pregnancy BMI (kg/m <sup>2</sup> )     | 475 | (36)                              | 23.3 (3.3)  | (439)                              | 23.8 (3.9)  | 1.04 | (0.94-1.14)   |
| Pre-pregnancy BMI [WHO cut offs]           |     |                                   |             |                                    |             |      |               |
| Obese                                      |     | 2.6% (1)                          |             | 97.4% (38)                         |             | Ref  |               |
| Overweight / Normal                        |     | 8% (35)                           |             | 92.0% (401)                        |             | 0.30 | (0.04-2.26)   |
| Mother's Age (Yrs)                         | 546 | (42)                              | 36.5 (6.3)  | (504)                              | 37.1 (5.3)  | 1.02 | (0.96-1.08)   |
| BMI at 5-yr follow-up (kg/m <sup>2</sup> ) | 432 |                                   | 25.6 (3.9)  |                                    | 26.3 (5.0)  | 1.03 | (0.95-1.12)   |
| BMI at 5-yr follow-up [WHO cut offs]       | 432 |                                   |             |                                    |             |      |               |
| Obese                                      |     | 7.2% (5)                          |             | 92.8% (64)                         |             | Ref  |               |
| Overweight / Normal                        |     | 7.4% (27)                         |             | 92.6% (336)                        |             | 0.97 | (0.36-2.62)   |
| Waist Circumference (cm)                   | 434 | (31)                              | 85.3 (10.6) | (403)                              | 87.6 (11.9) | 1.02 | (0.99-1.05)   |
| Height (cm)                                | 454 | (33)                              | 161.9 (6.8) | (421)                              | 162.9 (6.0) | 1.03 | (0.97-1.09)   |
| Smoking in pregnancy                       | 534 |                                   |             |                                    |             |      |               |
| Smoker                                     |     | 8.1% (8)                          |             | 91.9% (91)                         |             | Ref  |               |
| Non-Smoker                                 |     | 7.6% (33)                         |             | 92.4% (402)                        |             | 1.07 | (0.48-2.4)    |
| Smoking at 5-yr follow-up                  | 541 |                                   |             |                                    |             |      |               |
| Smoker                                     |     | 7.6% (9)                          |             | 92.4% (110)                        |             | Ref  |               |
| Non-Smoker                                 |     | 7.6% (32)                         |             | 92.4% (390)                        |             | 1.0  | (0.46-2.15)   |
| Energy (Kcal)                              | 546 |                                   |             |                                    |             |      |               |
| Quintile 5 (>2570.9 kcal)                  |     | 13% (14)                          |             | 87.0% (94)                         |             | Ref  |               |
| Quintile 1-4                               |     | 6.4% (28)                         |             | 93.6% (410)                        |             | 2.18 | (1.11-4.30)*  |
| Fats (g)                                   | 546 |                                   |             |                                    |             |      |               |
| Quintile 5 (>106 g)                        |     | 11% (12)                          |             | 89.0% (97)                         |             | Ref  |               |
| Quintile 1-4                               |     | 6.9% (30)                         |             | 93.1% (407)                        |             | 1.68 | (0.83-3.40)†  |
| Top food group (servings/day)              | 545 |                                   |             |                                    |             |      |               |
| Quintile 5 (>8.35 servings)                |     | 11% (12)                          |             | 89.0% (97)                         |             | Ref  |               |
| Quintile 1-4                               |     | 6.9% (30)                         |             | 93.1% (406)                        |             | 1.67 | (0.83-3.39)†  |
| Fruits Veg food group (servings/day)       | 546 |                                   |             |                                    |             |      |               |
| Quintile 1 (<4.5 servings)                 |     | 9.1% (10)                         |             | 90.9% (100)                        |             | Ref  |               |
| Quintile 2-5                               |     | 7.3% (32)                         |             | 92.7% (404)                        |             | 1.26 | (0.60-2.65)   |
| Education level                            | 534 |                                   |             |                                    |             |      |               |
| Lower                                      |     | 10.4% (25)                        |             | 89.6% (215)                        |             | Ref  |               |
| Third Level                                |     | 5.8% (17)                         |             | 94.2% (277)                        |             | 1.90 | (1.00-3.60)*  |
| Employment                                 | 545 |                                   |             |                                    |             |      |               |
| Not Earning                                |     | 6.4% (15)                         |             | 93.6% (221)                        |             | Ref  |               |
| Employed                                   |     | 9% (22)                           |             | 91.0% (222)                        |             | 0.69 | (0.35-1.36)   |
| Self employed                              |     | 7.7% (5)                          |             | 92.3% (60)                         |             | 0.81 | (0.29-2.33)   |
| Self reported health                       | 546 |                                   |             |                                    |             |      |               |
| Relatively Negative                        |     | 17.1% (27)                        |             | 82.9% (131)                        |             | Ref  |               |
| Relatively Positive                        |     | 3.9% (15)                         |             | 96.1% (373)                        |             | 5.10 | (2.64-9.93)** |
| <b>Paternal Characteristics</b>            |     |                                   |             |                                    |             |      |               |
| BMI at 5-yr follow-up (kg/m <sup>2</sup> ) | 66  | (4)                               |             | (62)                               |             | 0.97 | (0.76-1.23)   |
| Waist Circumference (cm)                   | 65  | (3)                               |             | (62)                               |             | 1.01 | (0.90-1.13)   |
| Height (cm)                                | 66  | (4)                               |             | (62)                               |             | 1.01 | (0.88-1.15)   |
| Smoking at 5-yr follow-up                  | 521 |                                   |             |                                    |             |      |               |
| Smoker                                     |     | 11.5% (16)                        |             | 88.5% (123)                        |             | Ref  |               |
| Non-Smoker                                 |     | 5.5% (21)                         |             | 94.5% (361)                        |             | 2.24 | (1.13-4.42)*  |
| Education level                            | 514 |                                   |             |                                    |             |      |               |
| Lower                                      |     | 11.1% (16)                        |             | 88.9% (128)                        |             | Ref  |               |
| Third Level                                |     | 6.2% (23)                         |             | 93.8% (347)                        |             | 1.89 | (0.97-3.68)^  |
| Employment                                 | 518 |                                   |             |                                    |             |      |               |
| Not Earning                                |     | 9.2% (8)                          |             | 90.8% (79)                         |             | Ref  |               |
| Employed                                   |     | 7.9% (24)                         |             | 92.1% (279)                        |             | 1.18 | (0.51-2.72)   |
| Self employed                              |     | 3.9% (5)                          |             | 96.1% (123)                        |             | 2.49 | (0.79-7.89)†  |
| Self reported health                       | 510 |                                   |             |                                    |             |      |               |
| Relatively Negative                        |     | 12.6% (20)                        |             | 87.4% (139)                        |             | Ref  |               |
| Relatively Positive                        |     | 4.6% (16)                         |             | 95.4% (335)                        |             | 3.01 | (1.52-5.99)** |

\*\*p&lt;0.01, \*p&lt;0.05, ^p&lt;0.1, †p&lt;0.2; Ref=reference category (OR=1)

1  
2  
3 **Table 3** presents the multivariable model for association between qualifying lifecourse  
4 variables and children's relatively-positive PRH at age-5. A significantly strong predictor of  
5 children's relatively-positive PRH was child's not being obese by IOTF classification  
6 [OR(95%CI)=5.5(1.4-21.0)]. When BMI was tested as a continuous variable, there was 0.73  
7 (95%CI=0.58-0.93) times lower odds of the child being positively rated on health status for  
8 every 1 kg/m<sup>2</sup> increase in their BMI. Similarly in the waist circumference model, for every 1  
9 cm increase there was 0.89 (95%CI=0.81-0.98) times lower odds of the child getting a  
10 relatively-positive rating on health status. Thus the association between children's BMI or  
11 waist circumference and their PRH only strengthened following adjustments in this  
12 multivariate model, irrespective of being analysed as a categorical or continuous variable.  
13 Another significant predictor of children's relatively-positive PRH was mother's having rated  
14 her own health as relatively-positive. These predictors maintained the highest strength of  
15 association with children's health status when independent variables were standardised (not  
16 reported here). None of the other variables reached the level of statistical significance. The  
17 models explained over 25 percent of variance for children's PRH.  
18  
19  
20  
21  
22  
23  
24  
25  
26  
27  
28  
29  
30  
31  
32  
33  
34  
35  
36  
37  
38  
39  
40  
41  
42  
43  
44  
45  
46  
47  
48  
49  
50  
51  
52  
53  
54  
55  
56  
57  
58  
59  
60



Table 3: Multivariable Logistic Regression model for predictors of children’s relatively-positive parent-rated health, PRH (N=303)

|                                                                        | Relatively Positive PRH      |                 | Relatively Positive PRH     |                 | Relatively Positive PRH    |                 |
|------------------------------------------------------------------------|------------------------------|-----------------|-----------------------------|-----------------|----------------------------|-----------------|
|                                                                        | BMI Categorical <sup>1</sup> |                 | BMI Continuous <sup>2</sup> |                 | WC Continuous <sup>3</sup> |                 |
|                                                                        | OR                           | 95% CI          | OR                          | 95% CI          | OR                         | 95% CI          |
| <b>Child's Individual Characteristics</b>                              |                              |                 |                             |                 |                            |                 |
| BMI [IOTF], Obese <sup>+</sup> vs Overweight / Normal                  | 5.48                         | (1.43-21.03) *  |                             |                 |                            |                 |
| BMI kg/m <sup>2</sup> [Continuous]                                     |                              |                 | 0.73                        | (0.58-0.93) **  |                            |                 |
| Waist Circumference cm [Continuous]                                    |                              |                 |                             |                 | 0.89                       | (0.81-0.98) *   |
| Fats gm [Quintiles], Q5 <sup>+</sup> vs Q1-4                           | 1.57                         | (0.42-5.79)     | 1.49                        | (0.40-5.53)     | 1.32                       | (0.36-4.80)     |
| Top food group servings/d [Quintiles], Q5 <sup>+</sup> vs Q1-4         | 1.23                         | (0.33-4.53)     | 1.30                        | (0.36-4.63)     | 1.29                       | (0.36-4.62)     |
| Fruits Veg food group servings/d [Quintiles], Q1 <sup>+</sup> vs Q2-5  | 2.57                         | (0.75-8.80)     | 2.86                        | (0.83-9.93)     | 2.73                       | (0.78-9.49)     |
| <b>Family Characteristics</b>                                          |                              |                 |                             |                 |                            |                 |
| Household Weekly Income, Less <sup>+</sup> vs High                     | 1.85                         | (0.63-5.40)     | 1.76                        | (0.59-5.21)     | 1.79                       | (0.61-5.26)     |
| Entitlement to General Medical, Card Yes <sup>+</sup> vs No            | 0.94                         | (0.24-3.71)     | 1.03                        | (0.26-4.07)     | 1.04                       | (0.26-4.10)     |
| Fathers' Participation, Not <sup>+</sup> vs Yes                        | 1.88                         | (0.68-5.21)     | 1.86                        | (0.67-5.16)     | 2.06                       | (0.74-5.71)     |
| Support from Spouse/Partner, Less <sup>+</sup> vs More                 | 0.70                         | (0.20-2.49)     | 0.67                        | (0.19-2.33)     | 0.74                       | (0.22-2.52)     |
| Support from Parents, Less <sup>+</sup> vs More                        | 1.92                         | (0.53-6.93)     | 2.33                        | (0.64-8.42)     | 2.37                       | (0.66-8.53)     |
| Support from Children, Less <sup>+</sup> vs More                       | 1.15                         | (0.38-3.45)     | 1.29                        | (0.42-3.91)     | 1.25                       | (0.41-3.82)     |
| Support from Close Relatives, Less <sup>+</sup> vs More                | 0.86                         | (0.23-3.13)     | 0.84                        | (0.24-3.02)     | 0.84                       | (0.23-3.01)     |
| <b>Maternal Characteristics</b>                                        |                              |                 |                             |                 |                            |                 |
| Energy Kcal [Quintiles], Q5 <sup>+</sup> vs Q1-4                       | 1.89                         | (0.30-11.84)    | 2.00                        | (0.31-12.86)    | 1.57                       | (0.28-8.84)     |
| Fats gm [Quintiles], Q5 <sup>+</sup> vs Q1-4                           | 0.72                         | (0.09-5.54)     | 0.59                        | (0.07-4.77)     | 0.92                       | (0.13-6.41)     |
| Top food group servings/d [Quintiles], Q5 <sup>+</sup> vs Q1-4         | 1.08                         | (0.29-3.94)     | 1.30                        | (0.36-4.65)     | 1.18                       | (0.32-4.34)     |
| Education, Lower <sup>+</sup> vs Third level                           | 1.34                         | (0.47-3.78)     | 1.35                        | (0.48-3.80)     | 1.48                       | (0.53-4.13)     |
| Self reported health status, Rel.Negative <sup>+</sup> vs Rel.Positive | 4.20                         | (1.45-12.20) ** | 4.42                        | (1.53-12.79) ** | 4.17                       | (1.47-11.87) ** |
| <b>Paternal Characteristics</b>                                        |                              |                 |                             |                 |                            |                 |
| Current Smoking status, Yes <sup>+</sup> vs No                         | 1.37                         | (0.48-3.93)     | 1.31                        | (0.45-3.83)     | 1.53                       | (0.54-4.35)     |
| Education, Lower <sup>+</sup> vs Third level                           | 0.69                         | (0.21-2.28)     | 0.79                        | (0.24-2.57)     | 0.83                       | (0.26-2.67)     |
| Employment, Non-earning <sup>+</sup> vs Self employed                  | 1.60                         | (0.73-3.53)     | 1.52                        | (0.69-3.32)     | 1.57                       | (0.70-3.53)     |
| Self reported health status, Rel.Negative <sup>+</sup> vs Rel.Positive | 1.48                         | (0.52-4.20)     | 1.54                        | (0.54-4.35)     | 1.43                       | (0.51-3.96)     |

OR=Odds Ratio; <sup>+</sup>Reference category (OR=1); \*\*p<0.01 (2-tailed), \*p<0.05 (2-tailed)

Rel.Negative=Relatively Negative, Rel.Positive=Relatively Positive

<sup>1</sup>Child BMI as a categorical variable; Model Chi-sq = 34.2, df = 21, p = 0.034; -2LL = 128.6, Nagelkerke R-sq = 0.26

<sup>2</sup>Child BMI as a continuous variable; Model Chi-sq = 35.9, df = 21, p = 0.022; -2LL = 126.9, Nagelkerke R-sq = 0.27

<sup>3</sup>Child waist circumference as a continuous variable; Model Chi-sq = 33.8, df = 21, p = 0.038; -2LL = 128.9, Nagelkerke R-sq = 0.25

## Discussion

This analysis showed that determinants from both child's individual and family spheres have an influence on child's health at preschool-age. The factors from all three material, psycho-social and lifestyle domains, the major explanations for child health inequalities,<sup>[8]</sup> were associated at uni-variate levels. However, in the final model this analysis clearly demonstrated a negative association between child's obesity and health status. Child's not being obese was one of the significantly strong predictors of child's relatively-positive health status, which was also observed with measured BMI and waist circumference analysed as continuous variables.

This negative relationship observed between measured obesity and PRH conforms to published literature on primary school age-group children and adolescents.<sup>[45-47]</sup> Most importantly, for the first time to our knowledge, this analysis demonstrates the association having adjusted for food and nutrient intake, along-with a wide range of other explanatory variables.

Self-rated health is an important and valid measure of morbidity, mortality, longevity and health status,<sup>[3,4]</sup> also in Irish adult<sup>[48,49]</sup> and children.<sup>[16]</sup> It is believed to be a more inclusive measure of health than the objective measurements, with a capacity to comprehensively evaluate health dynamics, behaviours and psycho-physiological states that are not otherwise easy to measure.<sup>[3]</sup>

This holistic measure better accommodates the WHO defined concept of health as opposed to a diagnosed specific disease.<sup>[3]</sup> Use of parent proxy for child self-reported health is justified for children too young to have adequate cognitive skills.<sup>[50,51]</sup> Systematic reviews report good agreement between ratings by children and their parents on child HRQoL, particularly for physical health domain.<sup>[50-52]</sup> Parents tend to be thoughtful when responding to proxy questions and report children's usual health disposition.<sup>[53]</sup> Studies on construct validity report positively.<sup>[54-57]</sup> Maternal ratings of child's general health status were found sensitive when validated against children's illnesses and other morbidity or healthcare indicators,<sup>[41,58-60]</sup> including evidence of a gradient in strength of these associations.<sup>[41]</sup> Many national-level studies have accepted parent proxy as an

1  
2  
3 appropriate measure<sup>[17,18,61,62]</sup> and successfully used it to longitudinally demonstrate risk and  
4  
5 consequences of child health.<sup>[17,61]</sup>  
6

7  
8 Self-rated health, a composite measure, represents all domains of HR-QoL,<sup>[4]</sup> but better represents  
9  
10 physical health than HR-QoL.<sup>[63]</sup> Studies on older age-group children have reported stronger/sole  
11  
12 negative associations for general/physical health domain of HR-QoL and obesity,<sup>[46,64]</sup> irrespective  
13  
14 whether children themselves or parents reported their HRQoL,<sup>[29]</sup> and also whether BMI was  
15  
16 analysed as a categorical,<sup>[45,46]</sup> or continuous variable.<sup>[65,66]</sup>  
17

18  
19 Another relevance of this analysis is in demonstrating this association of obesity with general-  
20  
21 health in a nationally representative sample of preschool-age children, for which literature is scant.  
22  
23 Though, a few have shown similar association of obesity with specific paediatric conditions or  
24  
25 admission history in this age-group.<sup>[30,31,67-70]</sup> A longitudinal study speculated that pre-school  
26  
27 obesity influences a decline in early-age health, and then both obesity and poor-health tracks into  
28  
29 adolescence.<sup>[71]</sup> The WHO recommends high priority for determinants of health inequalities during  
30  
31 early development.<sup>[72]</sup>  
32  
33

34  
35 The Lifeways previously demonstrated longitudinal association between parental socio-economic  
36  
37 and lifestyle characteristics and child's BMI and waist circumference.<sup>[36]</sup> In this analysis when  
38  
39 same anthropometric measures are included along-with material, psycho-social, and lifestyle  
40  
41 determinants of child obesity and health, a prominent relationship emerges between children's  
42  
43 anthropometric measures and health status. One possible explanation is that determinants of health  
44  
45 inequalities biologically embed<sup>[21,22]</sup> in early life and child obesity is an early phenotypic  
46  
47 expression of this inequality; though the continued influence of environmental factors is not  
48  
49 undermined. Adult<sup>[25,26]</sup> and adolescence studies<sup>[46,47]</sup> have also shown this association to be  
50  
51 independent of socio-demographic, lifestyle or health-related factors.  
52  
53  
54

55  
56 The observed association between BMI or waist circumference and PRH in the present analysis  
57  
58  
59  
60

1  
2  
3 may be temporal, as demonstrated in adults.<sup>[27,28]</sup> Though a number of large scale cross sectional  
4  
5 studies have shown an association between anthropometric measures of obesity and self rated  
6  
7 health,<sup>[73]</sup> only recently a few nationally representative prospective studies have established the  
8  
9 temporality of this association in adults.<sup>[27,28]</sup> Though this relationship maybe bi-directional to an  
10  
11 extent,<sup>[74,75]</sup> the mounting evidence from longitudinal birth cohort studies regarding a sequential  
12  
13 relationship between lifetime growth trajectories and adult disease, disability and deaths<sup>[2]</sup>  
14  
15 primarily rules out reverse causality in this association and suggests that the association observed  
16  
17 in our birth cohort is also more likely to be temporal. Moreover, the available findings from a few  
18  
19 longitudinal studies on primary school age children suggest that at least in the childhood this  
20  
21 inverse association found between BMI and HRQoL is predominantly in the given direction and  
22  
23 not the reverse.<sup>[76,77]</sup> However, this needs careful interpretation as both anthropometric and health  
24  
25 data were concurrently collected, and this limitation may be addressed with next sweep of cohort  
26  
27 data collection.  
28  
29  
30

31  
32 This analysis demonstrated that maternal health was strongly predictive of her child's health. One  
33  
34 concern is that mother's perception of her own health may bias her perception of her child's  
35  
36 health. However, this intergenerational association has been previously reported,<sup>[41,58,59,78-81]</sup> and  
37  
38 reporting mothers can effectively discriminate between their own and children's  
39  
40 health.<sup>[41,58,59,79,80,82]</sup> Several mechanisms such as inherited susceptibility, uterine environment and  
41  
42 shared environment have been suggested for this familial aggregation pattern.<sup>[58,79,80]</sup>  
43  
44  
45

46  
47 Maternal BMI may be related to both maternal self-rated health and child's BMI, so the observed  
48  
49 associations in this analysis could possibly be a reflection of an association between maternal BMI  
50  
51 and child's PRH. However, this was not observed in our analysis. Maternal BMI at both pre-  
52  
53 pregnancy and 5-year follow-up were not associated with child's PRH at univariate level. Also,  
54  
55 when maternal BMI was forcibly added into the multivariable model (not reported here), the  
56  
57 observed associations did not attenuate.  
58  
59  
60

1  
2  
3 The study has limitations in use of reported rather than measured health status and a relatively  
4 small sample size. Though the study was able to detect the major explanatory domains for child  
5 health inequalities documented in the literature<sup>[8]</sup>, the relatively small sample size of this study  
6 may possibly have underpowered it to detect variables with lesser effect sizes. The complete case  
7 approach to analysis reduced the sample size of the final multivariate model, which may have  
8 power implications. However, this missing data was on account of an accumulation across a  
9 number of variables. On analysis, there was no evidence of selectivity in the participants for whom  
10 there were missing data (**eTable 2**). **eTable 2**, available in the web only supplement, compares  
11 children included and not included in the final model for variables belonging to explanatory  
12 domains. It suggests that there were no significant differences in the characteristics of children  
13 included and not included (due to missing data) for analysis, suggesting that the children in the  
14 final model are representative of the study participants as a whole. It may be argued that the  
15 reduced sample size possibly influenced the odds ratio estimate for the association between  
16 children's relatively-positive PRH and the child's not being obese (using a categorical IOTF  
17 classification). Nonetheless this association between children's anthropometric measures and their  
18 parent-rated health variable is likely to be coherent, because these associations remain statistically  
19 significant even when BMI and WC are analysed as continuous variables.

20  
21  
22  
23  
24  
25  
26  
27  
28  
29  
30  
31  
32  
33  
34  
35  
36  
37  
38  
39  
40  
41 As in most birth cohort studies,<sup>[83,84]</sup> the Lifeways birth cohort also experienced the attrition of  
42 mothers belonging to lower socio-economic status in the early stages of the study. Though this  
43 may underestimate some socioeconomic inequalities<sup>[85]</sup>, it does not negate the exposure-outcome  
44 associations detected through regression models of such longitudinal studies<sup>[86,87]</sup>.

45  
46  
47  
48  
49  
50  
51 Nevertheless, this study has advantages in use of lifecourse variables from pre-conception to age  
52 of 5-years, with measured BMI and waist circumference data. It also has detailed foods and  
53 nutrient data along-with other socio-economic, psycho-social and lifestyle variables for child and  
54 both parents.  
55  
56  
57  
58  
59  
60

1  
2  
3 In conclusion, these analyses from the Lifeways cohort show that lifecourse adversities were  
4 associated with mother-reported health for preschoolers, suggesting an early life influence.  
5  
6 Preschoolers' BMI and waist-circumference demonstrated strong negative associations with  
7 mother-reported health independent of socio-economic, psycho-social, and lifestyle factors,  
8 suggesting early biological expression of lifecourse adversities. The findings have important  
9 implications in understanding how early life environment may create inequalities in developmental  
10 health.  
11  
12  
13  
14  
15  
16  
17  
18  
19  
20  
21  
22  
23  
24  
25  
26  
27  
28  
29  
30  
31  
32  
33  
34  
35  
36  
37  
38  
39  
40  
41  
42  
43  
44  
45  
46  
47  
48  
49  
50  
51  
52  
53  
54  
55  
56  
57  
58  
59  
60

**Footnotes****Acknowledgements**

The Lifeways Cross-Generation Cohort Study is overseen by an interdisciplinary scientific steering group chaired by CCK, the principal investigator. The authors greatly appreciate the participation of the Lifeways cohort families.

**Contributors**

AS undertook all analyses reported in this manuscript, interpreted the findings and drafted the manuscript. CM contributed to data collection at five year follow-up, interpretation of the analysis and critical revision of the manuscript. CCK designed the study, supervised the analyses, interpretation of results and intellectual content of the manuscript. All three authors approved the final version.

**Funding**

The Lifeways Cross-Generation Cohort Study was established as part of European Science Foundation funded 'Social Variations in Health Expectancy in Europe' international research programme and its various sweeps have been funded by the Health Research Board of Ireland. Funding sources had no involvement in design, collection, analysis, interpretation, writing and submission of this manuscript.

**Competing interests**

None of the authors have any conflict of interest, including financial interests relevant to this article to disclose.

**Ethical approvals**

Ethics committees of Coombe University Hospital, Dublin, University College Hospital Galway, University College Dublin, Dublin, and the Irish College of General Practitioners, Ireland.

### **Data sharing statement**

No additional data available. The data manager may be contacted at john.obrien@ucd.ie for more details on the Lifeways Cross-Generation Cohort Study.

### **Appendices**

The supplement includes eTable 1 displaying details of examined variables and eTable 2 which compares children included and not included (due to missing data) in the final model for variables belonging to explanatory domains.



## REFERENCES

1. Barker DJ. Sir Richard Doll Lecture. Developmental origins of chronic disease. *Public Health* 2012;**126**(3):185-9.
2. Power C1, Kuh D, Morton S. From developmental origins of adult disease to life course research on adult disease and aging: insights from birth cohort studies. *Annu Rev Public Health*. 2013;**34**:7-28.
3. Benyamini Y. Self-ratings of health and longevity: a health psychologist's viewpoint on epidemiological findings. *The European Health Psychologist* 2008;**10**:10–13.
4. Bjorner J, Fayers P, Idler E. Self-rated health. In: Fayers PM, Hays RD, eds. *Assessing quality of life in clinical trials: methods and practice*. 2nd edn. New York: Oxford University Press, 2005:309-24.
5. Bronfenbrenner U. Ecological models of human development. In: Postlethwaite TN, Husen T, eds. *International Encyclopedia of Education*. Vol 3. 2nd ed. Oxford, England: Elsevier Sciences, Ltd., 1994: 1643-47.
6. Siddiqi A, Irwin LG, Hertzman C. Total environment assessment model for early child development. Evidence report for the WHO commission on social determinants of health. World Health Organization, 2007.  
[http://www.who.int/social\\_determinants/resources/ecd\\_kn\\_evidence\\_report\\_2007.pdf](http://www.who.int/social_determinants/resources/ecd_kn_evidence_report_2007.pdf)  
(accessed March 30, 2012).

- 1  
2  
3 7. Maggi S, Irwin LJ, Siddiqi A, *et al.* The social determinants of early child development: an  
4  
5 overview. *J Paediatr Child Health* 2010;**46**(11):627-35.  
6  
7
- 8  
9  
10 8. Hertzman C, Li J, Mattes E, *et al.* Social determinants of child health and well-being  
11  
12 [Editorial]. *Health Sociology Review* 2009;**18**(1):3-11.  
13
- 14  
15  
16 9. Ben-Shlomo Y, Kuh D. A life course approach to chronic disease epidemiology:  
17  
18 conceptual models, empirical challenges and interdisciplinary perspectives. *Int J Epidemiol*  
19  
20 2002;**31**(2):285-93.  
21  
22
- 23  
24  
25 10. Halfon N, Hochstein M. Life course health development: an integrated framework for  
26  
27 developing health, policy, and research. *Milbank Q* 2002; **80**(3):433-79, iii.  
28  
29
- 30  
31  
32 11. Graham H, and Power Chris. *Childhood disadvantage and adult health: a lifecourse*  
33  
34 *framework*. London: NHS Health Development Agency, 2004.  
35  
36 [http://www.gserve.nice.org.uk/niceMedia/pdf/childhood\\_disadvantage\\_health.pdf](http://www.gserve.nice.org.uk/niceMedia/pdf/childhood_disadvantage_health.pdf)  
37  
38 (accessed May 24, 2014).  
39  
40
- 41  
42  
43 12. Hertzman C, Power C, Matthews S, *et al.* Using an interactive framework of society and  
44  
45 lifecourse to explain self-rated health in early adulthood. *Soc Sci Med* 2001;**53**(12):1575-  
46  
47 85.  
48  
49
- 50  
51  
52 13. Mensah FK, Hobcraft J. Childhood deprivation, health and development: associations with  
53  
54 adult health in the 1958 and 1970 British prospective birth cohort studies. *J Epidemiol*  
55  
56 *Community Health* 2008;**62**(7):599-606.  
57  
58  
59  
60

- 1  
2  
3  
4  
5 14. Kestila L, Koskinen S, Martelin T, *et al*. Determinants of health in early adulthood: what is  
6 the role of parental education, childhood adversities and own education ? *Eur J Public*  
7  
8 *Health* 2006;**16**(3):305-14.  
9  
10  
11  
12  
13  
14 15. Pollitt R, Rose K, Kaufman J. Evaluating the evidence for models of life course  
15 socioeconomic factors and cardiovascular outcomes: a systematic review. *BMC Public*  
16 *Health* 2005;**5**(1):7.  
17  
18  
19  
20  
21  
22  
23 16. Kelleher CC, Tay J, Gabhainn SN. Influence on self-rated health of socio-demographic,  
24 lifestyle and affluence factors: an analysis of the Irish and international health behaviours  
25 among school-aged children (HBSC) datasets 1998. *Ir Med J* 2007;**100**(8):suppl 43-6.  
26  
27  
28  
29  
30  
31  
32 17. Stein RE, Siegel MJ, Bauman LJ. Double jeopardy: what social risk adds to biomedical  
33 risk in understanding child health and health care utilization. *Acad Pediatr* 2010;**10**(3):165-  
34 71.  
35  
36  
37  
38  
39  
40  
41 18. Stevens GD. Gradients in the health status and developmental risks of young children: the  
42 combined influences of multiple social risk factors. *Matern Child Health J* 2006;**10**(2):187-  
43 99.  
44  
45  
46  
47  
48  
49  
50 19. Krieger N. Theories for social epidemiology in the 21st century: an ecosocial perspective.  
51 *Int J Epidemiol* 2001;**30**(4):668-77.  
52  
53  
54  
55  
56  
57  
58  
59  
60

- 1  
2  
3  
4  
5  
6  
7  
8  
9  
10  
11  
12  
13  
14  
15  
16  
17  
18  
19  
20  
21  
22  
23  
24  
25  
26  
27  
28  
29  
30  
31  
32  
33  
34  
35  
36  
37  
38  
39  
40  
41  
42  
43  
44  
45  
46  
47  
48  
49  
50  
51  
52  
53  
54  
55  
56  
57  
58  
59  
60
20. Krieger N. A glossary for social epidemiology. *J Epidemiol Community Health* 2001;**55**(10):693-700.
21. Hertzman C. The biological embedding of early experience and its effects on health in adulthood. *Ann N Y Acad Sci* 1999;**896**(1):85-95.
22. Hertzman C, Boyce T. How experience gets under the skin to create gradients in developmental health. *Annu Rev Public Health* 2010;**31**:329-47 C1-C3.
23. Butland B, Jebb S, Kopelman P, *et al.* Foresight. Tackling obesities: future choices — Project report. London: Government Office for Science, 2007.  
<http://www.bis.gov.uk/assets/foresight/docs/obesity/17.pdf> (accessed March 30, 2012).
24. Aboderin I, Kalache A, Ben-Shlomo Y, *et al.* Life course perspectives on coronary heart disease, stroke and diabetes: key issues and implications for policy and research. Geneva: World Health Organization, 2002.  
[http://whqlibdoc.who.int/hq/2002/WHO\\_NMH\\_NPH\\_02.1.pdf](http://whqlibdoc.who.int/hq/2002/WHO_NMH_NPH_02.1.pdf) (accessed March 30, 2012).
25. Molarius A, Berglund K, Eriksson C, *et al.* Socioeconomic conditions, lifestyle factors, and self-rated health among men and women in Sweden. *Eur J Public Health* 2007;**17**(2):125-33.
26. Prosper M-H, Moczulski VL, Qureshi A. Obesity as a predictor of self-rated health. *Am J Health Behav* 2009;**33**(3):319-29.

- 1  
2  
3 27. Svedberg P, Bardage C, Sandin S, *et al.* A prospective study of health, life-style and  
4 psychosocial predictors of self-rated health. *Eur J Epidemiol* 2006;**21**(10):767-76.  
5  
6  
7  
8  
9  
10 28. Zajacova A, Burgard SA. Body weight and health from early to mid-adulthood: a  
11 longitudinal analysis. *J Health Soc Behav* 2010;**51**(1):92-107.  
12  
13  
14  
15  
16 29. Tsiros MD, Olds T, Buckley JD, *et al.* Health-related quality of life in obese children and  
17 adolescents. *Int J Obes (Lond)* 2009;**33**(4):387-400.  
18  
19  
20  
21  
22  
23 30. Wake M, Hardy P, Sawyer MG, *et al.* Comorbidities of overweight/obesity in Australian  
24 preschoolers: a cross-sectional population study. *Arch Dis Child* 2008;**93**(6):502-07.  
25  
26  
27  
28  
29  
30 31. Skinner AC, Perrin EM, Steiner MJ. Healthy for now? A cross-sectional study of the  
31 comorbidities in obese preschool children in the United States. *Clin Pediatr (Phila)*  
32 2010;**49**(7):648-55.  
33  
34  
35  
36  
37  
38 32. O'Mahony D, Fallon UB, Hannon F, *et al.* The Lifeways Cross-Generation Study: design,  
39 recruitment and data management considerations. *Ir Med J* 2007;**100**(8):suppl 3-6.  
40  
41  
42  
43  
44  
45 33. Niedhammer I, O'Mahony D, Daly S, *et al.* Occupational predictors of pregnancy outcomes  
46 in Irish working women in the Lifeways cohort. *BJOG* 2009;**116**(7):943-52.  
47  
48  
49  
50  
51  
52 34. Murrin CM, Kelly GE, Tremblay RE, *et al.* Body mass index and height over three  
53 generations: evidence from the Lifeways Cross-Generational Cohort Study. *BMC Public*  
54 *Health* 2012;**12**:81.  
55  
56  
57  
58  
59  
60

- 1  
2  
3  
4  
5 35. National Nutrition Surveillance Centre. Dietary habits of the Irish population: results from  
6  
7 SLÁN, Annual Report 2003. Dublin: National Nutritional Surveillance Centre, Department  
8  
9 of Public Health Medicine and Epidemiology, University College Dublin, Dublin and  
10  
11 Health Promotion Unit, Department of Health and Children, Dublin, 2003.  
12  
13  
14  
15  
16 36. Murrin C. Maternal factors during pregnancy contributing to early life risk of childhood  
17  
18 obesity [PhD Thesis]. Dublin: University College Dublin, 2011.  
19  
20  
21  
22  
23 37. Harrington J. Validation of a food frequency questionnaire as a tool for assessing nutrient  
24  
25 intake [MA Thesis]. Galway: National University of Ireland, 1997.  
26  
27  
28  
29  
30 38. Gregory J, Collins D, Davies P, *et al*. National Diet and Nutrition Survey: children aged  
31  
32 1.5 - 4.5 years. Volume 1: Report of the diet and nutrition survey. London: HMSO, 1995.  
33  
34  
35  
36 39. Food Standards Agency. McCance and Widdowson's The composition of foods, sixth  
37  
38 summary edition. Cambridge: Royal Society of Chemistry, 2002.  
39  
40  
41  
42  
43 40. FFQ\_Software version 1.0. Dublin: National Nutrition Surveillance Centre, School of  
44  
45 Public Health and Population Science, University College Dublin, 2007.  
46  
47  
48  
49 41. Monette S, Séguin L, Gauvin L, *et al*. Validation of a measure of maternal perception of  
50  
51 the child's health status. *Child Care Health Dev* 2007;**33**(4):472-81.  
52  
53  
54  
55  
56  
57  
58  
59  
60

- 1  
2  
3 42. Katz MH. *Multivariable analysis: a practical guide for clinicians and public health*  
4 *researchers*. 3rd ed. New York: Cambridge University Press, 2011.  
5  
6  
7  
8  
9  
10 43. Rogers I and the EURO-BLCS Study Group. The influence of birthweight and intrauterine  
11 environment on adiposity and fat distribution in later life. *Int J Obes Relat Metab Disord*  
12 2003;**27**(7):755-77.  
13  
14  
15  
16  
17  
18 44. Wells JC, Chomtho S, Fewtrell MS. Programming of body composition by early growth  
19 and nutrition. *Proc Nutr Soc* 2007;**66**(3):423-34.  
20  
21  
22  
23  
24  
25 45. Wake M, Salmon L, Waters E, *et al*. Parent-reported health status of overweight and obese  
26 Australian primary school children: a cross-sectional population survey. *Int J Obes Relat*  
27 *Metab Disord* 2002;**26**(5): 717-24.  
28  
29  
30  
31  
32  
33  
34 46. Swallen KC, Reither EN, Haas SA, *et al*. Overweight, obesity, and health-related quality of  
35 life among adolescents: the National Longitudinal Study of Adolescent Health. *Pediatrics*  
36 2005;**115**(2):340-47.  
37  
38  
39  
40  
41  
42  
43 47. Vingilis ER, Wade TJ, Seeley JS. Predictors of adolescent self-rated health. Analysis of the  
44 National Population Health Survey. *Can J Public Health* 2002;**93**(3):193-97.  
45  
46  
47  
48  
49 48. Kelleher CC, Whelan J, Daly L, *et al*. Socio-demographic, environmental, lifestyle and  
50 psychosocial factors predict self rated health in Irish Travellers, a minority nomadic  
51 population. *Health Place* 2012;**18**(2):330-38.  
52  
53  
54  
55  
56  
57  
58  
59  
60

- 1  
2  
3 49. Kelleher CC, Friel S, Nic Gabhainn S, *et al.* Socio-demographic predictors of self-rated  
4 health in the Republic of Ireland: findings from the National Survey on Lifestyle, Attitudes  
5 and Nutrition, SLAN. *Soc Sci Med* 2003;**57**(3):477-86.  
6  
7  
8  
9  
10  
11  
12 50. Eiser C, Morse R. Can parents rate their child's health-related quality of life? Results of a  
13 systematic review. *Qual Life Res* 2001;**10**(4):347-57.  
14  
15  
16  
17  
18 51. Upton P, Lawford J, Eiser C. Parent-child agreement across child health-related quality of  
19 life instruments: a review of the literature. *Qual Life Res* 2008;**17**(6):895-913.  
20  
21  
22  
23  
24  
25 52. Norrby U, Nordholm L, Fasth A. Reliability and validity of the swedish version of child  
26 health questionnaire. *Scand J Rheumatol* 2003;**32**(2):101-7.  
27  
28  
29  
30  
31  
32 53. Davis E, Nicolas C, Waters E, *et al.* Parent-proxy and child self-reported health-related  
33 quality of life: using qualitative methods to explain the discordance. *Qual Life Res*  
34 2007;**16**(5):863-71.  
35  
36  
37  
38  
39  
40 54. Theunissen NC, Vogels TG, Koopman HM, *et al.* The proxy problem: child report versus  
41 parent report in health-related quality of life research. *Qual Life Res* 1998;**7**(5):387-97.  
42  
43  
44  
45  
46  
47 55. Varni JW, Limbers CA, Burwinkle TM. Parent proxy-report of their children's health-  
48 related quality of life: an analysis of 13,878 parents' reliability and validity across age  
49 subgroups using the PedsQL 4.0 Generic Core Scales. *Health Qual Life Outcomes*  
50 2007;**5**:2.  
51  
52  
53  
54  
55  
56  
57  
58  
59  
60



- 1  
2  
3 56. Spencer NJ, Coe C. The development and validation of a measure of parent-reported child  
4 health and morbidity: the Warwick Child Health and Morbidity Profile. *Child Care Health*  
5 *Dev* 1996;**22**(6):367-79.  
6  
7  
8  
9  
10  
11  
12 57. Spencer NJ, Coe C. Validation of the Warwick Child Health and Morbidity Profile in  
13 routine child health surveillance. *Child Care Health Dev* 2000;**26**(4):323-36.  
14  
15  
16  
17  
18 58. McCormick MC, Brooks-Gunn J, Workman-Daniels K, *et al.* Maternal rating of child  
19 health at school age: does the vulnerable child syndrome persist ? *Pediatrics*  
20 1993;**92**(3):380-88.  
21  
22  
23  
24  
25  
26  
27 59. McCormick MC, Brooks-Gunn J, Shorter T, *et al.* Factors associated with maternal rating  
28 of infant health in central Harlem. *J Dev Behav Pediatr* 1989;**10**(3):139-44.  
29  
30  
31  
32  
33  
34 60. McCormick MC, Athreya BH, Bernbaum JC, *et al.* Preliminary observations on maternal  
35 rating of health of children: data from three subspecialty clinics. *J Clin Epidemiol*  
36 1988;**41**(4):323-29.  
37  
38  
39  
40  
41  
42  
43 61. Lynch JL. Infant health, race/ethnicity, and early educational outcomes using the ECLS-B.  
44 *Sociol Inq* 2011;**81**(4):499-526.  
45  
46  
47  
48  
49 62. Gilman SE, McCormick MC. Insights from life course epidemiology. *Acad Pediatr*  
50 2010;**10**(3):159-60.  
51  
52  
53  
54  
55  
56  
57  
58  
59  
60

- 1  
2  
3 63. Smith KW, Avis NE, Assmann SF. Distinguishing between quality of life and health status  
4 in quality of life research: a meta-analysis. *Qual Life Res* 1999;**8**(5):447-59.  
5  
6  
7  
8  
9  
10 64. Pinhas-Hamiel O, Singer S, Pilpel N, *et al.* Health-related quality of life among children  
11 and adolescents: associations with obesity. *Int J Obes (Lond)* 2006;**30**(2):267-72.  
12  
13  
14  
15  
16 65. Williams J, Wake M, Hesketh K, *et al.* Health-related quality of life of overweight and  
17 obese children. *JAMA* 2005;**293**(1):70-6.  
18  
19  
20  
21  
22  
23 66. de Beer M, Hofsteenge GH, Koot HM, *et al.* Health-related-quality-of-life in obese  
24 adolescents is decreased and inversely related to BMI. *Acta Paediatr* 2007;**96**(5):710-14.  
25  
26  
27  
28  
29  
30 67. Shibli R, Rubin L, Akons H, *et al.* Morbidity of overweight ( $\geq 85$ th percentile) in the first 2  
31 years of life. *Pediatrics* 2008;**122**(2):267-72.  
32  
33  
34  
35  
36 68. Suglia SF, Chambers EC, Rosario A, *et al.* Asthma and obesity in three-year-old urban  
37 children: role of sex and home environment. *J Pediatr* 2011;**159**(1):14-20.e11.  
38  
39  
40  
41  
42  
43 69. Tai A, Volkmer R, Burton A. Association between asthma symptoms and obesity in  
44 preschool (4-5 year old) children. *J Asthma* 2009;**46**(4):362-65.  
45  
46  
47  
48  
49  
50 70. Slining M, Adair LS, Goldman BD, *et al.* Infant overweight is associated with delayed  
51 motor development. *J Pediatr* 2010;**157**(1):20-5.e21.  
52  
53  
54  
55  
56  
57  
58  
59  
60

- 1  
2  
3 71. Williams JW, Canterford L, Hesketh KD, *et al.* Changes in body mass index and health  
4 related quality of life from childhood to adolescence. *Int J Pediatr Obes* 2011;**6**(2-2):e442-  
5 e448.  
6  
7  
8  
9  
10  
11 72. Marmot M, Friel S, Bell R, *et al.* Closing the gap in a generation: health equity through  
12 action on the social determinants of health. *Lancet* 2008;**372**(9650):1661-69.  
13  
14  
15  
16  
17 73. Imai K, Gregg EW, Chen YJ, Zhang P, *et al.* The association of BMI with functional status  
18 and self-rated health in US adults. *Obesity (Silver Spring)* 2008;**16**(2):402-8.  
19  
20  
21  
22  
23  
24 74. Simonsen MK, Hundrup YA, Grønbaek M, *et al.* A prospective study of the association  
25 between weight changes and self-rated health. *BMC Womens Health* 2008;**8**:13.  
26  
27  
28  
29  
30  
31 75. Cameron AJ, Magliano DJ, Dunstan DW, *et al.* A bi-directional relationship between  
32 obesity and health-related quality of life: evidence from the longitudinal AusDiab study. *Int*  
33 *J Obes (Lond)* 2012;**36**(2):295-303.  
34  
35  
36  
37  
38  
39 76. Sawyer MG, Harchak T, Wake M, *et al.* Four-year prospective study of BMI and mental  
40 health problems in young children. *Pediatrics* 2011;**128**(4):677-84.  
41  
42  
43  
44  
45  
46  
47 77. Jansen PW, Mensah FK, Clifford S, *et al.* Bidirectional associations between overweight  
48 and health-related quality of life from 4-11 years: Longitudinal Study of Australian  
49 Children. *Int J Obes (Lond)* 2013;**37**(10):1307-13.  
50  
51  
52  
53  
54  
55  
56  
57  
58  
59  
60

- 1  
2  
3 78. Coneus K, Spiess CK. The intergenerational transmission of health in early childhood -  
4 evidence from the German Socio-Economic Panel Study. *Econ Hum Biol* 2012;**10**(1):89-  
5 97.  
6  
7  
8  
9  
10  
11  
12 79. Case A, Lubotsky D, Paxson C. Economic status and health in childhood: the origins of the  
13 gradient. *Am Econ Rev* 2002;**92**(5):1308-34.  
14  
15  
16  
17  
18 80. Silburn SR, Zubrick SR, Garton A, *et al.* Western Australia Child Health Survey: family  
19 and community health. Perth, Western Australia: Australian Bureau of Statistics and the  
20 TVW Telethon Institute for Child Health Research, 1996.  
21  
22  
23  
24  
25  
26  
27 81. Waters E, Doyle J, Wolfe R, *et al.* Influence of parental gender and self-reported health and  
28 illness on parent-reported child health. *Pediatrics* 2000;**106**(6):1422-28.  
29  
30  
31  
32  
33  
34 82. Dadds MR, Stein RE, Silver EJ. The role of maternal psychological adjustment in the  
35 measurement of children's functional status. *J Pediatr Psychol* 1995;**20**(4):527-44.  
36  
37  
38  
39  
40  
41 83. Boyd A, Golding J, Macleod J, *et al.* Cohort Profile: the 'children of the 90s'--the index  
42 offspring of the Avon Longitudinal Study of Parents and Children. *Int J Epidemiol*  
43 2013;**42**(1):111-27.  
44  
45  
46  
47  
48  
49 84. Fraser A, Macdonald-Wallis C, Tilling K, *et al.* Cohort Profile: the Avon Longitudinal  
50 Study of Parents and Children: ALSPAC mothers cohort. *Int J Epidemiol* 2013;**42**(1):97-  
51 110.  
52  
53  
54  
55  
56  
57  
58  
59  
60

- 1  
2  
3 85. Howe L, Galobardes B, Tilling K, *et al.* Does drop-out from cohort studies bias estimates  
4 of socioeconomic inequalities in health? *J Epidemiol Community Health* 2011;**65**:A31.  
5  
6  
7  
8  
9  
10 86. Wolke D, Waylen A, Samara M, *et al.* Selective drop-out in longitudinal studies and non-  
11 biased prediction of behaviour disorders. *Br J Psychiatry* 2009;**195**(3):249-56.  
12  
13  
14  
15  
16 87. Nilsen RM, Vollset SE, Gjessing HK, *et al.* Self-selection and bias in a large prospective  
17 pregnancy cohort in Norway. *Paediatr Perinat Epidemiol* 2009;**23**(6):597-608.  
18  
19  
20  
21  
22  
23  
24  
25  
26  
27  
28  
29  
30  
31  
32  
33  
34  
35  
36  
37  
38  
39  
40  
41  
42  
43  
44  
45  
46  
47  
48  
49  
50  
51  
52  
53  
54  
55  
56  
57  
58  
59  
60

**LICENCE FOR PUBLICATION STATEMENT**

The Corresponding Author has the right to grant on behalf of all authors and does grant on behalf of all authors, an exclusive licence (or non-exclusive for government employees) on a worldwide basis to the BMJ Group and co-owners or contracting owning societies (where published by the BMJ Group on their behalf), and its Licensees to permit this article (if accepted) to be published in any BMJ Group products and to exploit all subsidiary rights, as set out in our licence.

For peer review only

1  
2  
3 1 **Title: Preschoolers' parent rated health disparities are strongly associated with**  
4 2 **measures of adiposity in the Lifeways cohort study children**  
5  
6 3

7 4 **CORRESPONDING AUTHOR:**

8  
9 5 Professor Cecily C Kelleher

10 6 School of Public Health, Physiotherapy and Population Science,

11 7 Woodview House,

12 8 University College Dublin

13 9 Belfield,

14 10 Dublin 4, Republic of Ireland

15 11 Tel: +3531 7162045

16 12 Fax: +3531 7163421

17 13 cecily.kelleher@ucd.ie  
18  
19  
20  
21  
22  
23  
24

25 15 **AUTHORS**

26 16 Aakash Shrivastava<sup>1</sup> PhD

27 17 Celine Murrin<sup>1</sup> PhD

28 18 Cecily C Kelleher<sup>1</sup> MD

29 19 <sup>1</sup>School of Public Health, Physiotherapy and Population Science, University College Dublin,  
30 20 Woodview House, Belfield, Dublin 4, Republic of Ireland  
31  
32  
33  
34

35 22 **Running Title: Childhood obesity a persistent predictor of preschoolers' PRH**  
36  
37  
38

39 24 **KEYWORDS**

40 25 Lifecourse, self-rated health, obesity, BMI, waist circumference, preschool children  
41  
42  
43

44 27 **Word count: 3439**  
45  
46  
47  
48  
49  
50  
51  
52  
53  
54  
55  
56  
57  
58  
59  
60

1  
2  
3 1 **ABSTRACT (Words: 272)**  
4  
5 2

6 3 **Objective**  
7

8  
9 4 To examine the relationship between lifecourse factors from preschoolers' micro-ecosystem  
10  
11 5 and their parent-reported (mother-reported) health (PRH), following them prospectively from  
12  
13 6 preconception to age 5-years. To investigate if preschoolers' BMI and waist-circumference  
14  
15 7 were associated with preschoolers' PRH when controlled for lifecourse predictors.  
16  
17

18 8 **Design**  
19

20  
21 9 Lifeways cross-generation cohort study  
22

23 10 **Setting**  
24

25  
26 11 Ireland  
27  
28

29 12 **Participants**  
30

31  
32 13 Of 1082 families, 62% mothers responded on a health and lifestyle questionnaire at follow-  
33  
34 14 up. Food frequency, BMI and waist-circumference were measured. **There were 547 family**  
35  
36 15 **datasets available for analysis of children's PRH.**  
37  
38

39 16 **Main outcome measure**  
40

41  
42 17 Mother-reported children's PRH at age-5. Associations with child's individual and familial  
43  
44 18 exposures from preconception to age 5-years examined using logistic regression.  
45

46 19 **Results**  
47

48  
49 20 In univariate analysis, relatively-positive rating of children's PRH were associated with  
50  
51 21 children's lower intake of fats [OR(95%CI)=2.2(1.1-4.3)], higher intake of fruits/vegetables  
52  
53 22 [OR(95%CI)=2.2(1.1-4.3)]; as well as familial socio-economic characteristics {higher  
54  
55 23 household income [OR(95%CI)=3.0(1.6-5.9)], non-entitlement to means-tested healthcare  
56  
57  
58  
59  
60



1 [OR(95%CI)=2.1(1.0-4.3)], mothers' higher education [OR(95%CI)=1.9(1.0-3.6)]}, psycho-  
2 social characteristics {father's participation in study [OR(95%CI)=2.1(1.0-4.3)], mothers'  
3 perceiving better support from partner [OR(95%CI)=2.3(1.2-4.3)], children  
4 [OR(95%CI)=1.9(1.0-3.7)] or relatives [OR(95%CI)=2.2(1.1-4.1)]}, parents' lifestyle  
5 {mothers' lower intake of energy [OR(95%CI)=2.2(1.1-4.3)], fathers' non-smoking status  
6 [OR(95%CI)=2.2(1.1-4.4)]}, and parents' health {mothers' self-rated health relatively-  
7 positive [OR(95%CI)=5.1(2.6-9.9)], fathers' self-rated health relatively-positive  
8 [OR(95%CI)=3.0(1.5-6.0)]}.

9 In multivariable analysis ( $\chi^2=34.2, df=21, N=303, R^2=0.26, p<0.05$ ), one of the two strong  
10 predictors of children's relatively-positive PRH was child not being obese by International  
11 Obesity Task Force classification [OR(95%CI)=5.5(1.4-21.0)], observed also using BMI  
12 ( $\text{kg/m}^2$ ) [OR(95%CI)=0.73(0.58-0.93)] or waist-circumference (cm) [OR(95%CI)=0.89(0.81-  
13 0.98)] as continuous variables. The other significant predictor was mothers' self-rated health  
14 relatively-positive [OR(95%CI)=4.2(1.5-12.2)].

## 15 **Conclusions**

16 Preschoolers' health is adversely associated with obesity and this is independent of lifecourse  
17 social and environmental inequalities. **The findings suggest that reducing childhood obesity  
18 and improving maternal health may be useful ways to improve child's global health.**

19

1  
2  
3 **1 Strengths and limitations of this study**  
4

- 5  
6 2 • Nationally representative sample of preschool-age children  
7  
8  
9 3 • Examines the influence of lifecourse adversities, prospectively measured from  
10  
11 4 preconception to age 5 on children's general health at age 5. The study analyses  
12  
13 5 demographic, anthropometric, lifestyle, food and nutrients intake, psycho-social,  
14  
15 6 socio-economic and health-related exposures from both children's individual as well  
16  
17 7 as parental experiences.  
18  
19  
20 8 • Demonstrates a significant and independent association between preschoolers'  
21  
22 9 measured BMI as well as waist circumference and their general health status.  
23  
24  
25 10 • The study is limited by a relatively small sample and use of parent-reported health  
26  
27 11 status.  
28  
29  
30  
31  
32  
33  
34  
35  
36  
37  
38  
39  
40  
41  
42  
43  
44  
45  
46  
47  
48  
49  
50  
51  
52  
53  
54  
55  
56  
57  
58  
59  
60

# 1 MAIN TEXT

## 2 Introduction

3 The development of children is critical to their adult well-being<sup>[1,2]</sup> and across the lifecourse  
4 even subjective estimates may be useful to reflect objectively measured health<sup>[3,4]</sup>.  
5 Bronfenbrenner<sup>[5]</sup> emphasised the importance of children's micro-ecosystem in their  
6 development. Recently, the World Health Organisation's (WHO) Commission on Social  
7 Determinants of Health (CSDH) presented a Total Environment Assessment Model for Early  
8 Child Development (TEAM-ECD),<sup>[6]</sup> which again illustrates the importance of individual and  
9 family spheres of influence on children's health. The relevance of socio-economic, psycho-  
10 social and lifestyle environment in child development and health is widely acknowledged.<sup>[6-8]</sup>  
11 According to the lifecourse hypothesis, risk transmission is characterised by critical periods  
12 and accumulation of risk models.<sup>[9]</sup> Life Course Health Development (LCHD) framework<sup>[10]</sup>  
13 suggests that health is a consequence of multiple determinants that change in context of time  
14 and circumstances as an individual develops; these experiences are programmed into bio-  
15 behavioural regulatory systems during certain critical and sensitive periods of individual's  
16 lifetime to decide their health trajectory. The lifecourse framework on childhood  
17 disadvantage and adult health<sup>[11]</sup> suggests that parental and childhood circumstances from the  
18 point of conception influences individual's health in later life, and the individual's childhood  
19 health and later life circumstances may further add to this foundation. Based on this,  
20 Hertzman and colleagues<sup>[12]</sup> examined self-rated health in adulthood using an integrated  
21 lifecourse framework. There are a few other studies also which have examined lifecourse  
22 determinants of adult global<sup>[13,14]</sup> or specific health status.<sup>[15]</sup> On the contrary, the literature on  
23 the determinants of child global health status is sparse,<sup>[16,17]</sup> particularly for the preschool-age  
24 children.<sup>[18]</sup> Even rarer are studies whose examination includes early lifecourse determinants  
25 of child global health status.

1  
2  
3 1 Thus the first objective of our analysis was to prospectively examine the relationship between  
4  
5 2 demographic, anthropometric, lifestyle, nutritional, psycho-social, socio-economic and  
6  
7 3 health-related lifecourse exposures taken from the children's individual and family spheres of  
8  
9 4 influence starting from preconception up to age 5-years and their global health status at  
10  
11 5 preschool-age.

12  
13  
14 6 In social epidemiology, the construct of "embodiment" refers to biological expression of  
15  
16 7 individuals' materio-social world.<sup>[19,20]</sup> Similarly in lifecourse epidemiology, it is  
17  
18 8 hypothesised that early life experiences get "biologically embedded" during critical or  
19  
20 9 sensitive periods of child development leading to gradients in health.<sup>[21,22]</sup>

21  
22  
23  
24 10 The Foresight report identifies a large array of environmental determinants of obesity, a  
25  
26 11 number of which are again related to early child development.<sup>[23]</sup> This suggests obesity as  
27  
28 12 pivotal risk factor for subsequent health conditions.<sup>[24]</sup>

29  
30  
31 13 The negative relationship between obesity and self-rated health is now increasingly reported  
32  
33 14 in adult populations,<sup>[25,26]</sup> some indicating a temporal relationship<sup>[27,28]</sup> and suggesting that  
34  
35 15 obesity increases health inequalities over time.<sup>[28]</sup> However, evidence on the relationship  
36  
37 16 between obesity and health is relatively limited in child population studies and those  
38  
39 17 available have reported health-related-quality-of-life (HR-QoL)<sup>[29]</sup> instead of a generic  
40  
41 18 measure such as global self-rated health. Moreover, this association is yet to be established  
42  
43 19 for preschool-age children. To our knowledge just two population based studies have  
44  
45 20 examined this association in preschool age-group children<sup>[30,31]</sup> and neither had nutritional  
46  
47 21 information.

48  
49  
50  
51 22 In the Longitudinal Study of Australian Children, Wake *et al.*<sup>[30]</sup> did not find a significant  
52  
53 23 difference in global health status of overweight/obese and normal weight 4-5-year-old  
54  
55 24 children. Skinner *et al.*,<sup>[31]</sup> using data on 3-5-year-olds from the US National Health and  
56  
57  
58  
59  
60

1 Nutrition Examination Survey, reported a poorer global health status in obese and severely  
2 obese preschoolers. Neither of these studies accounted for a number of possibly relevant  
3 confounders, including parental BMI, parental health and nutritional variables.

4 We thus hypothesised that similar to findings from studies on older age-groups,  
5 anthropometric markers of child obesity in our preschool-age children study would also  
6 demonstrate a negative association with their global health status. The next objective of our  
7 analysis was to examine whether anthropometric markers of child obesity would emerge as  
8 strong predictors of global health status when accounted for other socio-economic, psycho-  
9 social, and lifestyle environmental factors in a multivariable model.

## 10 **Methods**

11 The Lifeways cross generation cohort study comprises three generations of 1082 Irish  
12 families and was established in 2001-03; the recruitment procedure of this nationally  
13 representative cohort has been described previously.<sup>[32-34]</sup> The a priori purpose was to  
14 examine familial and cross-generation influences on early childhood development over the  
15 first five years of children's lives. Briefly, would-be mothers were at random recruited from  
16 the two regional maternity hospitals in the Republic of Ireland to get a representative sample.  
17 A comparison between the Lifeways mothers and a nationally representative sample of  
18 women of the same age group from the SLÁN (Survey of Lifestyle, Attitudes and Nutrition)  
19 surveys of Republic of Ireland<sup>[35]</sup> confirmed that the Lifeways mothers were satisfactorily  
20 representative of the Irish general women on socio-demographic characteristics.<sup>[33]</sup>

21 At this early pregnancy stage mothers completed a health and lifestyle status questionnaire  
22 adapted from a validated instrument developed for Irish national SLÁN surveys.<sup>[35]</sup> Mothers  
23 reported their pre-pregnancy height (cm) and weight (kg) and their smoking status during  
24 pregnancy. Mothers' and partners' socio-economic status was recorded. Subsequently at

1 birth, the live infants were added to the cohort along-with maternity and birth related hospital  
2 information.

3 In 2007-08, when these children averaged five years of age, the cohort follow-up recorded a  
4 62% response rate.<sup>[34,36]</sup> Though mothers who responded to the follow-up were more likely to  
5 be of higher socioeconomic status, these mothers did not significantly differ in their baseline  
6 anthropometric characteristics (including BMI) from non-responders.<sup>[34,36]</sup> At this 5-year  
7 follow-up, mothers repeated the health and lifestyle assessment questionnaire, with additional  
8 questions related to her family, including a five-level likert item question “In general, would  
9 you say your / your partner’s / your Lifeways child’s current health is Excellent, Very Good,  
10 Good, Fair or Poor”. Mothers provided information on family’s socio-economic, psycho-  
11 social, and lifestyle status. Mothers reported their habitual dietary intake for the previous year  
12 on a semi-quantitative food frequency (SQFFQ) instrument developed from the EPIC study  
13 (European Prospective Investigation into Cancer and Nutrition) and validated for Irish adult  
14 population.<sup>[37]</sup> Mothers also gave details for the Lifeways child’s habitual diet for the  
15 previous year using a different SQFFQ instrument adapted from the UK National Diet and  
16 Nutrition Survey of 4.5-year-old children.<sup>[38]</sup> The mothers’ and children’s SQFFQ were  
17 validated in the Lifeways study using a 7-day weighed food diary in a sub-sample.<sup>[36]</sup> Food  
18 items were aggregated by defined shelves (food groups) of the Irish food pyramid and  
19 assessment was made for average servings per day of standard food item portions consumed  
20 from the “top” and “fruit and vegetable” food groups (shelves of Irish food pyramid). The  
21 “top” food group comprises of high calorie fat and sugar rich foods. Total energy (kcal) and  
22 total fats (g) intake were computed using conversion values from McCance & Widdowson’s  
23 food composition tables<sup>[39]</sup> with a specially developed FFQ software version 1.0 ©.<sup>[40]</sup>

24 Mothers and children, and if available fathers, were offered at 5-year follow-up an  
25 anthropometric assessment at their home for height (cm), weight (kg) and waist

1  
2  
3 1 circumference (cm) using a standardised protocol,<sup>[34,36]</sup> with 80-85% mothers and children  
4  
5 2 participating. Body mass index (BMI) was calculated from weight and height information  
6  
7 3 (kg/m<sup>2</sup>).  
8  
9

10 4 Thus variables from discrete stages (pre-pregnancy, early pregnancy, at birth, early infancy  
11  
12 5 and 5-year follow-up) of child's early development representing lifecourse exposures from  
13  
14 6 distinct domains (demographic, anthropometric, socio-economic, psycho-social, lifestyle,  
15  
16 7 nutritional and health) of child's individual and family spheres of influence<sup>[6-8]</sup> were  
17  
18 8 considered to analyse determinants of child's health status at age-5. The selection of  
19  
20 9 variables, domains and spheres of influence are based on the CSDH constructed TEAM-  
21  
22 10 ECD, a model of early child development.<sup>[6-8]</sup> These lifecourse variables have been  
23  
24 11 summarised as per time frame in **Table 1**. This lifecourse time frame highlights the stages  
25  
26 12 and transition points relevant from perspective of child's health development.<sup>[10]</sup> Additional  
27  
28 13 details on these variables are provided in **eTable 1** available in the web only supplement. The  
29  
30 14 independent variables have been arranged as child-related, family-related, mother-related,  
31  
32 15 father-related groups for ease of presentation.  
33  
34  
35  
36  
37  
38  
39  
40  
41  
42  
43  
44  
45  
46  
47  
48  
49  
50  
51  
52  
53  
54  
55  
56  
57  
58  
59  
60

1 Table 1: Independent variables examined from lifecourse of 5-yr-old children

| Lifecourse                      | Independent Variables                                                                                                                                                                                                                                                                                                                                                                                                                                                                                                                                                                                                                    |
|---------------------------------|------------------------------------------------------------------------------------------------------------------------------------------------------------------------------------------------------------------------------------------------------------------------------------------------------------------------------------------------------------------------------------------------------------------------------------------------------------------------------------------------------------------------------------------------------------------------------------------------------------------------------------------|
| Pre-pregnancy                   | Maternal Pre-pregnancy BMI                                                                                                                                                                                                                                                                                                                                                                                                                                                                                                                                                                                                               |
| Early pregnancy                 | Family stability<br>Maternal smoking in pregnancy, Maternal Education level<br>Paternal Education level                                                                                                                                                                                                                                                                                                                                                                                                                                                                                                                                  |
| Birth                           | Child's Birth-weight, Gestational age, Gender<br>Maternal Parity                                                                                                                                                                                                                                                                                                                                                                                                                                                                                                                                                                         |
| Infancy                         | Child's breastfeeding status                                                                                                                                                                                                                                                                                                                                                                                                                                                                                                                                                                                                             |
| When children averaged 5-yr age | Child's Age, Height, BMI, Waist circumference, Food intake: top and fruits & vegetables food groups, Nutrient intake: energy and fats intake<br>Family household weekly income, Entitlement to means tested healthcare benefits scheme, Family structure (marital status), Support from partner, parents, children & relatives<br>Maternal Age, Height, BMI, Waist circumference, Smoking, Employment status, Food intake: top and fruits & vegetables food groups, Nutrient intake: energy and fats intake, Self-rated health status<br>Paternal Height, BMI, Waist circumference, Smoking, Employment status, Self-rated health status |

2

3 Children's global health status rated in proxy by their mothers, hereafter referred to as parent-rated health (PRH), was the outcome variable of interest. The 5-graded scale response was

4

5 dichotomised as relatively-positive health (excellent or very good) and relatively-negative

6 health (poor or fair or good), based on similar dichotomisation in other studies on preschool

7 and school children.<sup>[17,18,30]</sup> It is reasonable to take a higher cut-off when dichotomising this

8 age dependent variable in this very young age-group as there would be very limited numbers

9 of poor or fair health children.<sup>[17,18,41]</sup>

10 Initially, uni-variate associations were established between the independent predictors and

11 children's PRH using independent t-tests or chi-square tests. Independent categorical

12 variables were dichotomised in a manner that allowed contrasting extreme levels against the

13 others. Thus, using International Obesity Task Force (IOTF) cut-offs, children's BMI was

14 dichotomised as obese versus over-weight or normal-weight. Similarly nutrition variables

15 ordered in quintiles were dichotomised as the extreme quintile (1<sup>st</sup> or 5<sup>th</sup>) versus the rest.



1  
2  
3 1 From these independent variables principally chosen on the basis of their relevance to the  
4  
5 2 child's development,<sup>[6-8]</sup> all those that qualified at significance level 20% ( $p < 0.2$ )<sup>[42]</sup> in  
6  
7 3 univariate analyses were force entered into a multivariable logistic regression model. BMI  
8  
9 4 ( $\text{kg}/\text{m}^2$ ) and waist circumference (cm), the anthropometric markers of obesity, were tested  
10  
11 5 separately in independent multivariable models. **They were not analysed together within a**  
12  
13 6 **model as results of possible interactions among body composition variables would have been**  
14  
15 7 **difficult to interpret** <sup>[43,44]</sup>. Initially BMI was tested as a categorical variable in a model,  
16  
17 8 followed by two additional models substituting it with BMI and then waist circumference as  
18  
19 9 continuous variables. Other independent variables were tested as categorical variables.

20  
21  
22  
23  
24 10 Ethical approval for the Lifeways study was obtained respectively from ethical committees of  
25  
26 11 participating hospitals and the University College Dublin, Ireland. Written informed consent  
27  
28 12 was obtained from study participants.

### 30 13 **Results**

31  
32  
33 14 There were 547 family datasets available for analysis of children's PRH. **Table 2** presents the  
34  
35 15 uni-variate associations between children's lifecourse variables and PRH. Within the  
36  
37 16 individual-sphere of influences, children's lifestyle behaviours (lower intake of fatty/sugary  
38  
39 17 foods and total fats, and higher intake of fruits/vegetables) and their anthropometric measures  
40  
41 18 at age-5 (not being obese, lower BMI, and lower waist circumference) qualified as  
42  
43 19 determinants of children's relatively-positive PRH for further examination in the  
44  
45 20 multivariable model.

46  
47  
48  
49 21 In other words, retaining  $p < 0.2$  as the criterion for significance, the children's healthy food  
50  
51 22 and nutrient intake habits – such as **lower** intake of unhealthy fat- and sugar- rich foods  
52  
53 23 (servings/day) [OR(95%CI)=1.7(0.8-3.4)] or total fats (g) in their meals  
54  
55 24 [OR(95%CI)=2.2(1.1-4.3)] and **higher** intake of healthy fruits and vegetables (servings/day)

1 [OR(95%CI)=2.2(1.1-4.3)] were positively associated with their favourable rating for health  
2 by their mothers. Conversely, children's **higher** BMI ( $\text{kg/m}^2$ ) [OR(95%CI)=0.85(0.71-1.03)]  
3 and waist circumference (cm) [OR(95%CI)=0.95(0.88-1.02)] were inversely associated with  
4 a positive parental-rated health status.

5 Within the family-sphere of influences, socio-economic status (higher household income,  
6 non-entitlement to subsidised healthcare, both parents' higher education status, and father's  
7 employment status), psycho-social status (father's study participation, mother's perceived  
8 social support), mother's lifestyle behaviours (lower intake of fatty/sugary foods, total energy  
9 and total fats), father's lifestyle behaviours (non-smoker), and both parents' health status  
10 (relatively-positive self-rated health) qualified as determinants of children's relatively-  
11 positive PRH for further examination in the multivariable model.

12 In other words, by maintaining  $p < 0.2$  as the criterion for significance, several indicators of a  
13 family's better socio-economic status— such as **higher** household income (Euros/week)  
14 [OR(95%CI)=3.0(1.6-5.9)], not requiring subsidised healthcare [OR(95%CI)=2.1(1.0-4.3)],  
15 mother having a third level education [OR(95%CI)=1.9(1.0-3.6)], father having a third level  
16 education [OR(95%CI)=1.9(1.0-3.6)], father being self-employed [OR(95%CI)=2.5(0.8-  
17 7.9)]; family's better psycho-social status— such as father's involvement in family affairs  
18 [OR(95%CI)=2.1(1.0-4.3)], mother's perceiving a positive social support from spouse  
19 [OR(95%CI)=2.3(1.2-4.3)], parents [OR(95%CI)=2.0(1.0-4.1)], children  
20 [OR(95%CI)=1.9(1.0-3.7)], or relatives [OR(95%CI)=2.2(1.1-4.1)]; family's better lifestyle  
21 and food and nutrient intake habits— such as mother's **lower** intake of unhealthy fat- and  
22 sugar- rich foods (servings/day) [OR(95%CI)=1.7(0.8-3.4)], total energy (kcal)  
23 [OR(95%CI)=2.2(1.1-4.3)] and total fats (g) [OR(95%CI)=1.7(0.8-3.4)] in her meals, father's  
24 not being a smoker [OR(95%CI)=2.2(1.1-4.4)]; and family's better health status— such as  
25 mother [OR(95%CI)=5.1(2.6-9.9)] and father [OR(95%CI)=3.0(1.5-6.0)] having a positively

1  
2  
3  
4  
5  
6  
7  
8  
9  
10  
11  
12  
13  
14  
15  
16  
17  
18  
19  
20  
21  
22  
23  
24  
25  
26  
27  
28  
29  
30  
31  
32  
33  
34  
35  
36  
37  
38  
39  
40  
41  
42  
43  
44  
45  
46  
47  
48  
49  
50  
51  
52  
53  
54  
55  
56  
57  
58  
59  
60

1 rated health status were positively associated with children’s favourable rating for health by  
2 their mothers.  
3

For peer review only

1 Table 2: Uni-variate lifecourse associates of children's relatively-positive parent-rated health, PRH (N=547)

|                                               | Relatively Negative PRH |                          | Relatively Positive PRH   |      | OR                        | 95% CI |
|-----------------------------------------------|-------------------------|--------------------------|---------------------------|------|---------------------------|--------|
|                                               | N                       | (n=42)<br>%(n) Mean (SD) | (n=505)<br>%(n) Mean (SD) |      |                           |        |
| <b>Child's Individual Characteristics</b>     |                         |                          |                           |      |                           |        |
| Birth-weight adjusted for gestational age (g) | 487                     | (34) 3564.1 (616)        | (453) 3548.4 (552)        | 1.00 | (0.999-1.001)             |        |
| Child's Age (Yrs)                             | 547                     | (42) 5.42 (0.23)         | (505) 5.46 (0.25)         |      |                           |        |
| Gender                                        | 547                     |                          |                           |      |                           |        |
| Male                                          |                         | 8.0% (22)                | 92.0% (242)               | Ref  |                           |        |
| Female                                        |                         | 7.1% (21)                | 92.9% (262)               | 1.14 | (0.60-2.20)               |        |
| BMI (kg/m <sup>2</sup> )                      | 464                     | (35) 17.09 (2.5)         | (429) 16.59 (1.6)         | 0.85 | (0.71-1.03) <sup>^</sup>  |        |
| BMI [IOTF]                                    | 464                     |                          |                           |      |                           |        |
| Obese                                         |                         | 16.7% (5)                | 83.3% (25)                | Ref  |                           |        |
| Overweight / Normal                           |                         | 6.9% (30)                | 93.1% (404)               | 2.69 | (0.96-7.54) <sup>^</sup>  |        |
| Waist Circumference (cm)                      | 462                     | (35) 57.01 (6.8)         | (427) 55.88 (4.3)         | 0.95 | (0.88-1.02) <sup>†</sup>  |        |
| Height (cm)                                   | 464                     | (35) 111.6 (5.6)         | (429) 112.1 (4.8)         | 1.02 | (0.95-1.10)               |        |
| Breastfeeding                                 | 528                     |                          |                           |      |                           |        |
| Not breastfed                                 |                         | 6.5% (16)                | 93.5% (229)               | Ref  |                           |        |
| Breastfed                                     |                         | 8.8% (25)                | 91.2% (258)               | 0.72 | (0.38-1.38)               |        |
| Energy (Kcal)                                 | 547                     |                          |                           |      |                           |        |
| Quintile 5 (>1794 kcal)                       |                         | 10% (11)                 | 90.0% (99)                | Ref  |                           |        |
| Quintile 1-4                                  |                         | 7.1% (31)                | 92.9% (406)               | 1.46 | (0.71-3.00)               |        |
| Fats (g)                                      | 547                     |                          |                           |      |                           |        |
| Quintile 5 (>62.9 g)                          |                         | 12.8% (14)               | 87.2% (95)                | Ref  |                           |        |
| Quintile 1-4                                  |                         | 6.4% (28)                | 93.6% (410)               | 2.16 | (1.09-4.26) <sup>*</sup>  |        |
| Top food group (servings/day)                 | 547                     |                          |                           |      |                           |        |
| Quintile 5 (>6.47 servings)                   |                         | 10.9% (12)               | 89.1% (98)                | Ref  |                           |        |
| Quintile 1-4                                  |                         | 6.9% (30)                | 93.1% (407)               | 1.66 | (0.82-3.36) <sup>†</sup>  |        |
| Fruits Veg food group (servings/d)            | 547                     |                          |                           |      |                           |        |
| Quintile 1 (<2.1 servings)                    |                         | 12.8% (14)               | 87.2% (95)                | Ref  |                           |        |
| Quintile 2-5                                  |                         | 6.4% (28)                | 93.6% (410)               | 2.16 | (1.09-4.26) <sup>*</sup>  |        |
| <b>Family Characteristics</b>                 |                         |                          |                           |      |                           |        |
| Household Weekly Income                       | 509                     |                          |                           |      |                           |        |
| Less than 760 Euros/wk                        |                         | 13.3% (26)               | 86.7% (170)               | Ref  |                           |        |
| More than 760 Euros/wk                        |                         | 4.8% (15)                | 95.2% (298)               | 3.04 | (1.57-5.90) <sup>**</sup> |        |
| Entitlement to General Medical Card           | 532                     |                          |                           |      |                           |        |
| Entitled                                      |                         | 13% (12)                 | 87.0% (80)                | Ref  |                           |        |
| Not entitled                                  |                         | 6.6% (29)                | 93.4% (411)               | 2.13 | (1.04-4.34) <sup>*</sup>  |        |
| Fathers' Participation                        | 547                     |                          |                           |      |                           |        |
| Not                                           |                         | 9.7% (31)                | 90.3% (290)               | Ref  |                           |        |
| Yes                                           |                         | 4.9% (11)                | 95.1% (215)               | 2.09 | (1.03-4.25) <sup>*</sup>  |        |
| Marital Status                                | 542                     |                          |                           |      |                           |        |
| Others                                        |                         | 11.4% (5)                | 88.6% (39)                | Ref  |                           |        |
| Married/Cohabiting                            |                         | 7.2% (36)                | 92.8% (462)               | 1.65 | (0.61-4.43)               |        |
| Elder children in family (Parity)             | 535                     |                          |                           |      |                           |        |
| Nullipara                                     |                         | 8% (18)                  | 92.0% (207)               | Ref  |                           |        |
| Multipara                                     |                         | 7.7% (24)                | 92.3% (286)               | 1.04 | (0.55-1.96)               |        |
| Support from Spouse/Partner                   | 538                     |                          |                           |      |                           |        |
| Lesser support                                |                         | 12.9% (17)               | 87.1% (115)               | Ref  |                           |        |
| More support                                  |                         | 6.2% (25)                | 93.8% (381)               | 2.25 | (1.18-4.32) <sup>*</sup>  |        |
| Support from Parents                          | 487                     |                          |                           |      |                           |        |
| Lesser support                                |                         | 12.5% (12)               | 87.5% (84)                | Ref  |                           |        |
| More support                                  |                         | 6.6% (26)                | 93.4% (365)               | 2.01 | (0.97-4.14) <sup>^</sup>  |        |
| Support from Children                         | 532                     |                          |                           |      |                           |        |
| Lesser support                                |                         | 10.6% (20)               | 89.4% (169)               | Ref  |                           |        |
| More support                                  |                         | 5.8% (20)                | 94.2% (323)               | 1.91 | (1.00-3.65) <sup>*</sup>  |        |
| Support from Close Relatives                  | 510                     |                          |                           |      |                           |        |
| Lesser support                                |                         | 12.4% (19)               | 87.6% (134)               | Ref  |                           |        |
| More support                                  |                         | 6.2% (22)                | 93.8% (335)               | 2.16 | (1.13-4.12) <sup>*</sup>  |        |

1 Table 2: Uni-variate lifecourse associates of children's relatively-positive parent-rated health, PRH (continued)

|                                            | N   | Relatively Negative PRH<br>(n=42) |             | Relatively Positive PRH<br>(n=505) |             | OR   | 95% CI        |
|--------------------------------------------|-----|-----------------------------------|-------------|------------------------------------|-------------|------|---------------|
|                                            |     | %(n)                              | Mean (SD)   | %(n)                               | Mean (SD)   |      |               |
| <b>Maternal Characteristics</b>            |     |                                   |             |                                    |             |      |               |
| Pre-pregnancy BMI (kg/m <sup>2</sup> )     | 475 | (36)                              | 23.3 (3.3)  | (439)                              | 23.8 (3.9)  | 1.04 | (0.94-1.14)   |
| Pre-pregnancy BMI [WHO cut offs]           |     |                                   |             |                                    |             |      |               |
| Obese                                      |     | 2.6% (1)                          |             | 97.4% (38)                         |             | Ref  |               |
| Overweight / Normal                        |     | 8% (35)                           |             | 92.0% (401)                        |             | 0.30 | (0.04-2.26)   |
| Mother's Age (Yrs)                         | 546 | (42)                              | 36.5 (6.3)  | (504)                              | 37.1 (5.3)  | 1.02 | (0.96-1.08)   |
| BMI at 5-yr follow-up (kg/m <sup>2</sup> ) | 432 |                                   | 25.6 (3.9)  |                                    | 26.3 (5.0)  | 1.03 | (0.95-1.12)   |
| BMI at 5-yr follow-up [WHO cut offs]       | 432 |                                   |             |                                    |             |      |               |
| Obese                                      |     | 7.2% (5)                          |             | 92.8% (64)                         |             | Ref  |               |
| Overweight / Normal                        |     | 7.4% (27)                         |             | 92.6% (336)                        |             | 0.97 | (0.36-2.62)   |
| Waist Circumference (cm)                   | 434 | (31)                              | 85.3 (10.6) | (403)                              | 87.6 (11.9) | 1.02 | (0.99-1.05)   |
| Height (cm)                                | 454 | (33)                              | 161.9 (6.8) | (421)                              | 162.9 (6.0) | 1.03 | (0.97-1.09)   |
| Smoking in pregnancy                       | 534 |                                   |             |                                    |             |      |               |
| Smoker                                     |     | 8.1% (8)                          |             | 91.9% (91)                         |             | Ref  |               |
| Non-Smoker                                 |     | 7.6% (33)                         |             | 92.4% (402)                        |             | 1.07 | (0.48-2.4)    |
| Smoking at 5-yr follow-up                  | 541 |                                   |             |                                    |             |      |               |
| Smoker                                     |     | 7.6% (9)                          |             | 92.4% (110)                        |             | Ref  |               |
| Non-Smoker                                 |     | 7.6% (32)                         |             | 92.4% (390)                        |             | 1.0  | (0.46-2.15)   |
| Energy (Kcal)                              | 546 |                                   |             |                                    |             |      |               |
| Quintile 5 (>2570.9 kcal)                  |     | 13% (14)                          |             | 87.0% (94)                         |             | Ref  |               |
| Quintile 1-4                               |     | 6.4% (28)                         |             | 93.6% (410)                        |             | 2.18 | (1.11-4.30)*  |
| Fats (g)                                   | 546 |                                   |             |                                    |             |      |               |
| Quintile 5 (>106 g)                        |     | 11% (12)                          |             | 89.0% (97)                         |             | Ref  |               |
| Quintile 1-4                               |     | 6.9% (30)                         |             | 93.1% (407)                        |             | 1.68 | (0.83-3.40)†  |
| Top food group (servings/day)              | 545 |                                   |             |                                    |             |      |               |
| Quintile 5 (>8.35 servings)                |     | 11% (12)                          |             | 89.0% (97)                         |             | Ref  |               |
| Quintile 1-4                               |     | 6.9% (30)                         |             | 93.1% (406)                        |             | 1.67 | (0.83-3.39)†  |
| Fruits Veg food group (servings/day)       | 546 |                                   |             |                                    |             |      |               |
| Quintile 1 (<4.5 servings)                 |     | 9.1% (10)                         |             | 90.9% (100)                        |             | Ref  |               |
| Quintile 2-5                               |     | 7.3% (32)                         |             | 92.7% (404)                        |             | 1.26 | (0.60-2.65)   |
| Education level                            | 534 |                                   |             |                                    |             |      |               |
| Lower                                      |     | 10.4% (25)                        |             | 89.6% (215)                        |             | Ref  |               |
| Third Level                                |     | 5.8% (17)                         |             | 94.2% (277)                        |             | 1.90 | (1.00-3.60)*  |
| Employment                                 | 545 |                                   |             |                                    |             |      |               |
| Not Earning                                |     | 6.4% (15)                         |             | 93.6% (221)                        |             | Ref  |               |
| Employed                                   |     | 9% (22)                           |             | 91.0% (222)                        |             | 0.69 | (0.35-1.36)   |
| Self employed                              |     | 7.7% (5)                          |             | 92.3% (60)                         |             | 0.81 | (0.29-2.33)   |
| Self reported health                       | 546 |                                   |             |                                    |             |      |               |
| Relatively Negative                        |     | 17.1% (27)                        |             | 82.9% (131)                        |             | Ref  |               |
| Relatively Positive                        |     | 3.9% (15)                         |             | 96.1% (373)                        |             | 5.10 | (2.64-9.93)** |
| <b>Paternal Characteristics</b>            |     |                                   |             |                                    |             |      |               |
| BMI at 5-yr follow-up (kg/m <sup>2</sup> ) | 66  | (4)                               |             | (62)                               |             | 0.97 | (0.76-1.23)   |
| Waist Circumference (cm)                   | 65  | (3)                               |             | (62)                               |             | 1.01 | (0.90-1.13)   |
| Height (cm)                                | 66  | (4)                               |             | (62)                               |             | 1.01 | (0.88-1.15)   |
| Smoking at 5-yr follow-up                  | 521 |                                   |             |                                    |             |      |               |
| Smoker                                     |     | 11.5% (16)                        |             | 88.5% (123)                        |             | Ref  |               |
| Non-Smoker                                 |     | 5.5% (21)                         |             | 94.5% (361)                        |             | 2.24 | (1.13-4.42)*  |
| Education level                            | 514 |                                   |             |                                    |             |      |               |
| Lower                                      |     | 11.1% (16)                        |             | 88.9% (128)                        |             | Ref  |               |
| Third Level                                |     | 6.2% (23)                         |             | 93.8% (347)                        |             | 1.89 | (0.97-3.68)^  |
| Employment                                 | 518 |                                   |             |                                    |             |      |               |
| Not Earning                                |     | 9.2% (8)                          |             | 90.8% (79)                         |             | Ref  |               |
| Employed                                   |     | 7.9% (24)                         |             | 92.1% (279)                        |             | 1.18 | (0.51-2.72)   |
| Self employed                              |     | 3.9% (5)                          |             | 96.1% (123)                        |             | 2.49 | (0.79-7.89)†  |
| Self reported health                       | 510 |                                   |             |                                    |             |      |               |
| Relatively Negative                        |     | 12.6% (20)                        |             | 87.4% (139)                        |             | Ref  |               |
| Relatively Positive                        |     | 4.6% (16)                         |             | 95.4% (335)                        |             | 3.01 | (1.52-5.99)** |

\*\*p&lt;0.01, \*p&lt;0.05, ^p&lt;0.1, †p&lt;0.2; Ref=reference category (OR=1)

1 **Table 3** presents the multivariable model for association between qualifying lifecourse  
2 variables and children's relatively-positive PRH at age-5. A significantly strong predictor of  
3 children's relatively-positive PRH was child's not being obese by IOTF classification  
4 [OR(95%CI)=5.5(1.4-21.0)]. When BMI was tested as a continuous variable, there was 0.73  
5 (95%CI=0.58-0.93) times **lower** odds of the child being positively rated on health status for  
6 every 1 kg/m<sup>2</sup> increase in their BMI. Similarly in the waist circumference model, for every 1  
7 cm increase there was 0.89 (95%CI=0.81-0.98) times **lower** odds of the child getting a  
8 relatively-positive rating on health status. Thus the association between children's BMI or  
9 waist circumference and their PRH only strengthened following adjustments in this  
10 multivariate model, irrespective of being analysed as a categorical or continuous variable.  
11 Another significant predictor of children's relatively-positive PRH was mother's having rated  
12 her own health as relatively-positive. These predictors maintained the highest strength of  
13 association with children's health status when independent variables were standardised (not  
14 reported here). None of the other variables reached the level of statistical significance. The  
15 models explained over 25 percent of variance for children's PRH.

Table 3: Multivariable Logistic Regression model for predictors of children’s relatively-positive parent-rated health, PRH (N=303)

|                                                                        | Relatively Positive PRH      |                 | Relatively Positive PRH     |                 | Relatively Positive PRH    |                 |
|------------------------------------------------------------------------|------------------------------|-----------------|-----------------------------|-----------------|----------------------------|-----------------|
|                                                                        | BMI Categorical <sup>1</sup> |                 | BMI Continuous <sup>2</sup> |                 | WC Continuous <sup>3</sup> |                 |
|                                                                        | OR                           | 95% CI          | OR                          | 95% CI          | OR                         | 95% CI          |
| <b>Child's Individual Characteristics</b>                              |                              |                 |                             |                 |                            |                 |
| BMI [IOTF], Obese <sup>+</sup> vs Overweight / Normal                  | 5.48                         | (1.43-21.03) *  |                             |                 |                            |                 |
| BMI kg/m <sup>2</sup> [Continuous]                                     |                              |                 | 0.73                        | (0.58-0.93) **  |                            |                 |
| Waist Circumference cm [Continuous]                                    |                              |                 |                             |                 | 0.89                       | (0.81-0.98) *   |
| Fats gm [Quintiles], Q5 <sup>+</sup> vs Q1-4                           | 1.57                         | (0.42-5.79)     | 1.49                        | (0.40-5.53)     | 1.32                       | (0.36-4.80)     |
| Top food group servings/d [Quintiles], Q5 <sup>+</sup> vs Q1-4         | 1.23                         | (0.33-4.53)     | 1.30                        | (0.36-4.63)     | 1.29                       | (0.36-4.62)     |
| Fruits Veg food group servings/d [Quintiles], Q1 <sup>+</sup> vs Q2-5  | 2.57                         | (0.75-8.80)     | 2.86                        | (0.83-9.93)     | 2.73                       | (0.78-9.49)     |
| <b>Family Characteristics</b>                                          |                              |                 |                             |                 |                            |                 |
| Household Weekly Income, Less <sup>+</sup> vs High                     | 1.85                         | (0.63-5.40)     | 1.76                        | (0.59-5.21)     | 1.79                       | (0.61-5.26)     |
| Entitlement to General Medical, Card Yes <sup>+</sup> vs No            | 0.94                         | (0.24-3.71)     | 1.03                        | (0.26-4.07)     | 1.04                       | (0.26-4.10)     |
| Fathers' Participation, Not <sup>+</sup> vs Yes                        | 1.88                         | (0.68-5.21)     | 1.86                        | (0.67-5.16)     | 2.06                       | (0.74-5.71)     |
| Support from Spouse/Partner, Less <sup>+</sup> vs More                 | 0.70                         | (0.20-2.49)     | 0.67                        | (0.19-2.33)     | 0.74                       | (0.22-2.52)     |
| Support from Parents, Less <sup>+</sup> vs More                        | 1.92                         | (0.53-6.93)     | 2.33                        | (0.64-8.42)     | 2.37                       | (0.66-8.53)     |
| Support from Children, Less <sup>+</sup> vs More                       | 1.15                         | (0.38-3.45)     | 1.29                        | (0.42-3.91)     | 1.25                       | (0.41-3.82)     |
| Support from Close Relatives, Less <sup>+</sup> vs More                | 0.86                         | (0.23-3.13)     | 0.84                        | (0.24-3.02)     | 0.84                       | (0.23-3.01)     |
| <b>Maternal Characteristics</b>                                        |                              |                 |                             |                 |                            |                 |
| Energy Kcal [Quintiles], Q5 <sup>+</sup> vs Q1-4                       | 1.89                         | (0.30-11.84)    | 2.00                        | (0.31-12.86)    | 1.57                       | (0.28-8.84)     |
| Fats gm [Quintiles], Q5 <sup>+</sup> vs Q1-4                           | 0.72                         | (0.09-5.54)     | 0.59                        | (0.07-4.77)     | 0.92                       | (0.13-6.41)     |
| Top food group servings/d [Quintiles], Q5 <sup>+</sup> vs Q1-4         | 1.08                         | (0.29-3.94)     | 1.30                        | (0.36-4.65)     | 1.18                       | (0.32-4.34)     |
| Education, Lower <sup>+</sup> vs Third level                           | 1.34                         | (0.47-3.78)     | 1.35                        | (0.48-3.80)     | 1.48                       | (0.53-4.13)     |
| Self reported health status, Rel.Negative <sup>+</sup> vs Rel.Positive | 4.20                         | (1.45-12.20) ** | 4.42                        | (1.53-12.79) ** | 4.17                       | (1.47-11.87) ** |
| <b>Paternal Characteristics</b>                                        |                              |                 |                             |                 |                            |                 |
| Current Smoking status, Yes <sup>+</sup> vs No                         | 1.37                         | (0.48-3.93)     | 1.31                        | (0.45-3.83)     | 1.53                       | (0.54-4.35)     |
| Education, Lower <sup>+</sup> vs Third level                           | 0.69                         | (0.21-2.28)     | 0.79                        | (0.24-2.57)     | 0.83                       | (0.26-2.67)     |
| Employment, Non-earning <sup>+</sup> vs Self employed                  | 1.60                         | (0.73-3.53)     | 1.52                        | (0.69-3.32)     | 1.57                       | (0.70-3.53)     |
| Self reported health status, Rel.Negative <sup>+</sup> vs Rel.Positive | 1.48                         | (0.52-4.20)     | 1.54                        | (0.54-4.35)     | 1.43                       | (0.51-3.96)     |

OR=Odds Ratio; <sup>+</sup>Reference category (OR=1); \*\*p<0.01 (2-tailed), \*p<0.05 (2-tailed)

Rel.Negative=Relatively Negative, Rel.Positive=Relatively Positive

<sup>1</sup>Child BMI as a categorical variable; Model Chi-sq = 34.2, df = 21, p = 0.034; -2LL = 128.6, Nagelkerke R-sq = 0.26

<sup>2</sup>Child BMI as a continuous variable; Model Chi-sq = 35.9, df = 21, p = 0.022; -2LL = 126.9, Nagelkerke R-sq = 0.27

<sup>3</sup>Child waist circumference as a continuous variable; Model Chi-sq = 33.8, df = 21, p = 0.038; -2LL = 128.9, Nagelkerke R-sq = 0.25

## 1 Discussion

2 This analysis showed that determinants from both child's individual and family spheres have an  
3 influence on child's health at preschool-age. The factors from all three material, psycho-social and  
4 lifestyle domains, the major explanations for child health inequalities,<sup>[8]</sup> were associated at uni-  
5 variate levels. However, in the final model this analysis clearly demonstrated a negative  
6 association between child's obesity and health status. Child's not being obese was one of the  
7 significantly strong predictors of child's relatively-positive health status, which was also observed  
8 with measured BMI and waist circumference analysed as continuous variables.

9 This negative relationship observed between measured obesity and PRH conforms to published  
10 literature on primary school age-group children and adolescents.<sup>[45-47]</sup> Most importantly, for the  
11 first time to our knowledge, this analysis demonstrates the association having adjusted for food  
12 and nutrient intake, along-with a wide range of other explanatory variables.

13 Self-rated health is an important and valid measure of morbidity, mortality, longevity and health  
14 status,<sup>[3,4]</sup> also in Irish adult<sup>[48,49]</sup> and children.<sup>[16]</sup> It is believed to be a more inclusive measure of  
15 health than the objective measurements, with a capacity to comprehensively evaluate health  
16 dynamics, behaviours and psycho-physiological states that are not otherwise easy to measure.<sup>[3]</sup>

17 This holistic measure better accommodates the WHO defined concept of health as opposed to a  
18 diagnosed specific disease.<sup>[3]</sup> Use of parent proxy for child self-reported health is justified for  
19 children too young to have adequate cognitive skills.<sup>[50,51]</sup> Systematic reviews report good  
20 agreement between ratings by children and their parents on child HRQoL, particularly for physical  
21 health domain.<sup>[50-52]</sup> Parents tend to be thoughtful when responding to proxy questions and report  
22 children's usual health disposition.<sup>[53]</sup> Studies on construct validity report positively.<sup>[54-57]</sup> Maternal  
23 ratings of child's general health status were found sensitive when validated against children's  
24 illnesses and other morbidity or healthcare indicators,<sup>[41,58-60]</sup> including evidence of a gradient in  
25 strength of these associations.<sup>[41]</sup> Many national-level studies have accepted parent proxy as an



1  
2  
3  
4  
5  
6  
7  
8  
9  
10  
11  
12  
13  
14  
15  
16  
17  
18  
19  
20  
21  
22  
23  
24  
25  
26  
27  
28  
29  
30  
31  
32  
33  
34  
35  
36  
37  
38  
39  
40  
41  
42  
43  
44  
45  
46  
47  
48  
49  
50  
51  
52  
53  
54  
55  
56  
57  
58  
59  
60

1 appropriate measure<sup>[17,18,61,62]</sup> and successfully used it to longitudinally demonstrate risk and  
2 consequences of child health.<sup>[17,61]</sup>

3 Self-rated health, a composite measure, represents all domains of HR-QoL,<sup>[4]</sup> but better represents  
4 physical health than HR-QoL.<sup>[63]</sup> Studies on older age-group children have reported stronger/sole  
5 negative associations for general/physical health domain of HR-QoL and obesity,<sup>[46,64]</sup> irrespective  
6 whether children themselves or parents reported their HRQoL,<sup>[29]</sup> and also whether BMI was  
7 analysed as a categorical,<sup>[45,46]</sup> or continuous variable.<sup>[65,66]</sup>

8 Another relevance of this analysis is in demonstrating this association of obesity with general-  
9 health in a nationally representative sample of preschool-age children, for which literature is scant.

10 Though, a few have shown similar association of obesity with specific paediatric conditions or  
11 admission history in this age-group.<sup>[30,31,67-70]</sup> A longitudinal study speculated that pre-school  
12 obesity influences a decline in early-age health, and then both obesity and poor-health tracks into  
13 adolescence.<sup>[71]</sup> The WHO recommends high priority for determinants of health inequalities during  
14 early development.<sup>[72]</sup>

15 The Lifeways previously demonstrated longitudinal association between parental socio-economic  
16 and lifestyle characteristics and child's BMI and waist circumference.<sup>[36]</sup> In this analysis when  
17 same anthropometric measures are included along-with material, psycho-social, and lifestyle  
18 determinants of child obesity and health, a prominent relationship emerges between children's  
19 anthropometric measures and health status. One possible explanation is that determinants of health  
20 inequalities biologically embed<sup>[21,22]</sup> in early life and child obesity is an early phenotypic  
21 expression of this inequality; though the continued influence of environmental factors is not  
22 undermined. Adult<sup>[25,26]</sup> and adolescence studies<sup>[46,47]</sup> have also shown this association to be  
23 independent of socio-demographic, lifestyle or health-related factors.

24 The observed association between BMI or waist circumference and PRH in the present analysis

1  
2  
3 1 may be temporal, as demonstrated in adults.<sup>[27,28]</sup> Though a number of large scale cross sectional  
4  
5 2 studies have shown an association between anthropometric measures of obesity and self rated  
6  
7 3 health,<sup>[73]</sup> only recently a few nationally representative prospective studies have established the  
8  
9 4 temporality of this association in adults.<sup>[27,28]</sup> Though this relationship maybe bi-directional to an  
10  
11 5 extent,<sup>[74,75]</sup> the mounting evidence from longitudinal birth cohort studies regarding a sequential  
12  
13 6 relationship between lifetime growth trajectories and adult disease, disability and deaths<sup>[2]</sup>  
14  
15 7 primarily rules out reverse causality in this association and suggests that the association observed  
16  
17 8 in our birth cohort is also more likely to be temporal. Moreover, the available findings from a few  
18  
19 9 longitudinal studies on primary school age children suggest that at least in the childhood this  
20  
21 10 inverse association found between BMI and HRQoL is predominantly in the given direction and  
22  
23 11 not the reverse.<sup>[76,77]</sup> However, this needs careful interpretation as both anthropometric and health  
24  
25 12 data were concurrently collected, and this limitation may be addressed with next sweep of cohort  
26  
27 13 data collection.

28  
29  
30  
31  
32 14 This analysis demonstrated that maternal health was strongly predictive of her child's health. One  
33  
34 15 concern is that mother's perception of her own health may bias her perception of her child's  
35  
36 16 health. However, this intergenerational association has been previously reported,<sup>[41,58,59,78-81]</sup> and  
37  
38 17 reporting mothers can effectively discriminate between their own and children's  
39  
40 18 health.<sup>[41,58,59,79,80,82]</sup> Several mechanisms such as inherited susceptibility, uterine environment and  
41  
42 19 shared environment have been suggested for this familial aggregation pattern.<sup>[58,79,80]</sup>

43  
44  
45  
46 20 Maternal BMI may be related to both maternal self-rated health and child's BMI, so the observed  
47  
48 21 associations in this analysis could possibly be a reflection of an association between maternal BMI  
49  
50 22 and child's PRH. However, this was not observed in our analysis. Maternal BMI at both pre-  
51  
52 23 pregnancy and 5-year follow-up were not associated with child's PRH at univariate level. Also,  
53  
54 24 when maternal BMI was forcibly added into the multivariable model (not reported here), the  
55  
56 25 observed associations did not attenuate.

1  
2  
3 1 The study has limitations in use of reported rather than measured health status and a relatively  
4  
5 2 small sample size. Though the study was able to detect the major explanatory domains for child  
6  
7 3 health inequalities documented in the literature<sup>[8]</sup>, the relatively small sample size of this study  
8  
9 4 may possibly have underpowered it to detect variables with lesser effect sizes. The complete case  
10  
11 5 approach to analysis reduced the sample size of the final multivariate model, **which may have**  
12  
13 6 **power implications.** However, this missing data was on account of **an accumulation across a**  
14  
15 7 **number of variables. On analysis, there was no evidence of selectivity in the participants for whom**  
16  
17 8 **there were missing data (eTable 2). eTable 2, available in the web only supplement, compares**  
18  
19 9 **children included and not included in the final model for variables belonging to explanatory**  
20  
21 10 **domains. It suggests that there were no significant differences in the characteristics of children**  
22  
23 11 **included and not included (due to missing data) for analysis, suggesting that the children in the**  
24  
25 12 **final model are representative of the study participants as a whole.** It may be argued that the  
26  
27 13 reduced sample size possibly influenced the odds ratio estimate for the association between  
28  
29 14 children's relatively-positive PRH and the child's not being obese (using a categorical IOTF  
30  
31 15 classification). Nonetheless this association between children's anthropometric measures and their  
32  
33 16 parent-rated health variable is likely to be coherent, because these associations remain statistically  
34  
35 17 significant even when BMI and WC are analysed as continuous variables.

36  
37  
38  
39  
40  
41 18 As in most birth cohort studies,<sup>[83,84]</sup> the Lifeways birth cohort also experienced the attrition of  
42  
43 19 mothers belonging to lower socio-economic status in the early stages of the study. Though this  
44  
45 20 may underestimate some socioeconomic inequalities<sup>[85]</sup>, it does not negate the exposure-outcome  
46  
47 21 associations detected through regression models of such longitudinal studies<sup>[86,87]</sup>.

48  
49  
50  
51 22 Nevertheless, this study has advantages in use of lifecourse variables from pre-conception to age  
52  
53 23 of 5-years, with measured BMI and waist circumference data. It also has detailed foods and  
54  
55 24 nutrient data along-with other socio-economic, psycho-social and lifestyle variables for child and  
56  
57 25 both parents.

1  
2  
3 1 In conclusion, these analyses from the Lifeways cohort show that lifecourse adversities were  
4  
5 2 associated with mother-reported health for preschoolers, suggesting an early life influence.  
6  
7 3 Preschoolers' BMI and waist-circumference demonstrated strong negative associations with  
8  
9 4 mother-reported health independent of socio-economic, psycho-social, and lifestyle factors,  
10  
11 5 suggesting early biological expression of lifecourse adversities. The findings have important  
12  
13 6 implications in understanding how early life environment may create inequalities in developmental  
14  
15 7 health.  
16  
17  
18  
19  
20  
21  
22  
23  
24  
25  
26  
27  
28  
29  
30  
31  
32  
33  
34  
35  
36  
37  
38  
39  
40  
41  
42  
43  
44  
45  
46  
47  
48  
49  
50  
51  
52  
53  
54  
55  
56  
57  
58  
59  
60

1  
2  
3 **1 Footnotes**  
4

5  
6 **2 Acknowledgements**  
7

8 The Lifeways Cross-Generation Cohort Study is overseen by an interdisciplinary scientific  
9 steering group chaired by CCK, the principal investigator. The authors greatly appreciate the  
10 participation of the Lifeways cohort families.  
11  
12

13  
14  
15 **6 Contributors**  
16

17 AS undertook all analyses reported in this manuscript, interpreted the findings and drafted the  
18 manuscript. CM contributed to data collection at five year follow-up, interpretation of the analysis  
19 and critical revision of the manuscript. CCK designed the study, supervised the analyses,  
20 interpretation of results and intellectual content of the manuscript. All three authors approved the  
21 final version.  
22  
23  
24  
25  
26  
27  
28  
29

30 **12 Funding**  
31

32 The Lifeways Cross-Generation Cohort Study was established as part of European Science  
33 Foundation funded 'Social Variations in Health Expectancy in Europe' international research  
34 programme and its various sweeps have been funded by the Health Research Board of Ireland.  
35 Funding sources had no involvement in design, collection, analysis, interpretation, writing and  
36 submission of this manuscript.  
37  
38  
39  
40  
41  
42  
43

44 **18 Competing interests**  
45

46  
47 None  
48

49  
50  
51  
52  
53  
54  
55  
56  
57  
58  
59  
60

1  
2  
3 **1 Ethical approvals**  
4

5  
6 2 Ethics committees of Coombe University Hospital, Dublin, University College Hospital Galway,  
7  
8 3 University College Dublin, Dublin, and the Irish College of General Practitioners, Ireland.  
9

10  
11 **4 Data sharing statement**  
12

13 5 There are no additional data available. The data manager may be contacted at john.obrien@ucd.ie  
14  
15 6 for more details on the Lifeways Cross-Generation Cohort Study.  
16  
17

18  
19 **7 Appendices**  
20

21 8 The supplement includes eTable 1 displaying details of examined variables and eTable 2 which  
22  
23 9 compares children included and not included (due to missing data) in the final model for variables  
24  
25 10 belonging to explanatory domains.  
26  
27

28  
29  
30  
31  
32  
33  
34  
35  
36  
37  
38  
39  
40  
41  
42  
43  
44  
45  
46  
47  
48  
49  
50  
51  
52  
53  
54  
55  
56  
57  
58  
59  
60

1  
2  
3 1 REFERENCES  
4  
5 2  
6  
7 3 1. Barker DJ. Sir Richard Doll Lecture. Developmental origins of chronic disease. *Public*  
8  
9 4 *Health* 2012;**126**(3):185-9.  
10  
11 5  
12  
13 6 2. Power C1, Kuh D, Morton S. From developmental origins of adult disease to life course  
14  
15 7 research on adult disease and aging: insights from birth cohort studies. *Annu Rev Public*  
16  
17 8 *Health*. 2013;**34**:7-28.  
18  
19 9  
20  
21  
22 10 3. Benyamini Y. Self-ratings of health and longevity: a health psychologist's viewpoint on  
23  
24 11 epidemiological findings. *The European Health Psychologist* 2008;**10**:10–13.  
25  
26  
27 12  
28  
29 13 4. Bjorner J, Fayers P, Idler E. Self-rated health. In: Fayers PM, Hays RD, eds. *Assessing*  
30  
31 14 *quality of life in clinical trials: methods and practice*. 2nd edn. New York: Oxford  
32  
33 15 University Press, 2005:309-24.  
34  
35  
36 16  
37  
38 17 5. Bronfenbrenner U. Ecological models of human development. In: Postlethwaite TN, Husen  
39  
40 18 T, eds. *International Encyclopedia of Education*. Vol 3. 2nd ed. Oxford, England: Elsevier  
41  
42 19 Sciences, Ltd., 1994: 1643-47.  
43  
44  
45 20  
46  
47 21 6. Siddiqi A, Irwin LG, Hertzman C. Total environment assessment model for early child  
48  
49 22 development. Evidence report for the WHO commission on social determinants of health.  
50  
51 23 World Health Organization, 2007.  
52  
53 24 [http://www.who.int/social\\_determinants/resources/ecd\\_kn\\_evidence\\_report\\_2007.pdf](http://www.who.int/social_determinants/resources/ecd_kn_evidence_report_2007.pdf)  
54  
55 25 (accessed March 30, 2012).  
56  
57  
58 26  
59  
60

- 1  
2  
3 1 7. Maggi S, Irwin LJ, Siddiqi A, *et al.* The social determinants of early child development: an  
4 overview. *J Paediatr Child Health* 2010;**46**(11):627-35.  
5  
6  
7 3  
8  
9  
10 4 8. Hertzman C, Li J, Mattes E, *et al.* Social determinants of child health and well-being  
11 [Editorial]. *Health Sociology Review* 2009;**18**(1):3-11.  
12  
13  
14 6  
15  
16 7 9. Ben-Shlomo Y, Kuh D. A life course approach to chronic disease epidemiology:  
17 conceptual models, empirical challenges and interdisciplinary perspectives. *Int J Epidemiol*  
18 2002;**31**(2):285-93.  
19  
20  
21 9  
22  
23 10  
24  
25 11 10. Halfon N, Hochstein M. Life course health development: an integrated framework for  
26 developing health, policy, and research. *Milbank Q* 2002; **80**(3):433-79, iii.  
27  
28  
29  
30 13  
31  
32 14 11. Graham H, and Power Chris. *Childhood disadvantage and adult health: a lifecourse*  
33 *framework*. London: NHS Health Development Agency, 2004.  
34  
35  
36 16 [http://www.gserve.nice.org.uk/niceMedia/pdf/childhood\\_disadvantage\\_health.pdf](http://www.gserve.nice.org.uk/niceMedia/pdf/childhood_disadvantage_health.pdf)  
37  
38 17 (accessed May 24, 2014).  
39  
40  
41 18  
42  
43 19 12. Hertzman C, Power C, Matthews S, *et al.* Using an interactive framework of society and  
44 lifecourse to explain self-rated health in early adulthood. *Soc Sci Med* 2001;**53**(12):1575-  
45 20 85.  
46  
47 21  
48  
49  
50 22  
51  
52 23 13. Mensah FK, Hobcraft J. Childhood deprivation, health and development: associations with  
53 adult health in the 1958 and 1970 British prospective birth cohort studies. *J Epidemiol*  
54 24 *Community Health* 2008;**62**(7):599-606.  
55  
56 25  
57  
58  
59  
60



1  
2  
3  
4  
5  
6  
7  
8  
9  
10  
11  
12  
13  
14  
15  
16  
17  
18  
19  
20  
21  
22  
23  
24  
25  
26  
27  
28  
29  
30  
31  
32  
33  
34  
35  
36  
37  
38  
39  
40  
41  
42  
43  
44  
45  
46  
47  
48  
49  
50  
51  
52  
53  
54  
55  
56  
57  
58  
59  
60

- 1
- 2
- 3 1
- 4
- 5 2 14. Kestila L, Koskinen S, Martelin T, *et al.* Determinants of health in early adulthood: what is
- 6
- 7 the role of parental education, childhood adversities and own education ? *Eur J Public*
- 8
- 9 *Health* 2006;**16**(3):305-14.
- 10 4
- 11 5
- 12
- 13
- 14 6 15. Pollitt R, Rose K, Kaufman J. Evaluating the evidence for models of life course
- 15
- 16 socioeconomic factors and cardiovascular outcomes: a systematic review. *BMC Public*
- 17
- 18 *Health* 2005;**5**(1):7.
- 19 8
- 20 9
- 21
- 22
- 23 10 16. Kelleher CC, Tay J, Gabhainn SN. Influence on self-rated health of socio-demographic,
- 24
- 25 lifestyle and affluence factors: an analysis of the Irish and international health behaviours
- 26
- 27 among school-aged children (HBSC) datasets 1998. *Ir Med J* 2007;**100**(8):suppl 43-6.
- 28 12
- 29 13
- 30
- 31
- 32 14 17. Stein RE, Siegel MJ, Bauman LJ. Double jeopardy: what social risk adds to biomedical
- 33
- 34 risk in understanding child health and health care utilization. *Acad Pediatr* 2010;**10**(3):165-
- 35
- 36 16 71.
- 37
- 38 17
- 39
- 40
- 41 18 18. Stevens GD. Gradients in the health status and developmental risks of young children: the
- 42
- 43 combined influences of multiple social risk factors. *Matern Child Health J* 2006;**10**(2):187-
- 44
- 45 20 99.
- 46
- 47 21
- 48
- 49
- 50 22 19. Krieger N. Theories for social epidemiology in the 21st century: an ecosocial perspective.
- 51
- 52 23 *Int J Epidemiol* 2001;**30**(4):668-77.
- 53
- 54 24
- 55
- 56
- 57
- 58
- 59
- 60

- 1  
2  
3 1 20. Krieger N. A glossary for social epidemiology. *J Epidemiol Community Health*  
4  
5 2 2001;**55**(10):693-700.  
6  
7 3  
8  
9  
10 4 21. Hertzman C. The biological embedding of early experience and its effects on health in  
11  
12 5 adulthood. *Ann N Y Acad Sci* 1999;**896**(1):85-95.  
13  
14 6  
15  
16 7 22. Hertzman C, Boyce T. How experience gets under the skin to create gradients in  
17  
18 8 developmental health. *Annu Rev Public Health* 2010;**31**:329-47 C1-C3.  
19  
20 9  
21  
22  
23 10 23. Butland B, Jebb S, Kopelman P, *et al.* Foresight. Tackling obesities: future choices —  
24  
25 11 Project report. London: Government Office for Science, 2007.  
26  
27 12 <http://www.bis.gov.uk/assets/foresight/docs/obesity/17.pdf> (accessed March 30, 2012).  
28  
29 13  
30  
31  
32 14 24. Aboderin I, Kalache A, Ben-Shlomo Y, *et al.* Life course perspectives on coronary heart  
33  
34 15 disease, stroke and diabetes: key issues and implications for policy and research. Geneva:  
35  
36 16 World Health Organization, 2002.  
37  
38 17 [http://whqlibdoc.who.int/hq/2002/WHO\\_NMH\\_NPH\\_02.1.pdf](http://whqlibdoc.who.int/hq/2002/WHO_NMH_NPH_02.1.pdf) (accessed March 30, 2012).  
39  
40 18  
41  
42  
43 19 25. Molarius A, Berglund K, Eriksson C, *et al.* Socioeconomic conditions, lifestyle factors, and  
44  
45 20 self-rated health among men and women in Sweden. *Eur J Public Health* 2007;**17**(2):125-  
46  
47 21 33.  
48  
49 22  
50  
51  
52 23 26. Prosper M-H, Moczulski VL, Qureshi A. Obesity as a predictor of self-rated health. *Am J*  
53  
54 24 *Health Behav* 2009;**33**(3):319-29.  
55  
56 25  
57  
58  
59  
60

- 1  
2  
3 1 27. Svedberg P, Bardage C, Sandin S, *et al.* A prospective study of health, life-style and  
4  
5 2 psychosocial predictors of self-rated health. *Eur J Epidemiol* 2006;**21**(10):767-76.  
6  
7 3  
8  
9 4 28. Zajacova A, Burgard SA. Body weight and health from early to mid-adulthood: a  
10  
11 5 longitudinal analysis. *J Health Soc Behav* 2010;**51**(1):92-107.  
12  
13 6  
14  
15 7 29. Tsiros MD, Olds T, Buckley JD, *et al.* Health-related quality of life in obese children and  
16  
17 8 adolescents. *Int J Obes (Lond)* 2009;**33**(4):387-400.  
18  
19 9  
20  
21 10 30. Wake M, Hardy P, Sawyer MG, *et al.* Comorbidities of overweight/obesity in Australian  
22  
23 11 preschoolers: a cross-sectional population study. *Arch Dis Child* 2008;**93**(6):502-07.  
24  
25 12  
26  
27 13 31. Skinner AC, Perrin EM, Steiner MJ. Healthy for now? A cross-sectional study of the  
28  
29 14 comorbidities in obese preschool children in the United States. *Clin Pediatr (Phila)*  
30  
31 15 2010;**49**(7):648-55.  
32  
33 16  
34  
35 17 32. O'Mahony D, Fallon UB, Hannon F, *et al.* The Lifeways Cross-Generation Study: design,  
36  
37 18 recruitment and data management considerations. *Ir Med J* 2007;**100**(8):suppl 3-6.  
38  
39 19  
40  
41 20 33. Niedhammer I, O'Mahony D, Daly S, *et al.* Occupational predictors of pregnancy outcomes  
42  
43 21 in Irish working women in the Lifeways cohort. *BJOG* 2009;**116**(7):943-52.  
44  
45 22  
46  
47 23 34. Murrin CM, Kelly GE, Tremblay RE, *et al.* Body mass index and height over three  
48  
49 24 generations: evidence from the Lifeways Cross-Generational Cohort Study. *BMC Public*  
50  
51 25 *Health* 2012;**12**:81.  
52  
53  
54  
55  
56  
57  
58  
59  
60

- 1  
2  
3 1  
4  
5 2 35. National Nutrition Surveillance Centre. Dietary habits of the Irish population: results from  
6  
7 3 SLÁN, Annual Report 2003. Dublin: National Nutritional Surveillance Centre, Department  
8  
9 4 of Public Health Medicine and Epidemiology, University College Dublin, Dublin and  
10  
11 5 Health Promotion Unit, Department of Health and Children, Dublin, 2003.  
12  
13 6  
14  
15  
16 7 36. Murrin C. Maternal factors during pregnancy contributing to early life risk of childhood  
17  
18 8 obesity [PhD Thesis]. Dublin: University College Dublin, 2011.  
19  
20 9  
21  
22  
23 10 37. Harrington J. Validation of a food frequency questionnaire as a tool for assessing nutrient  
24  
25 11 intake [MA Thesis]. Galway: National University of Ireland, 1997.  
26  
27 12  
28  
29 13 38. Gregory J, Collins D, Davies P, *et al.* National Diet and Nutrition Survey: children aged  
30  
31 14 1.5 - 4.5 years. Volume 1: Report of the diet and nutrition survey. London: HMSO, 1995.  
32  
33 15  
34  
35  
36 16 39. Food Standards Agency. McCance and Widdowson's The composition of foods, sixth  
37  
38 17 summary edition. Cambridge: Royal Society of Chemistry, 2002.  
39  
40 18  
41  
42  
43 19 40. FFQ\_Software version 1.0. Dublin: National Nutrition Surveillance Centre, School of  
44  
45 20 Public Health and Population Science, University College Dublin, 2007.  
46  
47 21  
48  
49 22 41. Monette S, Séguin L, Gauvin L, *et al.* Validation of a measure of maternal perception of  
50  
51 23 the child's health status. *Child Care Health Dev* 2007;**33**(4):472-81.  
52  
53 24  
54  
55  
56  
57  
58  
59  
60

- 1  
2  
3 1 42. Katz MH. *Multivariable analysis: a practical guide for clinicians and public health*  
4 *researchers*. 3rd ed. New York: Cambridge University Press, 2011.  
5 2  
6  
7 3  
8  
9  
10 4 43. Rogers I and the EURO-BLCS Study Group. The influence of birthweight and intrauterine  
11 *environment on adiposity and fat distribution in later life. Int J Obes Relat Metab Disord*  
12 *2003;27(7):755-77.*  
13 6  
14  
15  
16 7  
17  
18 8 44. Wells JC, Chomtho S, Fewtrell MS. Programming of body composition by early growth  
19 *and nutrition. Proc Nutr Soc 2007;66(3):423-34.*  
20 9  
21  
22  
23 10  
24  
25 11 45. Wake M, Salmon L, Waters E, *et al*. Parent-reported health status of overweight and obese  
26 *Australian primary school children: a cross-sectional population survey. Int J Obes Relat*  
27 *Metab Disord 2002;26(5): 717-24.*  
28 12  
29  
30 13  
31  
32 14  
33  
34 15 46. Swallen KC, Reither EN, Haas SA, *et al*. Overweight, obesity, and health-related quality of  
35 *life among adolescents: the National Longitudinal Study of Adolescent Health. Pediatrics*  
36 *2005;115(2):340-47.*  
37 16  
38  
39 17  
40  
41 18  
42  
43 19 47. Vingilis ER, Wade TJ, Seeley JS. Predictors of adolescent self-rated health. Analysis of the  
44 *National Population Health Survey. Can J Public Health 2002;93(3):193-97.*  
45 20  
46  
47 21  
48  
49 22 48. Kelleher CC, Whelan J, Daly L, *et al*. Socio-demographic, environmental, lifestyle and  
50 *psychosocial factors predict self rated health in Irish Travellers, a minority nomadic*  
51 *population. Health Place 2012;18(2):330-38.*  
52 23  
53  
54 24  
55  
56 25  
57  
58  
59  
60

- 1  
2  
3 1 49. Kelleher CC, Friel S, Nic Gabhainn S, *et al.* Socio-demographic predictors of self-rated  
4 health in the Republic of Ireland: findings from the National Survey on Lifestyle, Attitudes  
5 and Nutrition, SLAN. *Soc Sci Med* 2003;**57**(3):477-86.  
6  
7  
8  
9 4  
10  
11 5 50. Eiser C, Morse R. Can parents rate their child's health-related quality of life? Results of a  
12 systematic review. *Qual Life Res* 2001;**10**(4):347-57.  
13  
14  
15  
16 7  
17  
18 8 51. Upton P, Lawford J, Eiser C. Parent-child agreement across child health-related quality of  
19 life instruments: a review of the literature. *Qual Life Res* 2008;**17**(6):895-913.  
20  
21  
22  
23 10  
24  
25 11 52. Norrby U, Nordholm L, Fasth A. Reliability and validity of the swedish version of child  
26 health questionnaire. *Scand J Rheumatol* 2003;**32**(2):101-7.  
27  
28  
29  
30 13  
31  
32 14 53. Davis E, Nicolas C, Waters E, *et al.* Parent-proxy and child self-reported health-related  
33 quality of life: using qualitative methods to explain the discordance. *Qual Life Res*  
34 2007;**16**(5):863-71.  
35  
36  
37  
38 17  
39  
40 18 54. Theunissen NC, Vogels TG, Koopman HM, *et al.* The proxy problem: child report versus  
41 parent report in health-related quality of life research. *Qual Life Res* 1998;**7**(5):387-97.  
42  
43  
44  
45 20  
46  
47 21 55. Varni JW, Limbers CA, Burwinkle TM. Parent proxy-report of their children's health-  
48 related quality of life: an analysis of 13,878 parents' reliability and validity across age  
49 subgroups using the PedsQL 4.0 Generic Core Scales. *Health Qual Life Outcomes*  
50 2007;**5**:2.  
51  
52  
53  
54 24  
55  
56  
57 25  
58  
59  
60

- 1  
2  
3 1 56. Spencer NJ, Coe C. The development and validation of a measure of parent-reported child  
4 health and morbidity: the Warwick Child Health and Morbidity Profile. *Child Care Health*  
5 2 *Dev* 1996;**22**(6):367-79.  
6  
7 3  
8  
9 4  
10  
11 5 57. Spencer NJ, Coe C. Validation of the Warwick Child Health and Morbidity Profile in  
12 routine child health surveillance. *Child Care Health Dev* 2000;**26**(4):323-36.  
13 6  
14  
15 7  
16  
17 8 58. McCormick MC, Brooks-Gunn J, Workman-Daniels K, *et al.* Maternal rating of child  
18 health at school age: does the vulnerable child syndrome persist ? *Pediatrics*  
19 9 1993;**92**(3):380-88.  
20 10  
21  
22 11  
23  
24 12 59. McCormick MC, Brooks-Gunn J, Shorter T, *et al.* Factors associated with maternal rating  
25 of infant health in central Harlem. *J Dev Behav Pediatr* 1989;**10**(3):139-44.  
26 13  
27 14  
28  
29 15 60. McCormick MC, Athreya BH, Bernbaum JC, *et al.* Preliminary observations on maternal  
30 rating of health of children: data from three subspecialty clinics. *J Clin Epidemiol*  
31 16 1988;**41**(4):323-29.  
32 17  
33 18  
34 19 61. Lynch JL. Infant health, race/ethnicity, and early educational outcomes using the ECLS-B.  
35 *Sociol Inq* 2011;**81**(4):499-526.  
36 20  
37 21  
38  
39 22 62. Gilman SE, McCormick MC. Insights from life course epidemiology. *Acad Pediatr*  
40 23 2010;**10**(3):159-60.  
41 24  
42  
43  
44  
45  
46  
47  
48  
49  
50  
51  
52  
53  
54  
55  
56  
57  
58  
59  
60

- 1  
2  
3 1 63. Smith KW, Avis NE, Assmann SF. Distinguishing between quality of life and health status  
4 in quality of life research: a meta-analysis. *Qual Life Res* 1999;**8**(5):447-59.  
5  
6 2  
7 3  
8  
9  
10 4 64. Pinhas-Hamiel O, Singer S, Pilpel N, *et al.* Health-related quality of life among children  
11 and adolescents: associations with obesity. *Int J Obes (Lond)* 2006;**30**(2):267-72.  
12 5  
13 6  
14  
15  
16 7 65. Williams J, Wake M, Hesketh K, *et al.* Health-related quality of life of overweight and  
17 obese children. *JAMA* 2005;**293**(1):70-6.  
18 8  
19  
20 9  
21  
22  
23 10 66. de Beer M, Hofsteenge GH, Koot HM, *et al.* Health-related-quality-of-life in obese  
24 adolescents is decreased and inversely related to BMI. *Acta Paediatr* 2007;**96**(5):710-14.  
25 11  
26  
27 12  
28  
29 13 67. Shibli R, Rubin L, Akons H, *et al.* Morbidity of overweight ( $\geq 85$ th percentile) in the first 2  
30 years of life. *Pediatrics* 2008;**122**(2):267-72.  
31 14  
32  
33  
34 15  
35  
36 16 68. Suglia SF, Chambers EC, Rosario A, *et al.* Asthma and obesity in three-year-old urban  
37 children: role of sex and home environment. *J Pediatr* 2011;**159**(1):14-20.e11.  
38 17  
39  
40 18  
41  
42 19 69. Tai A, Volkmer R, Burton A. Association between asthma symptoms and obesity in  
43 preschool (4-5 year old) children. *J Asthma* 2009;**46**(4):362-65.  
44 20  
45  
46  
47 21  
48  
49 22 70. Slining M, Adair LS, Goldman BD, *et al.* Infant overweight is associated with delayed  
50 motor development. *J Pediatr* 2010;**157**(1):20-5.e21.  
51 23  
52  
53  
54 24  
55  
56  
57  
58  
59  
60



- 1  
2  
3 1 71. Williams JW, Canterford L, Hesketh KD, *et al.* Changes in body mass index and health  
4 related quality of life from childhood to adolescence. *Int J Pediatr Obes* 2011;**6**(2-2):e442-  
5 e448.  
6  
7 3  
8  
9 4  
10  
11 5 72. Marmot M, Friel S, Bell R, *et al.* Closing the gap in a generation: health equity through  
12 action on the social determinants of health. *Lancet* 2008;**372**(9650):1661-69.  
13  
14 6  
15  
16 7  
17  
18 8 73. Imai K, Gregg EW, Chen YJ, Zhang P, *et al.* The association of BMI with functional status  
19 and self-rated health in US adults. *Obesity (Silver Spring)* 2008;**16**(2):402-8.  
20  
21 9  
22  
23 10  
24  
25 11 74. Simonsen MK, Hundrup YA, Grønbaek M, *et al.* A prospective study of the association  
26 between weight changes and self-rated health. *BMC Womens Health* 2008;**8**:13.  
27  
28 12  
29  
30 13  
31  
32 14 75. Cameron AJ, Magliano DJ, Dunstan DW, *et al.* A bi-directional relationship between  
33 obesity and health-related quality of life: evidence from the longitudinal AusDiab study. *Int*  
34 *J Obes (Lond)* 2012;**36**(2):295-303.  
35  
36 16  
37  
38 17  
39  
40 18 76. Sawyer MG, Harchak T, Wake M, *et al.* Four-year prospective study of BMI and mental  
41 health problems in young children. *Pediatrics* 2011;**128**(4):677-84.  
42  
43 19  
44  
45 20  
46  
47 21 77. Jansen PW, Mensah FK, Clifford S, *et al.* Bidirectional associations between overweight  
48 and health-related quality of life from 4-11 years: Longitudinal Study of Australian  
49 Children. *Int J Obes (Lond)* 2013;**37**(10):1307-13.  
50  
51 23  
52  
53 24  
54  
55  
56  
57  
58  
59  
60

- 1  
2  
3 1 78. Coneus K, Spiess CK. The intergenerational transmission of health in early childhood -  
4  
5 2 evidence from the German Socio-Economic Panel Study. *Econ Hum Biol* 2012;**10**(1):89-  
6  
7 3 97.  
8  
9 4  
10  
11 5 79. Case A, Lubotsky D, Paxson C. Economic status and health in childhood: the origins of the  
12  
13 6 gradient. *Am Econ Rev* 2002;**92**(5):1308-34.  
14  
15 7  
16  
17 8 80. Silburn SR, Zubrick SR, Garton A, *et al.* Western Australia Child Health Survey: family  
18  
19 9 and community health. Perth, Western Australia: Australian Bureau of Statistics and the  
20  
21 10 TVW Telethon Institute for Child Health Research, 1996.  
22  
23 11  
24  
25 12 81. Waters E, Doyle J, Wolfe R, *et al.* Influence of parental gender and self-reported health and  
26  
27 13 illness on parent-reported child health. *Pediatrics* 2000;**106**(6):1422-28.  
28  
29 14  
30  
31 15 82. Dadds MR, Stein RE, Silver EJ. The role of maternal psychological adjustment in the  
32  
33 16 measurement of children's functional status. *J Pediatr Psychol* 1995;**20**(4):527-44.  
34  
35 17  
36  
37 18 83. Boyd A, Golding J, Macleod J, *et al.* Cohort Profile: the 'children of the 90s'--the index  
38  
39 19 offspring of the Avon Longitudinal Study of Parents and Children. *Int J Epidemiol*  
40  
41 20 2013;**42**(1):111-27.  
42  
43 21  
44  
45 22 84. Fraser A, Macdonald-Wallis C, Tilling K, *et al.* Cohort Profile: the Avon Longitudinal  
46  
47 23 Study of Parents and Children: ALSPAC mothers cohort. *Int J Epidemiol* 2013;**42**(1):97-  
48  
49 24 110.  
50  
51 25  
52  
53  
54  
55  
56  
57  
58  
59  
60

- 1  
2  
3 1 85. Howe L, Galobardes B, Tilling K, *et al.* Does drop-out from cohort studies bias estimates  
4 of socioeconomic inequalities in health? *J Epidemiol Community Health* 2011;**65**:A31.  
5 2  
6  
7 3  
8  
9 4 86. Wolke D, Waylen A, Samara M, *et al.* Selective drop-out in longitudinal studies and non-  
10 biased prediction of behaviour disorders. *Br J Psychiatry* 2009;**195**(3):249-56.  
11 5  
12  
13 6  
14  
15 7 87. Nilsen RM, Vollset SE, Gjessing HK, *et al.* Self-selection and bias in a large prospective  
16 pregnancy cohort in Norway. *Paediatr Perinat Epidemiol* 2009;**23**(6):597-608.  
17 8  
18  
19 9  
20  
21  
22  
23  
24  
25  
26  
27  
28  
29  
30  
31  
32  
33  
34  
35  
36  
37  
38  
39  
40  
41  
42  
43  
44  
45  
46  
47  
48  
49  
50  
51  
52  
53  
54  
55  
56  
57  
58  
59  
60

1  
2  
3 **1 LICENCE FOR PUBLICATION STATEMENT**

4 The Corresponding Author has the right to grant on behalf of all authors and does grant on behalf  
5 of all authors, an exclusive licence (or non-exclusive for government employees) on a worldwide  
6 basis to the BMJ Group and co-owners or contracting owning societies (where published by the  
7 BMJ Group on their behalf), and its Licensees to permit this article (if accepted) to be published in  
8 any BMJ Group products and to exploit all subsidiary rights, as set out in our licence.  
9  
10  
11  
12  
13  
14  
15  
16  
17  
18  
19  
20  
21  
22  
23  
24  
25  
26  
27  
28  
29  
30  
31  
32  
33  
34  
35  
36  
37  
38  
39  
40  
41  
42  
43  
44  
45  
46  
47  
48  
49  
50  
51  
52  
53  
54  
55  
56  
57  
58  
59  
60

eTable 1: Lifecourse variables examined for relationship with children's parent-rated health, PRH

| Independent Variables                                                                                      | Time                       | Categories                                                                                                            |
|------------------------------------------------------------------------------------------------------------|----------------------------|-----------------------------------------------------------------------------------------------------------------------|
| <b>Child's Individual characteristics</b>                                                                  |                            |                                                                                                                       |
| <b>Demographic and Anthropometric</b>                                                                      |                            |                                                                                                                       |
| Birth-weight standardised for gestational age (g)                                                          | Measured at birth          | continuous measure                                                                                                    |
| Age at 5-year follow-up (years)                                                                            | At 5-yr follow-up          | continuous measure                                                                                                    |
| Gender                                                                                                     |                            | Male, Female                                                                                                          |
| Body Mass Index (BMI) kg/m <sup>2</sup>                                                                    | Measured at 5-yr follow-up | continuous measure<br>Also as obese versus overweight or normal using IOTF definitions                                |
| Waist Circumference (cm)                                                                                   | Measured at 5-yr follow-up | continuous measure                                                                                                    |
| Height (cm)                                                                                                | Measured at 5-yr follow-up | continuous measure                                                                                                    |
| <b>Lifestyle/Nutrition</b>                                                                                 |                            |                                                                                                                       |
| Breastfeeding                                                                                              | At infancy                 | breastfed or not                                                                                                      |
| Top food group servings per day                                                                            | At 5-yr follow-up          | 5 <sup>th</sup> Quintile (>6.47 servings) versus 1-4 Quintiles.                                                       |
| Fruits & Vegetables food group servings /day                                                               | At 5-yr follow-up          | 1 <sup>st</sup> Quintile (<2.1 servings) versus 2-5 Quintiles                                                         |
| Total Energy intake (kilocalories/day)                                                                     | At 5-yr follow-up          | 5 <sup>th</sup> Quintile (>1794 kcal) versus 1-4 Quintiles                                                            |
| Total Fats intake (grams/day)                                                                              | At 5-yr follow-up          | 5 <sup>th</sup> Quintile (>62.9g) versus 1-4 Quintiles                                                                |
| <b>Family characteristics</b>                                                                              |                            |                                                                                                                       |
| <b>Socio-Economic</b>                                                                                      |                            |                                                                                                                       |
| Household weekly income                                                                                    | At 5-yr follow-up          | composite family income more or less than 760 Euros a week                                                            |
| Entitlement to General Medical Card scheme, a means tested healthcare benefits scheme                      | At 5-yr follow-up          | Families entitled or not to General Medical Card                                                                      |
| <b>Psycho-Social</b>                                                                                       |                            |                                                                                                                       |
| Fathers' participation (Family stability)                                                                  | Early pregnancy stage      | Families whose fathers participated in the study versus families whose fathers did not                                |
| Mother's marital status (Family structure)                                                                 | At 5-yr follow-up          | Married or cohabiting versus single, separated, divorced or widowed.                                                  |
| Elder children in family [Parity was a proxy measure for presence of elder siblings to the Lifeways child] | Early pregnancy stage      | nullipara versus one or more para                                                                                     |
| Support from spouse or partner                                                                             | At 5-yr follow-up          | Mothers perceived "a lot" of support from spouse or partners versus perceived receiving "some, so-so, little" support |
| Support from parents                                                                                       | At 5-yr follow-up          | Mothers perceived "a lot" of support from parents versus perceived receiving "some, so-so, little" support            |

|                                                 |                   |                                                                                                              |
|-------------------------------------------------|-------------------|--------------------------------------------------------------------------------------------------------------|
| Support from children, inclusive Lifeways child | At 5-yr follow-up | Mothers perceived “a lot” of support from children versus perceived receiving “some, so-so, little” support  |
| Support from close relatives                    | At 5-yr follow-up | Mothers perceived “a lot” of support from relatives versus perceived receiving “some, so-so, little” support |

## Maternal characteristics

### **Demographic and Anthropometric**

|                                              |                                                 |                                                                                       |
|----------------------------------------------|-------------------------------------------------|---------------------------------------------------------------------------------------|
| Age at 5-year follow-up (years)              | At 5-yr follow-up                               | continuous measure                                                                    |
| Pre-pregnancy BMI (kg/m <sup>2</sup> )       | Pre-pregnancy, Self-reported in early pregnancy | continuous measure<br>Also as obese versus overweight or normal using WHO definitions |
| BMI at 5-year follow-up (kg/m <sup>2</sup> ) | Measured at 5-yr follow-up                      | continuous measure<br>Also as obese versus overweight or normal using WHO definitions |
| Waist Circumference at 5-year follow-up (cm) | Measured at 5-yr follow-up                      | continuous measure                                                                    |
| Height at 5-year follow-up (cm)              | Measured at 5-yr follow-up                      | continuous measure                                                                    |

### **Lifestyle/Nutrition**

|                                              |                       |                                                                 |
|----------------------------------------------|-----------------------|-----------------------------------------------------------------|
| Smoking during pregnancy                     | Early pregnancy stage | Current smoker or not                                           |
| Smoking at 5-year follow-up                  | At 5-yr follow-up     | Current smoker or not                                           |
| Top food group servings per day              | At 5-yr follow-up     | 5 <sup>th</sup> Quintile (>8.35 servings) versus 1-4 Quintiles. |
| Fruits & Vegetables food group servings /day | At 5-yr follow-up     | 1 <sup>st</sup> Quintile (<4.5 servings) versus 2-5 Quintiles   |
| Total Energy intake (kilocalories/day)       | At 5-yr follow-up     | 5 <sup>th</sup> Quintile (>2570.9 kcal) versus 1-4 Quintiles    |
| Total Fats intake (grams/day)                | At 5-yr follow-up     | 5 <sup>th</sup> Quintile (>106.0 g) versus 1-4 Quintiles        |

### **Socio-Economic**

|                   |                       |                                                     |
|-------------------|-----------------------|-----------------------------------------------------|
| Education level   | Early pregnancy stage | Third level versus lower levels of education status |
| Employment status | At 5-yr follow-up     | Non-earning versus Employed versus Self employed    |

### **Health**

|                                     |                   |                                                                                                                |
|-------------------------------------|-------------------|----------------------------------------------------------------------------------------------------------------|
| Self-rated health status of mothers | At 5-yr follow-up | Relatively Positive (“Excellent” or “Very Good”) versus Relatively Negative (“Poor”/ “Fair” /“Good”) responses |
|-------------------------------------|-------------------|----------------------------------------------------------------------------------------------------------------|

## Paternal Characteristics

### **Anthropometric**

|                                              |                            |                    |
|----------------------------------------------|----------------------------|--------------------|
| BMI at 5-year follow-up (kg/m <sup>2</sup> ) | Measured at 5-yr follow-up | continuous measure |
| Waist Circumference at 5-year follow-up (cm) | Measured at 5-yr follow-up | continuous measure |
| Height at 5-year follow-up (cm)              | Measured at                | continuous measure |

1  
2  
3  
4  
5  
6  
7  
8  
9  
10  
11  
12  
13  
14  
15  
16  
17  
18  
19  
20  
21  
22  
23  
24  
25  
26  
27  
28  
29  
30  
31  
32  
33  
34  
35  
36  
37  
38  
39  
40  
41  
42  
43  
44  
45  
46  
47  
48  
49  
50  
51  
52  
53  
54  
55  
56  
57  
58  
59  
60

|                                                |  |                       |                                                                                                                |
|------------------------------------------------|--|-----------------------|----------------------------------------------------------------------------------------------------------------|
|                                                |  | 5-yr follow-up        |                                                                                                                |
| <b>Lifestyle</b>                               |  |                       |                                                                                                                |
| Smoking at 5-year follow-up                    |  | At 5-yr follow-up     | Current smoker or not                                                                                          |
| <b>Socio-Economic</b>                          |  |                       |                                                                                                                |
| Education level                                |  | Early pregnancy stage | Third level versus lower levels of education status                                                            |
| Employment status                              |  | At 5-yr follow-up     | Non-earning versus Employed versus Self employed                                                               |
| <b>Health</b>                                  |  |                       |                                                                                                                |
| Self-rated health status of fathers (in proxy) |  | At 5-yr follow-up     | Relatively Positive (“Excellent” or “Very Good”) versus Relatively Negative (“Poor”/ “Fair” /“Good”) responses |

For peer review only

eTable 2: Comparative characteristics of children included and not included in the final model (with and without missing data) for selective variables from each of the explanatory domains -

| S.No. | Variables                                         |                                          | Children NOT in the final model – with missing data (n=244) | Children IN the final model – without missing data (n=303) | Statistic - chi-square or t-test | p-value |
|-------|---------------------------------------------------|------------------------------------------|-------------------------------------------------------------|------------------------------------------------------------|----------------------------------|---------|
|       | <b>OUTCOME VARIABLE</b>                           | <b>sub-categories</b>                    | <b>n (%)</b>                                                | <b>n (%)</b>                                               |                                  |         |
| 1     | Parent rated health status of the child           | Good+Fair+Poor<br>Excellent+Very<br>Good | 19 (7.8%)<br><br>225 (92.2%)                                | 23 (7.6%)<br><br>280 (92.4%)                               | 0.01                             | 0.93    |
|       | <b>INDEPENDENT VARIABLES</b>                      |                                          |                                                             |                                                            |                                  |         |
|       | <b>Anthropometric Variables</b>                   |                                          |                                                             |                                                            |                                  |         |
| 2     | Child BMI categorised by IOTF classification      | Obese<br>Overweight plus<br>Normal       | 10 (6.2%)<br><br>151 (93.8%)                                | 20 (6.6%)<br><br>283 (93.4%)                               | 0.03                             | 0.87    |
| 3     | Child BMI (continuous) kg/m <sup>2</sup>          | Mean (Std Dev)                           | 16.73 (1.53)                                                | 16.57 (1.74)                                               | 0.96                             | 0.34    |
| 4     | Child waist circumference (continuous) cm         |                                          | 55.95 (4.49)                                                | 55.97 (4.54)                                               | 0.06                             | 0.95    |
|       | <b>Nutrition Variables</b>                        |                                          |                                                             |                                                            |                                  |         |
| 5     | Top food group consumed by Child (servings/day)   | Quintile 5<br>Quintiles1-4               | 46 (18.9%)<br>198 (81.1%)                                   | 64 (21.1%)<br>239 (78.9%)                                  | 0.43                             | 0.51    |
| 6     | Top food group consumed by Mothers (servings/day) | Quintile 5<br>Quintiles1-4               | 46 (19.0%)<br>196 (81.0%)                                   | 63 (20.8%)<br>240 (79.2%)                                  | 0.27                             | 0.61    |
|       | <b>Behaviour Variables</b>                        |                                          |                                                             |                                                            |                                  |         |
| 7     | Father's smoking                                  | Smoker<br>Non-Smoker                     | 58 (26.6%)<br>160 (73.4%)                                   | 81 (26.7%)<br>222 (73.3%)                                  | 0.01                             | 0.97    |
|       | <b>Health Variables</b>                           |                                          |                                                             |                                                            |                                  |         |
| 8     | Father's health status rating                     | Good+Fair+Poor<br>Excellent+Very<br>Good | 69 (33.3%)<br><br>138 (66.7%)                               | 90 (29.7%)<br><br>213 (70.3%)                              | 0.76                             | 0.39    |
| 9     | Mother's health status rating                     | Good+Fair+Poor<br>Excellent+Very<br>Good | 79 (32.5%)<br><br>164 (67.5%)                               | 79 (26.1%)<br><br>224 (73.9%)                              | 2.72                             | 0.10    |
|       | <b>Socio Economic Variables</b>                   |                                          |                                                             |                                                            |                                  |         |
| 10    | Father's Education                                | Lower<br>Third level                     | 64 (30.3%)<br>147 (69.7%)                                   | 80 (26.4%)<br>223 (73.6%)                                  | 0.95                             | 0.33    |
| 11    | Father's employment status                        | Not Earning<br>Employed<br>Self employed | 44 (20.5%)<br>117 (54.4%)<br>54 (25.1%)                     | 43 (14.2%)<br>186 (61.4%)<br>74 (24.4%)                    | 4.02                             | 0.13    |
|       | <b>Psycho-Social Variables</b>                    |                                          |                                                             |                                                            |                                  |         |
| 12    | Support from Parents                              | Lesser support<br>More support           | 33 (17.9%)<br>151 (82.1%)                                   | 63 (20.8%)<br>240 (79.2%)                                  | 0.59                             | 0.44    |



STROBE Statement: Preschoolers' parent rated health disparities are strongly associated with measures of adiposity in the Lifeways cohort study children

|                           | Item No | Recommendation                                                                                                                                                                                    | Done |
|---------------------------|---------|---------------------------------------------------------------------------------------------------------------------------------------------------------------------------------------------------|------|
| <b>Title and abstract</b> | 1       | (a) Indicate the study's design with a commonly used term in the title or the abstract                                                                                                            | ✓    |
|                           |         | (b) Provide in the abstract an informative and balanced summary of what was done and what was found                                                                                               | ✓    |
| <b>Introduction</b>       |         |                                                                                                                                                                                                   |      |
| Background/rationale      | 2       | Explain the scientific background and rationale for the investigation being reported                                                                                                              | ✓    |
| Objectives                | 3       | State specific objectives, including any prespecified hypotheses                                                                                                                                  | ✓    |
| <b>Methods</b>            |         |                                                                                                                                                                                                   |      |
| Study design              | 4       | Present key elements of study design early in the paper                                                                                                                                           | ✓    |
| Setting                   | 5       | Describe the setting, locations, and relevant dates, including periods of recruitment, exposure, follow-up, and data collection                                                                   | ✓    |
| Participants              | 6       | (a) Give the eligibility criteria, and the sources and methods of selection of participants. Describe methods of follow-up                                                                        | ✓    |
|                           |         | (b) For matched studies, give matching criteria and number of exposed and unexposed                                                                                                               |      |
| Variables                 | 7       | Clearly define all outcomes, exposures, predictors, potential confounders, and effect modifiers. Give diagnostic criteria, if applicable                                                          | ✓    |
| Data sources/measurement  | 8*      | For each variable of interest, give sources of data and details of methods of assessment (measurement). Describe comparability of assessment methods if there is more than one group              | ✓    |
| Bias                      | 9       | Describe any efforts to address potential sources of bias                                                                                                                                         | ✓    |
| Study size                | 10      | Explain how the study size was arrived at                                                                                                                                                         |      |
| Quantitative variables    | 11      | Explain how quantitative variables were handled in the analyses. If applicable, describe which groupings were chosen and why                                                                      | ✓    |
| Statistical methods       | 12      | (a) Describe all statistical methods, including those used to control for confounding                                                                                                             | ✓    |
|                           |         | (b) Describe any methods used to examine subgroups and interactions                                                                                                                               | ✓    |
|                           |         | (c) Explain how missing data were addressed                                                                                                                                                       | ✓    |
|                           |         | (d) If applicable, explain how loss to follow-up was addressed                                                                                                                                    | ✓    |
|                           |         | (e) Describe any sensitivity analyses                                                                                                                                                             | ✓    |
| <b>Results</b>            |         |                                                                                                                                                                                                   |      |
| Participants              | 13*     | (a) Report numbers of individuals at each stage of study—eg numbers potentially eligible, examined for eligibility, confirmed eligible, included in the study, completing follow-up, and analysed | ✓    |
|                           |         | (b) Give reasons for non-participation at each stage                                                                                                                                              | ✓    |
|                           |         | (c) Consider use of a flow diagram                                                                                                                                                                |      |
| Descriptive data          | 14*     | (a) Give characteristics of study participants (eg demographic, clinical, social) and information on exposures and potential confounders                                                          | ✓    |
|                           |         | (b) Indicate number of participants with missing data for each variable of interest                                                                                                               | ✓    |
|                           |         | (c) Summarise follow-up time (eg, average and total amount)                                                                                                                                       | ✓    |
| Outcome data              | 15*     | Report numbers of outcome events or summary measures over time                                                                                                                                    | ✓    |
| Main results              | 16      | (a) Give unadjusted estimates and, if applicable, confounder-adjusted                                                                                                                             | ✓    |

|                          |    |                                                                                                                                                                            |   |
|--------------------------|----|----------------------------------------------------------------------------------------------------------------------------------------------------------------------------|---|
|                          |    | estimates and their precision (eg, 95% confidence interval). Make clear which confounders were adjusted for and why they were included                                     |   |
|                          |    | (b) Report category boundaries when continuous variables were categorized                                                                                                  | ✓ |
|                          |    | (c) If relevant, consider translating estimates of relative risk into absolute risk for a meaningful time period                                                           |   |
| Other analyses           | 17 | Report other analyses done—eg analyses of subgroups and interactions, and sensitivity analyses                                                                             | ✓ |
| <b>Discussion</b>        |    |                                                                                                                                                                            |   |
| Key results              | 18 | Summarise key results with reference to study objectives                                                                                                                   | ✓ |
| Limitations              | 19 | Discuss limitations of the study, taking into account sources of potential bias or imprecision. Discuss both direction and magnitude of any potential bias                 | ✓ |
| Interpretation           | 20 | Give a cautious overall interpretation of results considering objectives, limitations, multiplicity of analyses, results from similar studies, and other relevant evidence | ✓ |
| Generalisability         | 21 | Discuss the generalisability (external validity) of the study results                                                                                                      | ✓ |
| <b>Other information</b> |    |                                                                                                                                                                            |   |
| Funding                  | 22 | Give the source of funding and the role of the funders for the present study and, if applicable, for the original study on which the present article is based              | ✓ |

\*Give information separately for exposed and unexposed groups.

**Note:** An Explanation and Elaboration article discusses each checklist item and gives methodological background and published examples of transparent reporting. The STROBE checklist is best used in conjunction with this article (freely available on the Web sites of PLoS Medicine at <http://www.plosmedicine.org/>, Annals of Internal Medicine at <http://www.annals.org/>, and Epidemiology at <http://www.epidem.com/>). Information on the STROBE Initiative is available at <http://www.strobe-statement.org>.
